# Supplementary material for: Antibiotic Prescription Pattern among Primary Healthcare General Practitioners in the South Batinah Governorate of Oman, 2019
Source: Research Square preprint supplement (doi:10.21203/rs.3.rs-3159843/v1), 2023-07-18
Supplement: Supplementary file 1 [file dc4c81991736d2cd6e970503.xlsx]

## Sheet: Sample
P_AGE 2022	P_SEX	P-Age 2019	Lab Test	PRESENTING_COMPLAINTS	HISTORY_PRESNTLLLNESS	PHYSICAL_EXAMINATION	D_SEX	D_AGE 2019	CREATED_TIME	CREATED_DATE	DEPT_NAME	Antibiotic	1st Diagnosis	2nd Diagnosis	Diagnosis lead to Antibiotics	Appropriateness Y_N	Appropriateness	Work Load 2019	Institute Name
4.9	M	1.9	no	hx of cough +c.cold , fever since 1 day no vomitting , normal bowl habite		? General Examination:- =>Temp :- 37.5?C ; ; General Condition :- Fair ; Pallor :- No ; Cyanosis :- No ; Dehydration :- No ; Throat :- Congested ? Respiratory Examination:- =>transmitted nasal sound ? CVS Examination:- =>s1s2 ? CNS Examination:- =>intact	F	30	2019-01-01 23:14:06	2019-01-01	GENERAL PRACTICE	AMOXYCILLIN	Acute upper respiratory infection, unspecified		Acute pharyngitis, unspecified	Inappropriate	unnecessary	41	Barka PolyClinic
60.8	F	57.8	no	sore throat with flu and fever husky voice..		? General Examination:- =>Temp :- 37?C ; ; General Condition :- Fair ; Jaundice :- No ; Pallor :- No ; Clubbing :- No ; Cyanosis :- No ; Edema Feet :- No ; Dehydration :- No ; Throat :- Congested ? Respiratory Examination:- =>clear ? Abdomen Examination:- =>soft	F	48	2019-01-01 00:19:39	2019-01-01	GENERAL PRACTICE	CEPHALEXIN	Acute pharyngitis, unspecified		Acute pharyngitis, unspecified	Inappropriate	unnecessary	19	Barka PolyClinic
6.8	F	3.8	no	cough fever flu		? General Examination:- =>General Condition :- Fair ; Throat :- Congested temp 36.3 ? Respiratory Examination:- =>Breath Sounds :- Vesicular;Rhonchi :- No;Crepitation :- No; hvb tachycardic ? CVS Examination:- =>First Heart Sound:- Normal ; second Heart Sound:- Normal ; Murmur :- No	F	36	2019-01-02 22:56:04	2019-01-02	GENERAL PRACTICE	AMOXYCILLIN	Acute upper respiratory infection, unspecified		Acute pharyngitis, unspecified	Inappropriate	unnecessary	38	Barka PolyClinic
28.3	F	25.3	no	flu and sore throat since ..one day low back pain two weeks	nursing mother ...delivered 7 months back ....	? General Examination:- =>Temp :- 36.9?C ; ; General Condition :- Looks Well ; Jaundice :- No ; Pallor :- No ; Clubbing :- No ; Cyanosis :- No ; Throat :- Congested ? Respiratory Examination:- =>clear	F	48	2019-01-02 02:21:39	2019-01-02	GENERAL PRACTICE	CEPHALEXIN	Acute nasopharyngitis [common cold]		Acute pharyngitis, unspecified	Inappropriate	unnecessary	15	Barka PolyClinic
5.1	F	2.1	no	fever .. cough and c.cold	fever .. cough and c.cold since two days .. sinec evening two epidoe of vomiting .. no diahrea .. no abdominal pain	? General Examination:- =>Temp :- 37?C ; ; Pallor :- No ; Cyanosis :- No ; Throat :- Congested ? Respiratory Examination:- =>clear	M	46	2019-01-03 00:08:15	2019-01-03	GENERAL PRACTICE	CEPHALEXIN	Acute pharyngitis, unspecified		Acute pharyngitis, unspecified	Inappropriate	unnecessary	18	Barka PolyClinic
14.8	F	11.8	no	11 YR OLD GIRL, NO PMHX PRESENTED WITH H/O FEVER SORE THROAT VOMITTED ONCE POST TOSSIVE NO DIARRHIA		? General Examination:- =>Temp :- 38?C ; ; General Condition :- Looks Well ; Throat :- Tonsillitis ? Respiratory Examination:- =>CLEAR ? Abdomen Examination:- =>SOFT ? CVS Examination:- =>NORMAL S1,S2, NO MURMUR	F	28	2019-01-04 05:47:35	2019-01-04	GENERAL PRACTICE	AMOXYCILLIN	Acute tonsillitis, unspecified		Acute tonsillitis, unspecified	Inappropriate	unnecessary	18	Barka PolyClinic
29.4	M	26.4	no	COUGH WITH SPUTUM. SORE THROAT. MYALGIA+		? General Examination:- =>Temp :- 37.2?C ; ; Throat :- Congested ? Respiratory Examination:- =>NAD	M	49	2019-01-04 01:01:46	2019-01-04	GENERAL PRACTICE	CEPHALEXIN	Cough		Cough	Inappropriate	unnecessary	30	Barka PolyClinic
11.1	M	8.1	no	cold and flu w/ fever for 1 day		? General Examination:- =>Temp :- 37?C ; ; General Condition :- Looks Well ; Jaundice :- No ; Throat :- Congested ? Respiratory Examination:- =>clear	M	33	2019-01-05 02:59:31	2019-01-05	GENERAL PRACTICE	AMOXYCILLIN	Acute upper respiratory infection, unspecified		Acute pharyngitis, unspecified	Inappropriate	unnecessary	37	Barka PolyClinic
5.7	M	2.7	no	cold and flu w/ fever for 2 dat		? General Examination:- =>Temp :- 37.8?C ; ; General Condition :- Fair ; Jaundice :- No ; Pallor :- No ; Dehydration :- No ; Throat :- Congested ? Respiratory Examination:- =>clear	M	33	2019-01-05 01:57:56	2019-01-05	GENERAL PRACTICE	AMOXYCILLIN	Acute nasopharyngitis [common cold]		Acute pharyngitis, unspecified	Inappropriate	unnecessary	37	Barka PolyClinic
12	M	9	no	hx of cough +sputum, c.cold since 2 day no fever croup cough?		? General Examination:- =>Temp :- 36?C ; ; General Condition :- Fair ; Pallor :- No ; Cyanosis :- No ; Dehydration :- No ; Throat :- Congested ? Respiratory Examination:- =>transmitted nasal sound ? CVS Examination:- =>s1s2 ? CNS Examination:- =>intact	F	30	2019-01-05 23:48:42	2019-01-05	GENERAL PRACTICE	AMOXYCILLIN	Acute obstructive laryngitis [croup]		Acute laryngitis	Inappropriate	unnecessary	45	Barka PolyClinic
12.8	M	9.8	no	hx of fever , cough, c.cold ,sor throt since 1 day no vomitting , normal bowl habite		? General Examination:- =>Temp :- 37.7?C ; ; General Condition :- Fair ; Pallor :- No ; Cyanosis :- No ; Dehydration :- No ; Throat :- Tonsillitis temp37.7 ? Respiratory Examination:- =>clear ? CVS Examination:- =>s1s2 ? CNS Examination:- =>intact	F	30	2019-01-05 22:19:28	2019-01-05	GENERAL PRACTICE	AMOXYCILLIN	Acute tonsillitis, unspecified		Acute tonsillitis, unspecified	Inappropriate	unnecessary	45	Barka PolyClinic
13	F	10	no	COUGH . COLD . AND FEVER	COUGH . COLD . AND FEVER SINCE THREE DAYS .. SINCE NIGHT COUGH PERSISTENT ..NO VOMITING . NO RESP .. DISTRESS. PREVOIUS H/O ASTHMA	? General Examination:- =>Temp :- 37?C ; ; Pallor :- No ; Throat :- Congested ? Respiratory Examination:- =>HVB	M	46	2019-01-07 01:58:55	2019-01-07	GENERAL PRACTICE	ERYTHROMYCIN	Cough	Acute pharyngitis, unspecified	Acute pharyngitis, unspecified	Inappropriate	unnecessary	37	Barka PolyClinic
69	M	66	no	Cut wound.	Cut wound with knife on lt.ring finger. Small piece of skin removed.	? General Examination:- =>General Condition :- Looks Well	M	41	2019-01-08 14:32:07	2019-01-08	GENERAL PRACTICE	CLOXACILLIN	Injury, unspecified	Open wound of unspecified body region	Open wound of unspecified body region	Inappropriate	unnecessary	34	Barka PolyClinic
31.3	F	28.3	no	c/o dysurea and tonsillitis common cold		? General Examination:- =>BP :- 113/66 mmHg ; Temp :- 36?C ; ; General Condition :- Fair ; Dehydration :- No ; Throat :- Congested ? Respiratory Examination:- =>clear ? CVS Examination:- =>First Heart Sound:- Normal ; second Heart Sound:- Normal	F	53	2019-01-09 12:20:10	2019-01-09	GENERAL PRACTICE	CEPHALEXIN	Acute pharyngitis	Urinary Tract Infection	Urinary Tract Infection	Appropriate	Appropriate	32	Barka PolyClinic
74.8	F	71.8	no	old female arrived on wheel chair ...with knee pain,since long time urine burning .. known diabetic ,hypertensive on medications		? General Examination:- =>BP :- 110/64 mmHg ; Temp :- 36.6?C ; ; General Condition :- Fair ; Jaundice :- No ; Pallor :- No ; Clubbing :- No ; Cyanosis :- No ; Edema Feet :- No ; Dehydration :- No ? Respiratory Examination:- =>clear	F	48	2019-01-10 11:22:29	2019-01-10	GENERAL PRACTICE	CEPHALEXIN	Pain in limb	Urinary Tract Infection	Urinary Tract Infection	Appropriate	Appropriate	39	Barka PolyClinic
5.7	M	2.7	no	cough flu and fever since three days	cough flu and fever since three days	? General Examination:- =>Temp :- 36.6?C ; ; Weight :- 9Kg ; ; General Condition :- Fair ; Jaundice :- No ; Pallor :- No ; Clubbing :- No ; Throat :- Tonsillitis ? Respiratory Examination:- =>clear	F	48	2019-01-11 14:02:28	2019-01-11	GENERAL PRACTICE	AMOXYCILLIN	Acute upper respiratory infection, unspecified		Acute pharyngitis, unspecified	Inappropriate	unnecessary	33	Barka PolyClinic
33.2	F	30.2	EH	fever . diahrea and bodyache	fever . diahrea and bodyache since yesterday .. no vomiting . no abdominal colic	? General Examination:- =>BP :- 120/70 mmHg ; Temp :- 37.8?C ; ; RBS :- 6.3 ; Pulse :- 80bts/min ; Pallor :- No ; Cyanosis :- No ; Dehydration :- No ? Respiratory Examination:- =>clear ? Abdomen Examination:- =>soft	M	46	2019-01-12 14:56:40	2019-01-12	GENERAL PRACTICE	METRONIDAZOLE	Diarrhoea and gastroenteritis of presumed infectious origin		Gastroenteritis of presumed infectious origin	Appropriate	Appropriate	27	Barka PolyClinic
26.7	M	23.7	no	FEVER, COUGH AND COLD. SORE THROAT. SPUTUM +		? General Examination:- =>Temp :- 36.9?C ;	M	49	2019-01-13 11:34:01	2019-01-13	GENERAL PRACTICE	CEPHALEXIN	Pain in throat	Acute nasopharyngitis [common cold]	Acute pharyngitis, unspecified	Inappropriate	unnecessary	37	Barka PolyClinic
8.8	M	5.8	no	sorethroat pain // fever //cold symptoms since 2 days no vomiting no urinary or bowel complains no other complain		? General Examination:- =>Temp :- 37.9?C ; ; Weight :- 14Kg ; ; General Condition :- Fair ; Jaundice :- No ; Pallor :- No ; Throat :- Tonsillitis ? Respiratory Examination:- =>clear no added sounds	F	41	2019-01-16 00:24:27	2019-01-16	GENERAL PRACTICE	AMOXYCILLIN	Acute tonsillitis, unspecified		Acute tonsillitis, unspecified	Inappropriate	unnecessary	24	Barka PolyClinic
5.8	F	2.8	no	child w/ lt foot cut wound and pain?, fall/trauma while playing also not able to walk on foot, due to pain having subcuaneous swelling below the lt knee also limping in the rt foot good power in both the lower limbs		? General Examination:- =>General Condition :- Looks Well	M	33	2019-01-16 22:47:06	2019-01-16	GENERAL PRACTICE	CLOXACILLIN	Open wound of unspecified body region		Open wound of unspecified body region	Appropriate	Appropriate	27	Barka PolyClinic
6.5	F	3.5	no	Fever, cold.	^2-Year old baby girl, brought with history of fever, cold and cough....1 day. She has excessive smile?( normal milestones/development)	? General Examination:- =>Temp :- 36.1?C ; ; General Condition :- Fair ; Throat :- Tonsillitis ? Respiratory Examination:- =>Chest Shape :- Normal; Respiratory_distress :- No;Rhonchi :- No;Crepitation :- No;	M	41	2019-01-18 08:00:14	2019-01-18	GENERAL PRACTICE	AMOXYCILLIN	Acute tonsillitis, unspecified		Acute tonsillitis, unspecified	Inappropriate	unnecessary	25	Barka PolyClinic
6.3	F	3.3	no	cough and flu fever since three days		? General Examination:- =>Temp :- 36.6?C ; ; Weight :- 12Kg ; ; General Condition :- Looks Well ; Jaundice :- No ; Pallor :- No ; Throat :- Congested ? Respiratory Examination:- =>clear	F	48	2019-01-18 21:21:40	2019-01-18	GENERAL PRACTICE	AMOXYCILLIN	Acute upper respiratory infection, unspecified		Acute pharyngitis, unspecified	Inappropriate	unnecessary	43	Barka PolyClinic
11.5	M	8.5	no	fall from his bicycle lead to upper one tooth fall and other unstable tooth .. abrasiom scattred from nose.. elbows.. hands .. no limitation of movment per any limb .. no swelling or tenderness.. no loc or vomiting .. no head other injuries seen		? General Examination:- =>General Condition :- Fair ; Pallor :- No ; Cyanosis :- No ? Respiratory Examination:- =>clear ? Abdomen Examination:- =>soft	M	47	2019-01-19 18:19:09	2019-01-19	GENERAL PRACTICE	CLOXACILLIN	Injury, unspecified		Open wound of unspecified body region	Inappropriate	unnecessary	44	Barka PolyClinic
9.7	F	6.7	no	SMALL CUT WOUND ON THE CHIN DUE TO H/O FLL NO OTHER TRUMA , NO ANY COMPLAN		? General Examination:- =>General Condition :- Looks Well ; Jaundice :- No ; Pallor :- No	F	38	2019-01-21 19:09:47	2019-01-21	GENERAL PRACTICE	CLOXACILLIN	Injury, unspecified		Open wound of unspecified body region	Inappropriate	unnecessary	33	Barka PolyClinic
72.6	M	69.6	no	known hypertensive came with c/o high BP and nausea vomiting he checked at home found high BP. known case of hypertensive on medications from naseem hc	no chest pain no difficulty in breathing.. cough and fever flu since one days	? General Examination:- =>BP :- 145/68 mmHg ; Temp :- 37?C ; ; SPO2 :- 100 ; Pulse :- 62bts/min ; General Condition :- Fair ; Jaundice :- No ; Pallor :- No ; Clubbing :- No ; Cyanosis :- No ; Edema Feet :- No ? Respiratory Examination:- =>clear	F	48	2019-01-23 04:39:08	2019-01-23	GENERAL PRACTICE	CEPHALEXIN	Acute pharyngitis, unspecified		Acute pharyngitis, unspecified	Inappropriate	unnecessary	24	Barka PolyClinic
30.6	M	27.6	no	sore throat and c.cold	sore throat and c.cold sice night no fever no resp . distress .. no cough	? General Examination:- =>Pallor :- No ; Cyanosis :- No ; Dehydration :- No ; Throat :- Congested	M	46	2019-01-25 03:42:19	2019-01-25	GENERAL PRACTICE	CEPHALEXIN	Acute pharyngitis, unspecified		Acute pharyngitis, unspecified	Inappropriate	unnecessary	32	Barka PolyClinic
61.9	M	58.9	no	old baba , known dm on medication ,, came with c/o pain and swelling on the tip of the rt index finger after prick when he is test rbs , condition before 3 days no fever		? General Examination:- =>General Condition :- Fair ; Jaundice :- No ; Pallor :- No	F	38	2019-01-26 06:32:59	2019-01-26	GENERAL PRACTICE	CLOXACILLIN	Localized swelling, mass and lump, unspecified		Cutaneous abscess, furuncle and carbuncle, unspecified	Appropriate	Appropriate	41	Barka PolyClinic
26.3	F	23.3	no	sore throat with flu and fever	lesions arround lips ///one week healed	? General Examination:- =>Temp :- 36.6?C ; ; General Condition :- Looks Well ; Jaundice :- No ; Pallor :- No ; Clubbing :- No ; Cyanosis :- No ; Edema Feet :- No ; Throat :- Congested ? Respiratory Examination:- =>clerar	F	48	2019-01-27 11:02:45	2019-01-27	GENERAL PRACTICE	CEPHALEXIN	Acute nasopharyngitis [common cold]		Acute pharyngitis, unspecified	Inappropriate	unnecessary	20	Barka PolyClinic
64.1	F	61.1	no	fever with sore throat since yesterday flu and headache since yesterday	she is not diabetic not hypertensive	? General Examination:- =>General Condition :- Fair ; Jaundice :- No ; Pallor :- No ; Clubbing :- No ; Cyanosis :- No ; Throat :- Congested ? Respiratory Examination:- =>clear	F	48	2019-01-28 17:23:04	2019-01-28	GENERAL PRACTICE	CEPHALEXIN	Acute nasopharyngitis [common cold]		Acute pharyngitis, unspecified	Inappropriate	unnecessary	44	Barka PolyClinic
33.1	F	30.1	no	SORETHROAT .. FEVER MILD ON AND OFF .. COUGH ..COLD SYMPTOMS UNMARRIED		? General Examination:- =>Temp :- 36.9?C ; ; General Condition :- Fair ; Throat :- Congested	F	41	2019-01-29 17:03:34	2019-01-29	GENERAL PRACTICE	CEPHALEXIN	Acute pharyngitis, unspecified		Acute pharyngitis, unspecified	Inappropriate	unnecessary	35	Barka PolyClinic
8.1	F	5.1	no	history of fall	pt came complain of pain in the genital area after fall	? General Examination:- =>General Condition :- Fair ; Jaundice :- No ; Pallor :- No ; Throat :- Clear	M	35	2019-01-30 22:05:40	2019-01-30	GENERAL PRACTICE	AMOXYCILLIN	Injury, unspecified		Open wound of unspecified body region	Inappropriate	unnecessary	42	Barka PolyClinic
28	M	25	EH	diarrhoea ,vomiting and abdominal pain	c/o frequent watery diarrhoea w/o mucous or blood ,vomiting once and abdominal pain since last night after he took sandwich from resturant no h/o fever also h/o pain in left upper arm since > 1 wk no h/o trauma or fall	? General Examination:- =>BP :- 120/80 mmHg ; Temp :- 36.5?C ; ; General Condition :- Fair ; Jaundice :- No ; Pallor :- No ? Respiratory Examination:- =>clear	F	48	2019-02-01 07:25:55	2019-02-01	GENERAL PRACTICE	METRONIDAZOLE	Diarrhoea and gastroenteritis of presumed infectious origin		Gastroenteritis of presumed infectious origin	Appropriate	Appropriate	27	Barka PolyClinic
4.5	M	1.5	no	fever	fever started 2 days ago . o/e child tachypnic with intercostal retractionand wheezes allover the chest	? General Examination:- =>SPO2 :- 99 ; Pulse :- 173bts/min ; General Condition :- Fair ? Respiratory Examination:- =>Breath Sounds :- Vesicular;Rhonchi :- Yes;Crepitation :- No; tachypnea , intercostal retraction + wheezes over the chest	F	41	2019-02-02 08:33:34	2019-02-02	GENERAL PRACTICE	AUGMENTIN	Unspecified acute lower respiratory infection		Pneumonia	Appropriate	Appropriate	28	Barka PolyClinic
32.2	F	29.2	no	sore throat flu and fever since three days prenant...		? General Examination:- =>Temp :- 38?C ; ; General Condition :- Looks Well ; Jaundice :- No ; Pallor :- No ; Clubbing :- No ; Cyanosis :- No ; Edema Feet :- No ; Throat :- Tonsillitis ? Respiratory Examination:- =>clear	F	48	2019-02-03 11:45:43	2019-02-03	GENERAL PRACTICE	CEPHALEXIN	Acute pharyngitis, unspecified		Acute pharyngitis, unspecified	Inappropriate	unnecessary	26	Barka PolyClinic
61.2	M	58.2	neg	cough . fever . c.cold	cough . fever . c.cold since morning . no sob . no vomiting .. no chest pain .HX OF HTN, DM, CAD WITH PTCA, CHF?, CHRONIC LIVER DISEASE AND CKD, AS PER THE ATTENDANT, NO DOCUMENTS. FU AT SQUH F/u.	? General Examination:- =>Appearance :- 160 90 100 BP :- 160/90 mmHg ; Temp :- 38.2?C ; ; Pulse :- 100bts/min ? Respiratory Examination:- =>hvb	M	46	2019-02-04 20:52:34	2019-02-04	GENERAL PRACTICE	AMOXYCILLIN	Cough	Acute pharyngitis, unspecified	Acute pharyngitis, unspecified	Inappropriate	unnecessary	31	Barka PolyClinic
4.4	M	1.4	no	fever with cough and flu since two days	no drug allergy both eyes watery and mild discharge	? General Examination:- =>Temp :- 36.6?C ; ; Weight :- 7.6Kg ; ; General Condition :- Fair ; Jaundice :- No ; Pallor :- No ; Clubbing :- No ; Cyanosis :- No ; Edema Feet :- No ; Throat :- Congested ? Respiratory Examination:- =>harsh vesicular breathing	F	48	2019-02-05 21:15:58	2019-02-05	GENERAL PRACTICE	AMOXYCILLIN	Acute upper respiratory infection, unspecified		Acute pharyngitis, unspecified	Inappropriate	unnecessary	52	Barka PolyClinic
30.7	M	27.7	no	Lt submandibular pain and swelling	C/o Lt submandibular pain and swelling since 6 days ago. Noted redness on affected area. No other complaints.	? General Examination:- =>BP :- 110/60 mmHg ; Temp :- 36?C ; ; General Condition :- Fair ; Pallor :- No ; Cyanosis :- No ? Respiratory Examination:- =>Breath Sounds :- Vesicular;Rhonchi :- No;Crepitation :- No; ? Abdomen Examination:- =>soft	M	53	2019-02-07 10:33:16	2019-02-07	GENERAL PRACTICE	CLOXACILLIN	Cellulitis of face		Cellulitis, unspecified	Appropriate	Appropriate	31	Barka PolyClinic
23.8	M	20.8	no	FEVER AND SORE THROAT FOR 3 DAYS. RT EAR PAIN. ON OTOSCOPY, IMPACTED CERUMEN BILATERALLY.		? General Examination:- =>Temp :- 37.4?C ; ; Lymphadenopathy :- No ; Throat :- Congested ? Respiratory Examination:- =>NAD	M	49	2019-02-08 15:24:01	2019-02-08	GENERAL PRACTICE	CEPHALEXIN	Pain in throat	Acute nasopharyngitis [common cold]	Acute pharyngitis, unspecified	Inappropriate	unnecessary	43	Barka PolyClinic
7.1	M	4.1	no	complains of sore throat and fever for 2 days		? General Examination:- =>Temp :- 37?C ; ; Weight :- 14.2Kg ; ; General Condition :- Looks Well ; Jaundice :- No ; Pallor :- No ; Throat :- Tonsillitis ? Respiratory Examination:- =>clear	M	33	2019-02-09 19:09:07	2019-02-09	GENERAL PRACTICE	AMOXYCILLIN	Acute tonsillitis, unspecified		Acute tonsillitis, unspecified	Inappropriate	unnecessary	49	Barka PolyClinic
34.6	F	31.6	no	c/o fever common cold sore throat cough since 3 d		? General Examination:- =>BP :- 111/78 mmHg ; Temp :- 36.3?C ; ; General Condition :- Fair ; Dehydration :- No ; Throat :- Congested ? Respiratory Examination:- =>Chest Shape :- Normal; Respiratory_distress :- No;Chest movement :- Normal;Rhonchi :- No;Crepitation :- No; ? CVS Examination:- =>First Heart Sound:- Normal ; second Heart Sound:- Normal	F	53	2019-02-11 08:22:16	2019-02-11	GENERAL PRACTICE	ERYTHROMYCIN	Acute upper respiratory infection, unspecified	Acute pharyngitis	Acute pharyngitis, unspecified	Inappropriate	unnecessary	33	Barka PolyClinic
26.7	F	23.7	no	sorethroat //fever // bodyaches since yesterday		? General Examination:- =>Temp :- 36.9?C ; ; General Condition :- Fair ; Throat :- Congested	F	41	2019-02-12 13:43:38	2019-02-12	GENERAL PRACTICE	CEPHALEXIN	Acute pharyngitis, unspecified		Acute pharyngitis, unspecified	Inappropriate	unnecessary	39	Barka PolyClinic
12.4	M	9.4	no	otits media 1 d		? General Examination:- =>Throat :- Clear ? CNS Examination:- =>otitis media rt side	M	60	2019-02-13 23:29:51	2019-02-13	GENERAL PRACTICE	AMOXYCILLIN	Otitis media, unspecified		Otitis media, unspecified	Appropriate	Appropriate	33	Barka PolyClinic
5.8	F	2.8	no	cough flu		? General Examination:- =>General Condition :- Fair ; Throat :- Tonsillitis temp 37 ? Respiratory Examination:- =>clear ? CVS Examination:- =>nad	F	36	2019-02-15 10:14:59	2019-02-15	GENERAL PRACTICE	AMOXYCILLIN	Acute tonsillitis, unspecified		Acute tonsillitis, unspecified	Inappropriate	unnecessary	31	Barka PolyClinic
5.3	M	2.3	no	lt ear discharge since two days fever since two days both eyes discharge	on exam pus discharge from rt ear	? General Examination:- =>Weight :- 8.7Kg ; ; General Condition :- Fair ; Jaundice :- No ; Pallor :- No ; Clubbing :- No ; Cyanosis :- No ; Edema Feet :- No ? Respiratory Examination:- =>clear	F	48	2019-02-16 19:30:10	2019-02-16	GENERAL PRACTICE	AUGMENTIN	Otitis media, unspecified		Otitis media, unspecified	Appropriate	Appropriate	36	Barka PolyClinic
47.7	M	44.7	no	mild abrasion of the left thumb. bitten by a dog.			M	49	2019-02-17 21:10:36	2019-02-17	GENERAL PRACTICE	AMOXYCILLIN	Bitten or struck by dog at Unspecified place	Infected wound	Infected wound	Appropriate	Appropriate	40	Barka PolyClinic
37.8	F	34.8	no	rt earache with d/c no ari --------- o/e : ear : pus d/c congestion		? General Examination:- =>Temp :- 36.6?C ; ; General Condition :- Fair ; Throat :- Congested ? Respiratory Examination:- =>clear	F	36	2019-02-18 22:54:38	2019-02-18	GENERAL PRACTICE	CEPHALEXIN	Otitis media, unspecified		Otitis media, unspecified	Appropriate	Appropriate	35	Barka PolyClinic
26.3	F	23.3	wbc in urine	c/o loin pain left side mainly but at times also the right side no fever // no nausea or vomiting denies pregnancy ========== also having acne over the face and upper back		? General Examination:- =>General Condition :- Fair	F	41	2019-02-20 09:22:21	2019-02-20	GENERAL PRACTICE	AMOXYCILLIN	Other and unspecified abdominal pain	Urinary Tract Infection	Urinary Tract Infection	Appropriate	Appropriate	32	Barka PolyClinic
48.3	F	45.3	no	41 yr old female, no PMHx presented with rt gluteal area swelling no d/c no fever		swelling 1 cm , not tender, erythmatous	F	28	2019-02-21 21:06:02	2019-02-21	GENERAL PRACTICE	CLOXACILLIN	Localized swelling, mass and lump, lower limb		Cutaneous abscess, furuncle and carbuncle, unspecified	Appropriate	Appropriate	34	Barka PolyClinic
25.1	F	22.1	no	sore throat. left ear pain. impression: acute follicular tonsillitis.		? General Examination:- =>Temp :- 36.5?C ; ; Lymphadenopathy :- Yes ? Respiratory Examination:- =>nad	M	49	2019-02-23 03:42:43	2019-02-23	GENERAL PRACTICE	CEPHALEXIN	Pain in throat	acute follicular tonsillitis	Acute tonsillitis, unspecified	Appropriate	Appropriate	26	Barka PolyClinic
68.8	M	65.8	no	throat pain	C/o throat pain since a week ago. Also with some itchiness in the throat. No cough nor colds. No fever. No other complaints.	? General Examination:- =>BP :- 110/60 mmHg ; Temp :- 36.7?C ; ; General Condition :- Fair ; Pallor :- No ; Cyanosis :- No ; Throat :- Congested ? Respiratory Examination:- =>Breath Sounds :- Vesicular;Rhonchi :- No;Crepitation :- No; ? Abdomen Examination:- =>soft	M	53	2019-02-24 10:57:04	2019-02-24	GENERAL PRACTICE	CEPHALEXIN	Acute pharyngitis, unspecified		Acute pharyngitis, unspecified	Inappropriate	unnecessary	38	Barka PolyClinic
37.7	F	34.7	pos wbc in stool	c/o diarrhoea as wetary diarrhoea since 2 d no blood at stool no vomting no h/o food from outside ..no similear condition at famaily lmp.....21/2/19...for 2 days no bsm used she is p4...lcb 3 y nearly		? General Examination:- =>BP :- 110/76 mmHg ; Temp :- 36?C ; ; General Condition :- Fair ; Dehydration :- No	F	53	2019-02-25 09:21:10	2019-02-25	GENERAL PRACTICE	CEPHALEXIN	Diarrhoea and gastroenteritis of presumed infectious origin		Gastroenteritis of presumed infectious origin	Inappropriate	incorrect spectrum of antibiotic	17	Barka PolyClinic
38.4	M	35.4	EH	came for lab investigations			F	48	2019-02-26 17:37:53	2019-02-26	GENERAL PRACTICE	METRONIDAZOLE	Laboratory examination	Diarrhoea and gastroenteritis of presumed infectious origin	Gastroenteritis of presumed infectious origin	Appropriate	Appropriate	36	Barka PolyClinic
17.9	M	14.9	no	pain and swelling on the base of penile shaft	C/o pain and swelling on the base of penile shaft since 2 days ago. Also with redness. No dysuria. Pt having hyperpigmented lesion on the face since a week ago. Claims no itchiness. No other complaints.	? General Examination:- =>Temp :- 36.8?C ; ; General Condition :- Fair ; Pallor :- No ; Cyanosis :- No ? Respiratory Examination:- =>Breath Sounds :- Vesicular;Rhonchi :- No;Crepitation :- No; ? Abdomen Examination:- =>soft	M	53	2019-02-27 16:04:45	2019-02-27	GENERAL PRACTICE	CLOXACILLIN	Pain, unspecified	Cellulitis, unspecified	Cellulitis, unspecified	Appropriate	Appropriate	31	Barka PolyClinic
5.2	M	2.2	no	fish bone stuck in throat c/o nausia and throat pain o/e : no fish bone seen tonsils enlarged -------- xray no fish bone visible		? General Examination:- =>General Condition :- Fair ; Throat :- Tonsillitis	F	36	2019-02-28 18:00:00	2019-02-28	GENERAL PRACTICE	AMOXYCILLIN	Pain in throat		Pain in throat	Inappropriate	unnecessary	26	Barka PolyClinic
6.8	M	3.8	no	Fall.	Occipital laciration post fall...no loc, sutured under L:/A.	? General Examination:- =>General Condition :- Looks Well	M	41	2019-03-01 19:06:06	2019-03-01	GENERAL PRACTICE	CLOXACILLIN	Pain, unspecified	Open wound of unspecified body region	Open wound of unspecified body region	Inappropriate	unnecessary	34	Barka PolyClinic
6	F	3	no	fever with cough	fever with cough started yesterday	? General Examination:- =>Temp :- 38.4?C ; ; General Condition :- Fair ; Throat :- Congested ? Respiratory Examination:- =>Breath Sounds :- Vesicular;Rhonchi :- No;Crepitation :- No;	M	34	2019-03-02 19:55:59	2019-03-02	GENERAL PRACTICE	CEPHALEXIN	Acute upper respiratory infection, unspecified		Acute pharyngitis, unspecified	Inappropriate	unnecessary	44	Barka PolyClinic
12.3	F	9.3	neg	vomiting once with fever ... came yesterday		? General Examination:- =>Temp :- 39?C ; ; Weight :- 21Kg ; ; Pallor :- No ; Cyanosis :- No ; Dehydration :- No ; Throat :- Congested ? Respiratory Examination:- =>harsh vesicular breath sounds ? CVS Examination:- =>nad	M	47	2019-03-04 04:21:18	2019-03-04	GENERAL PRACTICE	CEPHALEXIN	Acute pharyngitis, unspecified		Acute pharyngitis, unspecified	Inappropriate	unnecessary	15	Barka PolyClinic
66.8	F	63.8	no	c/ocough sore throat common cold no h/o tb contact no h/o travel		? General Examination:- =>BP :- 132/75 mmHg ; Temp :- 36.1?C ; ; SPO2 :- 100 ; General Condition :- Fair ; Cyanosis :- No ; Dehydration :- No ; Throat :- Congested ? Respiratory Examination:- =>clear ? CVS Examination:- =>First Heart Sound:- Normal ; second Heart Sound:- Normal	F	53	2019-03-05 08:02:45	2019-03-05	GENERAL PRACTICE	ERYTHROMYCIN	Acute upper respiratory infection, unspecified	Acute pharyngitis	Acute pharyngitis, unspecified	Inappropriate	unnecessary	40	Barka PolyClinic
27.8	F	24.8	no	c/o tonsillitis common cold cough		? General Examination:- =>BP :- 119/66 mmHg ; Temp :- 36.6?C ; ; General Condition :- Fair ; Cyanosis :- No ; Dehydration :- No ; Throat :- Tonsillitis ? Respiratory Examination:- =>clear ? CVS Examination:- =>First Heart Sound:- Normal ; second Heart Sound:- Normal	F	53	2019-03-06 11:55:37	2019-03-06	GENERAL PRACTICE	CEPHALEXIN	Acute tonsillitis, unspecified		Acute tonsillitis, unspecified	Inappropriate	unnecessary	35	Barka PolyClinic
6	F	3	no	urti	fever ,cough and cold since 4 days no sob k/c g6pdd	? General Examination:- =>Temp :- 36.5?C ; ; General Condition :- Looks Well ; Jaundice :- No ; Pallor :- No ; Throat :- Congested ? Respiratory Examination:- =>clear	M	52	2019-03-07 20:47:33	2019-03-07	GENERAL PRACTICE	CEPHALEXIN	Acute upper respiratory infection, unspecified		Acute pharyngitis, unspecified	Inappropriate	unnecessary	30	Barka PolyClinic
32.8	M	29.8	no	general body ache 1 day ago .. mild fever .. no any other complain		? General Examination:- =>BP :- 136/94 mmHg ; Temp :- 38?C ; ; Pulse :- 112bts/min ; General Condition :- Fair ; Pallor :- No ; Cyanosis :- No ; Dehydration :- No ; Throat :- Congested ? Respiratory Examination:- =>clear	M	47	2019-03-08 19:24:25	2019-03-08	GENERAL PRACTICE	CEPHALEXIN	Fever, unspecified	Acute pharyngitis, unspecified	Acute pharyngitis, unspecified	Inappropriate	unnecessary	36	Barka PolyClinic
21.8	M	18.8	no	cough flu and fever since one day.		? General Examination:- =>General Condition :- Fair ; Jaundice :- No ; Pallor :- No ; Clubbing :- No ; Cyanosis :- No ; Throat :- Congested	F	48	2019-03-09 20:42:22	2019-03-09	GENERAL PRACTICE	CEPHALEXIN	Acute nasopharyngitis [common cold]		Acute pharyngitis, unspecified	Inappropriate	unnecessary	47	Barka PolyClinic
11	F	8	no	urti	cough,cold and sorethroat since 2 days	? General Examination:- =>Temp :- 36.7?C ; ; General Condition :- Looks Well ; Jaundice :- No ; Pallor :- No ; Throat :- Congested ? Respiratory Examination:- =>clear	M	52	2019-03-10 22:15:18	2019-03-10	GENERAL PRACTICE	CEPHALEXIN	Acute upper respiratory infection, unspecified		Acute pharyngitis, unspecified	Inappropriate	unnecessary	41	Barka PolyClinic
23.7	F	20.7	no	colicky abd pain since morning ,, associated with loose motions watery multiple episodes vomiting 3 episodes ,, fever ,, sorethroat + no other complain		? General Examination:- =>Temp :- 37.8?C ; ; General Condition :- Fair ; Jaundice :- No ; Pallor :- No ; Dehydration :- No ; Throat :- Congested ? Respiratory Examination:- =>clear ? Abdomen Examination:- =>Soft :- Yes; non tender	F	41	2019-03-11 19:28:28	2019-03-11	GENERAL PRACTICE	CEPHALEXIN	Diarrhoea and gastroenteritis of presumed infectious origin		Gastroenteritis of presumed infectious origin	Inappropriate	unnecessary	34	Barka PolyClinic
34.3	M	31.3	no	urti	c/o fever cough and sorethroat since today no sob h/o recent urti and was treated with antibiotic		M	52	2019-03-12 21:09:10	2019-03-12	GENERAL PRACTICE	AMOXYCILLIN	Acute upper respiratory infection, unspecified		Acute pharyngitis, unspecified	Inappropriate	unnecessary	24	Barka PolyClinic
6	M	3	no	ari	h/o fever and cough since 3 days no sob no h/o asthama	? General Examination:- =>Temp :- 37.7?C ; ; Weight :- 13Kg ; ; Jaundice :- No ; Pallor :- No ; Throat :- Congested ? Respiratory Examination:- =>harsh vesicular breathing ? Abdomen Examination:- =>soft	M	52	2019-03-14 05:29:57	2019-03-14	GENERAL PRACTICE	AMOXYCILLIN	Acute bronchitis, unspecified		Acute bronchitis, unspecified	Inappropriate	unnecessary	36	Barka PolyClinic
6.9	F	3.9	no	CROUPY COUGH SINCE FEW HOURS NO FEVER ALSO HAVE SMALL INJURY ON THE RT 2ND TOE DUE TOP UNKNOWM TRUMA AND UNKNOW TIME		? General Examination:- =>General Condition :- Fair ; Jaundice :- No ; Pallor :- No ; Throat :- Congested ? Respiratory Examination:- =>TRANSMITID SOUND	F	38	2019-03-15 01:21:26	2019-03-15	GENERAL PRACTICE	AMOXYCILLIN	Acute obstructive laryngitis [croup]		Acute laryngitis	Inappropriate	unnecessary	22	Barka PolyClinic
8.2	M	5.2	no	Fall	Fall at home, same level, for head trauma. small laciration on rt.side of forhead- applied Glue.		M	41	2019-03-16 00:24:19	2019-03-16	GENERAL PRACTICE	CLOXACILLIN	Injury, unspecified	Open wound of unspecified body region	Open wound of unspecified body region	Inappropriate	unnecessary	17	Barka PolyClinic
6.3	F	3.3	no	fever ,, sorethroat since 2 days no vomiting or diarrhea no other complain		? General Examination:- =>Temp :- 38.3?C ; ; Weight :- 11Kg ; ; General Condition :- Fair ; Jaundice :- No ; Pallor :- No ; Throat :- Tonsillitis ? Respiratory Examination:- =>clear	F	41	2019-03-17 00:59:43	2019-03-17	GENERAL PRACTICE	AMOXYCILLIN	Acute tonsillitis, unspecified		Acute tonsillitis, unspecified	Inappropriate	unnecessary	22	Barka PolyClinic
63.7	M	60.7	no	ari	cough,running nose since 3 days no neck rigidity no vomiting no dyspnoea no skin rashes bowel habit normal	? General Examination:- =>Temp :- 36.8?C ; ; General Condition :- Fair ; Jaundice :- No ; Pallor :- No ; Clubbing :- No ; Cyanosis :- No ; Edema Feet :- No ; Dehydration :- No ? Respiratory Examination:- =>clear	M	46	2019-03-18 11:23:00	2019-03-18	GENERAL PRACTICE	CEPHALEXIN	Acute upper respiratory infection, unspecified	Acute nasopharyngitis [common cold]	Acute pharyngitis, unspecified	Inappropriate	unnecessary	26	Barka PolyClinic
11.9	F	8.9	no	sore throat with fever since one day suturing at lower lip at rustaq hostpital...done one month back ,not bring and discharge advised	on exam absorble sutures ...lower lip no redness no singns of infection seen	? General Examination:- =>Temp :- 36.6?C ; ; General Condition :- Looks Well ; Jaundice :- No ; Pallor :- No ; Clubbing :- No ; Cyanosis :- No ; Throat :- Congested ? Respiratory Examination:- =>clear	F	48	2019-03-19 19:37:40	2019-03-19	GENERAL PRACTICE	AMOXYCILLIN	Acute upper respiratory infection, unspecified		Acute pharyngitis, unspecified	Inappropriate	unnecessary	52	Barka PolyClinic
4.7	M	1.7	no	cough since 4 days flu since 4 days no fever	child has been seen at afh ,given syp cough not relieved	? General Examination:- =>Temp :- 36.6?C ; ; Weight :- 12.2Kg ; ; General Condition :- Fair ; Jaundice :- No ; Pallor :- No ; Clubbing :- No ; Cyanosis :- No ; Edema Feet :- No ; Dehydration :- No ; Throat :- Congested ? Respiratory Examination:- =>harsh vesicular breathing	F	48	2019-03-20 19:01:24	2019-03-20	GENERAL PRACTICE	AMOXYCILLIN	Acute upper respiratory infection, unspecified		Acute pharyngitis, unspecified	Inappropriate	unnecessary	25	Barka PolyClinic
10.7	F	7.7	no	proxy. known case of VUR, the attendant is here for prophylactic antibiotic.		? General Examination:- =>Appearance :- pt not seen.	M	49	2019-03-21 23:50:42	2019-03-21	GENERAL PRACTICE	CEPHALEXIN	Issue of repeat prescription		Issue of repeat prescription	Inappropriate	unnecessary	23	Barka PolyClinic
25.8	F	22.8	no	Cut wound on sole of lt.foot by piece of glass. she refuse for sutures.			M	41	2019-03-22 23:40:35	2019-03-22	GENERAL PRACTICE	CLOXACILLIN	Pain in limb	Open wound of unspecified body region	Open wound of unspecified body region	Appropriate	Appropriate	41	Barka PolyClinic
39.5	F	36.5	neg	fever abd pain			M	60	2019-03-24 22:44:19	2019-03-24	GENERAL PRACTICE	AMOXYCILLIN	Fever, unspecified		Fever, unspecified	Inappropriate	unnecessary	47	Barka PolyClinic
7.6	M	4.6	no	rt big toe pain due to brick by niddle tody no fever		? General Examination:- =>General Condition :- Fair ; Jaundice :- No ; Pallor :- No	F	38	2019-03-24 00:06:19	2019-03-24	GENERAL PRACTICE	CLOXACILLIN	Injury, unspecified		Open wound of unspecified body region	Inappropriate	unnecessary	23	Barka PolyClinic
9.2	M	6.2	no	cough flu		? General Examination:- =>General Condition :- Fair ; Throat :- Congested ? Respiratory Examination:- =>hvb ? CVS Examination:- =>nad	F	36	2019-03-25 23:15:24	2019-03-25	GENERAL PRACTICE	AMOXYCILLIN	Acute upper respiratory infection, unspecified		Acute pharyngitis, unspecified	Inappropriate	unnecessary	37	Barka PolyClinic
33.8	F	30.8	no	fever, cough, colds	C/o fever with cough and colds since a week ago. No other complaints. Denies pregnancy.	? General Examination:- =>BP :- 120/80 mmHg ; Temp :- 37?C ; ; General Condition :- Fair ; Pallor :- No ; Cyanosis :- No ; Throat :- Congested ? Respiratory Examination:- =>occ rhonchi BLF	M	53	2019-03-27 19:52:35	2019-03-27	GENERAL PRACTICE	CEPHALEXIN	Acute upper respiratory infection, unspecified		Acute pharyngitis, unspecified	Inappropriate	unnecessary	47	Barka PolyClinic
27.4	F	24.4	no	headcahe . c.cold and fever	headcahe . c.cold and fever sine night ..	? General Examination:- =>BP :- 120/80 mmHg ; Temp :- 37.8?C ; ; Pulse :- 100bts/min ; Pallor :- No ; Throat :- Congested	M	46	2019-03-28 23:06:52	2019-03-28	GENERAL PRACTICE	CEPHALEXIN	Fever, unspecified	Acute pharyngitis, unspecified	Acute pharyngitis, unspecified	Inappropriate	unnecessary	22	Barka PolyClinic
4.4	M	1.4	no	cough . c.cold	cough . c.cold since yesterday night . no fever . no resp ..distress	? General Examination:- =>Temp :- 36?C ; ; Pallor :- No ; Cyanosis :- No ; Throat :- Congested ? Respiratory Examination:- =>clear	M	49.3	2019-03-29 18:53:06	2019-03-29	GENERAL PRACTICE	AMOXYCILLIN	Acute upper respiratory infection, unspecified		Acute pharyngitis, unspecified	Inappropriate	unnecessary	18	Barka PolyClinic
38.8	F	35.8	no	LF FOOT PAIN DUE TO BRICK BY NIDDLE TODY NO OTHER COMPLAIN		? General Examination:- =>General Condition :- Fair ; Jaundice :- No ; Pallor :- No	F	38	2019-03-29 23:44:48	2019-03-29	GENERAL PRACTICE	CLOXACILLIN	Superficial injury of ankle and foot, unspecified		Open wound of unspecified body region	Inappropriate	unnecessary	41	Barka PolyClinic
6.4	F	3.4	no	fever . cough and c.cold	fever . cough and c.cold dinc etwo days .. no vomiting . no resp/ distress	? General Examination:- =>Temp :- 38?C ; ; Pallor :- No ; Throat :- Tonsillitis ? Respiratory Examination:- =>clear	M	46	2019-03-31 01:30:18	2019-03-31	GENERAL PRACTICE	AMOXYCILLIN	Acute pharyngitis, unspecified		Acute pharyngitis, unspecified	Inappropriate	unnecessary	17	Barka PolyClinic
5.7	F	2.7	no	cough ,, common cold ,, nasal congestion known SCD ,, no g6pd ,, no h/o asthma no other complain		? General Examination:- =>Weight :- 12.4Kg ; ; General Condition :- Fair ; Jaundice :- No ; Pallor :- No ; Throat :- Congested ? Respiratory Examination:- =>conducted sounds	F	44.1	2019-04-01 20:55:39	2019-04-01	GENERAL PRACTICE	AMOXYCILLIN	Acute upper respiratory infection, unspecified		Acute pharyngitis, unspecified	Inappropriate	unnecessary	40	Barka PolyClinic
67.3	F	64.3	no	C/O COMMON COLD SORE THROAT AND DRY COUGH SINCE 5 D NEARLY NO OTHER COMPLAIN		? General Examination:- =>BP :- 138/77 mmHg ; Temp :- 36?C ; ; General Condition :- Fair ; Dehydration :- No ; Throat :- Congested ? Respiratory Examination:- =>Chest Shape :- Normal; Respiratory_distress :- No;Chest movement :- Normal;Rhonchi :- No;Crepitation :- No; ? CVS Examination:- =>First Heart Sound:- Normal ; second Heart Sound:- Normal	F	53	2019-04-01 09:14:47	2019-04-01	GENERAL PRACTICE	ERYTHROMYCIN	Acute upper respiratory infection, unspecified	Acute pharyngitis	Acute pharyngitis, unspecified	Inappropriate	unnecessary	43	Barka PolyClinic
75.8	F	72.8	no	72 yrs lady with H/O HTN came c/o loose motions since yesterday with abd colick ,, FU in aldiwan for her HTN no vomiting ,, mild fever on and off no other chronic illness no any chest complains		? General Examination:- =>BP :- 135/73 mmHg ; Temp :- 37.5?C ; ; SPO2 :- 96 ; RBS :- 4.6 ; Pulse :- 94bts/min ; General Condition :- Fair ; Jaundice :- No ; Pallor :- No ; Dehydration :- No ? Respiratory Examination:- =>clear ? Abdomen Examination:- =>soft central tenderness ,, periumbilical ,, ? CVS Examination:- =>First Heart Sound:- Normal ; second Heart Sound:- Normal ? CNS Examination:- =>nad	F	41	2019-04-02 16:15:56	2019-04-02	GENERAL PRACTICE	METRONIDAZOLE	Diarrhoea and gastroenteritis of presumed infectious origin		Gastroenteritis of presumed infectious origin	Inappropriate	unnecessary	42	Barka PolyClinic
42	F	39	no	no PMH hx of tonsilitis seen yestrday and antibiotic given still having sor throt , fever mild cough no c.cold as per the pt she when ever she use the Amoxycillin she is not imprvening , requsted to change the antibiotic		? General Examination:- =>General Condition :- Fair ; Pallor :- No ; Cyanosis :- No ; Dehydration :- No ; Throat :- Tonsillitis temp39 ? Respiratory Examination:- =>clear ? CNS Examination:- =>intact	F	30	2019-04-03 14:37:34	2019-04-03	GENERAL PRACTICE	CEPHALEXIN	Acute tonsillitis, unspecified		Acute tonsillitis, unspecified	Inappropriate	unnecessary	26	Barka PolyClinic
6.6	F	3.6	no	hx of sor throt , fever , cough , c.cold , vomitted twice since 3 day normal bowl habite hx of contact with family member no hx of eatting out side		? General Examination:- =>General Condition :- Poor ; Pallor :- No ; Cyanosis :- No ; Dehydration :- No ; Throat :- Tonsillitis ? Respiratory Examination:- =>clear ? CVS Examination:- =>s1s2 ? CNS Examination:- =>intact	F	30	2019-04-04 12:31:51	2019-04-04	GENERAL PRACTICE	AMOXYCILLIN	Acute upper respiratory infection, unspecified		Acute pharyngitis, unspecified	Inappropriate	unnecessary	39	Barka PolyClinic
42.3	M	39.3	no	cough since yesterday sob no fever		? General Examination:- =>General Condition :- Fair ; Throat :- Tonsillitis ? Respiratory Examination:- =>wheeze ? CVS Examination:- =>nad	F	36	2019-04-05 02:13:22	2019-04-05	GENERAL PRACTICE	CEPHALEXIN	Asthma, unspecified		Asthma, unspecified	Inappropriate	unnecessary	26	Barka PolyClinic
4.1	F	1.1	no	fever ,, common cold,, pain in throat ,, 2 days no vomiting or diarrhea no other complain		? General Examination:- =>Temp :- 38.5?C ; ; General Condition :- Fair ; Jaundice :- No ; Pallor :- No ; Throat :- Congested	F	41	2019-04-06 00:04:47	2019-04-06	GENERAL PRACTICE	AMOXYCILLIN	Acute pharyngitis, unspecified		Acute pharyngitis, unspecified	Inappropriate	unnecessary	42	Barka PolyClinic
9.5	F	6.5	no	COUGH .. EYE REDNESS AND D/C		? General Examination:- =>General Condition :- Fair ; Throat :- Congested TEMP 36.7 ? Respiratory Examination:- =>CLEAR ? CVS Examination:- =>NAD	F	36	2019-04-06 20:10:53	2019-04-06	GENERAL PRACTICE	CEPHALEXIN	Acute upper respiratory infection, unspecified		Acute pharyngitis, unspecified	Inappropriate	unnecessary	43	Barka PolyClinic
58.4	M	55.4	no	urti	fever with chills ,cough and cold since 3 days seen at private clinic took medication but no releif h/o travelling to INDIA and came back 2 wks ago no h/o sob ,no h/o contact with any sick pt	? General Examination:- =>BP :- 110/70 mmHg ; Temp :- 36.8?C ; ; RBS :- 9.8 ; General Condition :- Fair ; Jaundice :- No ; Pallor :- No ; Throat :- Congested ? Respiratory Examination:- =>clear ? Abdomen Examination:- =>soft	M	52	2019-04-07 20:01:04	2019-04-07	GENERAL PRACTICE	CEPHALEXIN	Acute upper respiratory infection, unspecified		Acute pharyngitis, unspecified	Inappropriate	unnecessary	52	Barka PolyClinic
9.8	F	6.8	no	acute tonsillitis	fever , sore trhoat . c.cold since two days .. also c/o inc . frequency of urine since yesterday .. no adominal pain	? General Examination:- =>Temp :- 38?C ; ; Pallor :- No ; Throat :- Clear ? Respiratory Examination:- =>clear	M	46	2019-04-08 23:36:57	2019-04-08	GENERAL PRACTICE	CEPHALEXIN	Acute tonsillitis, unspecified		Acute tonsillitis, unspecified	Inappropriate	unnecessary	38	Barka PolyClinic
19.9	F	16.9	no	sorethroat ,, common cold // 2 days ,, headache , bodyaches		? General Examination:- =>Temp :- 36.9?C ; ; General Condition :- Fair ; Jaundice :- No ; Pallor :- No ; Throat :- Congested	F	41	2019-04-10 11:23:28	2019-04-10	GENERAL PRACTICE	CEPHALEXIN	Acute pharyngitis, unspecified		Acute pharyngitis, unspecified	Inappropriate	unnecessary	35	Barka PolyClinic
25.4	F	22.4	no	loose motion with vomiting abd pain dysuria		? General Examination:- =>General Condition :- Fair ? Respiratory Examination:- =>clear ? Abdomen Examination:- =>Soft :- Yes; ? CVS Examination:- =>nad	F	36	2019-04-11 17:56:56	2019-04-11	GENERAL PRACTICE	METRONIDAZOLE	Diarrhoea and gastroenteritis of presumed infectious origin		Gastroenteritis of presumed infectious origin	Inappropriate	unnecessary	30	Barka PolyClinic
8.3	M	5.3	no	rt eye upper lid swelling no ari no itching no redness			F	36	2019-04-12 13:16:03	2019-04-12	GENERAL PRACTICE	CLOXACILLIN	Hordeolum and other deep inflammation of eyelid		Chalazion	Inappropriate	unnecessary	36	Barka PolyClinic
5.5	M	2.5	no	fever , cough and c.cold	fever , cough and c.cold since two days . no vomiting . no resp .. Distress	? General Examination:- =>Temp :- 37.1?C ; ; Pallor :- No ; Cyanosis :- No ; Throat :- Congested ? Respiratory Examination:- =>clear	M	46	2019-04-13 07:41:17	2019-04-13	GENERAL PRACTICE	AMOXYCILLIN	Acute upper respiratory infection, unspecified		Acute pharyngitis, unspecified	Inappropriate	unnecessary	37	Barka PolyClinic
12	M	9	no	ARI, acute		? General Examination:- =>Temp :- 37.8?C ; ; General Condition :- Looks Well ; Throat :- Tonsillitis ? Respiratory Examination:- =>clear	M	33	2019-04-14 04:35:56	2019-04-14	GENERAL PRACTICE	AMOXYCILLIN	Acute tonsillitis, unspecified		Acute tonsillitis, unspecified	Inappropriate	unnecessary	13	Barka PolyClinic
24.7	F	21.7	no	cough ,, common cold ,, headache since 1 week no h/o asthma or scd or g6pd ,, not on any medications no other complain		? General Examination:- =>General Condition :- Fair ; Jaundice :- No ; Pallor :- No ; Throat :- Congested ? Respiratory Examination:- =>clear	F	41	2019-04-15 16:26:21	2019-04-15	GENERAL PRACTICE	CEPHALEXIN	Cough		Cough	Inappropriate	unnecessary	43	Barka PolyClinic
5.5	F	2.5	no	cough and cold w/ fever for 2 days		? General Examination:- =>Temp :- 37.8?C ; ; General Condition :- Looks Well ; Jaundice :- No ; Pallor :- No ; Throat :- Congested ? Respiratory Examination:- =>clear	M	33	2019-04-16 15:40:24	2019-04-16	GENERAL PRACTICE	AMOXYCILLIN	Acute upper respiratory infection, unspecified		Acute pharyngitis, unspecified	Inappropriate	unnecessary	35	Barka PolyClinic
15.2	M	12.2	no	urti	fever ,cough ,cold and chest discomfort since today also c/o dental pain since today	? General Examination:- =>Temp :- 36.8?C ; ; General Condition :- Looks Well ; Jaundice :- No ; Pallor :- No ; Throat :- Congested ? Respiratory Examination:- =>clear ? Abdomen Examination:- =>soft ? CVS Examination:- =>nad	M	52	2019-04-17 23:00:33	2019-04-17	GENERAL PRACTICE	AMOXYCILLIN	Acute upper respiratory infection, unspecified		Acute pharyngitis, unspecified	Inappropriate	unnecessary	45	Barka PolyClinic
11.5	F	8.5	no	sore throat	pt came complain of sore throat asso with fever and vomiting for 1day	? General Examination:- =>Temp :- 38.7?C ; ; General Condition :- Fair ; Jaundice :- No ; Pallor :- No ; Throat :- Tonsillitis ? Respiratory Examination:- =>Breath Sounds :- Vesicular;Rhonchi :- No;Crepitation :- No;	M	35	2019-04-19 22:46:48	2019-04-19	GENERAL PRACTICE	AUGMENTIN	Acute tonsillitis, unspecified		Acute tonsillitis, unspecified	Inappropriate	unnecessary	46	Barka PolyClinic
9	F	6	no	fever with cough and flu since two days given paracetamol at home not relieved	no allergy with drugs. child having convergent squint..advised to follow at eye clinic	? General Examination:- =>Temp :- 39.3?C ; ; Weight :- 20.3Kg ; ; Jaundice :- No ; Pallor :- No ; Clubbing :- No ; Cyanosis :- No ; Edema Feet :- No ; Throat :- Congested ? Respiratory Examination:- =>clear	F	48	2019-04-19 02:09:44	2019-04-19	GENERAL PRACTICE	AMOXYCILLIN	Acute upper respiratory infection, unspecified		Acute pharyngitis, unspecified	Inappropriate	unnecessary	24	Barka PolyClinic
5.5	F	2.5	no	fall cut in rt forehead no LOC no v		3/0 silk 2 LA	M	60	2019-04-20 21:03:56	2019-04-20	GENERAL PRACTICE	CLOXACILLIN	Superficial injury of unspecified body region		Open wound of unspecified body region	Inappropriate	unnecessary	58	Barka PolyClinic
17.6	M	14.6	no	lt forehead cut wound, laceration given 2 sutures using 3"0 silk under la		? General Examination:- =>Weight :- 37.4Kg ; ; General Condition :- Looks Well	M	33	2019-04-21 20:33:17	2019-04-21	GENERAL PRACTICE	AMOXYCILLIN	Open wound of unspecified body region		Open wound of unspecified body region	Inappropriate	unnecessary	40	Barka PolyClinic
41.7	F	38.7	no	cut wound at the dorsum of the Rt hand	cut wound at the dorsum of the Rt hand . it takes 3 stitches with 4-0 stitch . patient also C/O SOB started 2 days ago suddenly not related to the physical activity , not associated with chest pain or cough or heart burning or other stymptoms , no orthopnea patient is not known as asthmatic , not diagnosed with any edical condition , not on any medications even OCP .	? General Examination:- =>BP :- 90/60 mmHg ; Temp :- 37?C ; ; General Condition :- Fair ? Respiratory Examination:- =>Breath Sounds :- Vesicular;Rhonchi :- No;Crepitation :- No; ? Abdomen Examination:- =>Soft :- Yes;	M	34	2019-04-22 20:42:48	2019-04-22	GENERAL PRACTICE	CLOXACILLIN	Open wound of upper limb, level unspecified		Open wound of unspecified body region	Inappropriate	unnecessary	33	Barka PolyClinic
7.3	F	4.3	no	swelling	pt came complain of swelling in the left middle finger for 1week asso with itching	? General Examination:- =>Temp :- 36.5?C ; ; General Condition :- Fair ; Jaundice :- No ; Pallor :- No ; Throat :- Clear ? Respiratory Examination:- =>Breath Sounds :- Vesicular;Rhonchi :- No;Crepitation :- No;	M	35	2019-04-23 20:57:10	2019-04-23	GENERAL PRACTICE	AMOXYCILLIN	Cutaneous abscess, furuncle and carbuncle of limb		Cutaneous abscess, furuncle and carbuncle, unspecified	Appropriate	Appropriate	26	Barka PolyClinic
29.6	M	26.6	no	lump in rt lumber area since one and half months.. denying for truama or fall or any other injuiry fever with flu and sore throat	on exam localised swelling at rt lumber area tender ,mobile		F	48	2019-04-24 23:43:47	2019-04-24	GENERAL PRACTICE	CEPHALEXIN	Acute pharyngitis, unspecified	Localized swelling, mass and lump, unspecified	Cutaneous abscess, furuncle and carbuncle, unspecified	Appropriate	Appropriate	34	Barka PolyClinic
8.9	M	5.9	no	cold and throat pain, fever for 1 day		? General Examination:- =>Temp :- 37?C ; ; Weight :- 17.7Kg ; ; General Condition :- Looks Well ; Jaundice :- No ; Pallor :- No ; Throat :- Tonsillitis ? Respiratory Examination:- =>clear	M	33	2019-04-26 06:43:05	2019-04-26	GENERAL PRACTICE	AMOXYCILLIN	Acute tonsillitis, unspecified		Acute tonsillitis, unspecified	Inappropriate	unnecessary	34	Barka PolyClinic
34	M	31	neg	Diarrhea with abdominal pain	Diarrhea about 5 times with abdominal pain . no vomiting , asscoaited with mild abdominal pain . O/E there is mild tenderness over left lumbar region	? General Examination:- =>Temp :- 37?C ; ; General Condition :- Fair ? Respiratory Examination:- =>Breath Sounds :- Vesicular;Rhonchi :- No;Crepitation :- No; ? Abdomen Examination:- =>Soft :- Yes; no rigidity , no rebound tenderness	M	46	2019-04-26 22:59:14	2019-04-26	GENERAL PRACTICE	CEPHALEXIN	Diarrhoea and gastroenteritis of presumed infectious origin		Gastroenteritis of presumed infectious origin	Inappropriate	unnecessary	41	Barka PolyClinic
6.5	F	3.5	no	fever cough flu sore throat abd pain normal bh earache o/e wax ++		? General Examination:- =>General Condition :- Fair ; Throat :- Tonsillitis ? Respiratory Examination:- =>clear ? CVS Examination:- =>nad	F	36	2019-04-27 19:47:03	2019-04-27	GENERAL PRACTICE	CEPHALEXIN	Acute tonsillitis, unspecified		Acute tonsillitis, unspecified	Inappropriate	unnecessary	43	Barka PolyClinic
34.6	M	31.6	no	Rt nostril tenderness, swelling and redness	C/o Rt nostril tenderness, swelling and redness since yesterday. No discharges. No fever. No other complaints.	? General Examination:- =>BP :- 130/70 mmHg ; Temp :- 37?C ; ; General Condition :- Fair ; Pallor :- No ; Cyanosis :- No ? Respiratory Examination:- =>Breath Sounds :- Vesicular;Rhonchi :- No;Crepitation :- No;	M	53	2019-04-28 22:40:22	2019-04-28	GENERAL PRACTICE	CLOXACILLIN	Cellulitis, unspecified		Cellulitis, unspecified	Appropriate	Appropriate	38	Barka PolyClinic
19.7	M	16.7	no	no PMH hx of cellilitis around the rt 5th finger since 1 day redness , no discharge no hx of truma		? General Examination:- =>General Condition :- Fair ; Pallor :- No ; Cyanosis :- No ; Dehydration :- No redness of the 5th finger , no discharge	F	30	2019-04-30 07:38:45	2019-04-30	GENERAL PRACTICE	CLOXACILLIN	Cellulitis of finger and toe		Cellulitis, unspecified	Appropriate	Appropriate	31	Barka PolyClinic
9.4	M	6.4	no	fever sore throat cold f;lu		? General Examination:- =>Temp :- 37.2?C ; ; General Condition :- Fair ; Throat :- Tonsillitis ? Respiratory Examination:- =>clear ? CVS Examination:- =>nad	F	36	2019-05-01 17:18:31	2019-05-01	GENERAL PRACTICE	CEPHALEXIN	Acute tonsillitis, unspecified		Acute tonsillitis, unspecified	Inappropriate	unnecessary	37	Barka PolyClinic
48.9	M	45.9	no	fever flu sore throat c/o headache not known to have dm or htn ======= on d/c bp 140/70		? General Examination:- =>General Condition :- Fair ; Throat :- Congested temp 36.7 bp 175/110 ? Respiratory Examination:- =>clear ? CVS Examination:- =>nad	F	36	2019-05-02 18:16:41	2019-05-02	GENERAL PRACTICE	CEPHALEXIN	Acute nasopharyngitis [common cold]	Acute pharyngitis, unspecified	Acute pharyngitis, unspecified	Inappropriate	unnecessary	20	Barka PolyClinic
20.7	M	17.7	no	fall at play hit head and left knee abrsion + dizziness hd vomitied once 1 hour ago		abrasion knee . not weight bering bp 120 80 pulse 77 spo2 100 %	M	60	2019-05-03 19:18:47	2019-05-03	GENERAL PRACTICE	CLOXACILLIN	Pain in joint	Open wound of unspecified body region	Open wound of unspecified body region	Inappropriate	unnecessary	60	Barka PolyClinic
11.1	F	8.1	no	7 yr old girl, no PMHX h/o fever rt check swelling tooth decay			F	28	2019-05-04 18:01:22	2019-05-04	GENERAL PRACTICE	AMOXYCILLIN	Dental caries, unspecified		Gingivitis	Inappropriate	unnecessary	52	Barka PolyClinic
13	M	10	no	sore throat	pt came complain of sore throat asso with fever and vomit once	? General Examination:- =>Temp :- 38.5?C ; ; General Condition :- Fair ; Jaundice :- No ; Pallor :- No ; Throat :- Congested ? Respiratory Examination:- =>Breath Sounds :- Vesicular;Rhonchi :- No;Crepitation :- No;	M	35	2019-05-05 22:53:17	2019-05-05	GENERAL PRACTICE	AMOXYCILLIN	Streptococcal tonsillitis		Acute tonsillitis, unspecified	Appropriate	Appropriate	23	Barka PolyClinic
5.1	F	2.1	no	acute tonsillitis	fever since 2 days also h/o diarrhoea and vomiting since today . no cough or flu like symptom known congenital blindness on arrival temp was 39.4 C already received syp ibuprofen now temp is 38 C	? General Examination:- =>Temp :- 38?C ; ; General Condition :- Looks Well ; Jaundice :- No ; Pallor :- No ; Dehydration :- No ; Throat :- Tonsillitis ? Respiratory Examination:- =>clear ? Abdomen Examination:- =>soft	M	52	2019-05-06 23:25:00	2019-05-06	GENERAL PRACTICE	CEPHALEXIN	Acute tonsillitis, unspecified		Acute tonsillitis, unspecified	Inappropriate	unnecessary	36	Barka PolyClinic
4.9	M	1.9	no	fever	pt came complain of fever for 2days	? General Examination:- =>Temp :- 38.5?C ; ; General Condition :- Fair ; Jaundice :- No ; Pallor :- No ; Throat :- Tonsillitis ? Respiratory Examination:- =>Breath Sounds :- Vesicular;Rhonchi :- No;Crepitation :- No;	M	35	2019-05-08 02:12:14	2019-05-08	GENERAL PRACTICE	AMOXYCILLIN	Acute tonsillitis, unspecified		Acute tonsillitis, unspecified	Inappropriate	unnecessary	30	Barka PolyClinic
38.3	F	35.3	no	34 yr old female, h/o chronic sinusitis presented with h/o sore throat sputum no fever		? General Examination:- =>BP :- 120/80 mmHg ; General Condition :- Looks Well ; Throat :- Congested ? Respiratory Examination:- =>clear	F	28	2019-05-09 12:45:40	2019-05-09	GENERAL PRACTICE	CEPHALEXIN	Acute sinusitis, unspecified		Acute sinusitis	Appropriate	Appropriate	33	Barka PolyClinic
10.2	F	7.2	no	hx of sor throt ,fever lower abdominal pain since 2 day no vomittng, normal bwl habite no cough , no c.cold		? General Examination:- =>General Condition :- Fair ; Pallor :- No ; Cyanosis :- No ; Dehydration :- No ; Throat :- Congested temp37 ? Abdomen Examination:- =>soft , very mild generlized andominal tenderness ? CNS Examination:- =>intact	F	30	2019-05-10 12:33:55	2019-05-10	GENERAL PRACTICE	AMOXYCILLIN	Other and unspecified abdominal pain	Acute Pharyngitis	Acute pharyngitis, unspecified	Inappropriate	unnecessary	26	Barka PolyClinic
75.4	M	72.4	no	trauma with injury lt big toe	trauma with injury lt big toe 2 days back no other complain no h/o any major illness before	? General Examination:- =>Temp :- 36.7?C ; ; General Condition :- Fair ; Jaundice :- No ; Pallor :- No ; Clubbing :- No ; Cyanosis :- No ; Edema Feet :- No ; Dehydration :- No ? Respiratory Examination:- =>clear	M	46	2019-05-11 16:54:33	2019-05-11	GENERAL PRACTICE	CEPHALEXIN	Injury, unspecified		Open wound of unspecified body region	Inappropriate	unnecessary	38	Barka PolyClinic
13.5	M	10.5	no	cough	pt came complain of cough asso with headache for 1day and bdominal pain	? General Examination:- =>BP :- 114/65 mmHg ; Temp :- 36?C ; ; SPO2 :- 94 ; RBS :- 9.2 ; Pulse :- 116bts/min ; General Condition :- Fair ; Jaundice :- No ; Pallor :- No ; Throat :- Clear ? Respiratory Examination:- =>Breath Sounds :- Bronchial;Rhonchi :- No;Crepitation :- No;(wheeze chest) ? Abdomen Examination:- =>Soft :- Yes;Site of Tenderness :- Umbilicus;	M	35	2019-05-12 16:28:20	2019-05-12	GENERAL PRACTICE	AMOXYCILLIN	Acute upper respiratory infection, unspecified		Acute pharyngitis, unspecified	Inappropriate	unnecessary	19	Barka PolyClinic
22.3	M	19.3	no	superficial wound at the left lower leg with H/O sac filled with water inside	superficial wound at the left lower leg with H/O sac filled with water appeared spontanously 2 weeks ago then he open it by himself at home	? General Examination:- =>Temp :- 37?C ; ; General Condition :- Fair ? Respiratory Examination:- =>Breath Sounds :- Vesicular;Rhonchi :- No;Crepitation :- No;	M	34	2019-05-13 11:11:09	2019-05-13	GENERAL PRACTICE	CEPHALEXIN	Superficial injury of lower leg, unspecified	Infected wound	Infected wound	Appropriate	Appropriate	19	Barka PolyClinic
5.8	F	2.8	no	cough, colds	H/o cough and colds since 3 days ago. No fever. Also with some breathing abnormalities. No other complaints.	? General Examination:- =>Temp :- 36?C ; ; Pallor :- No ; Cyanosis :- No ; Throat :- Congested ? Respiratory Examination:- =>harsh BS ? Abdomen Examination:- =>soft	M	53	2019-05-14 15:27:22	2019-05-14	GENERAL PRACTICE	AMOXYCILLIN	Acute pharyngitis, unspecified		Acute pharyngitis, unspecified	Inappropriate	unnecessary	27	Barka PolyClinic
11.3	F	8.3	no	sore throat flu and fever since one day		? General Examination:- =>Weight :- 19.8Kg ; ; Throat :- Congested ? Respiratory Examination:- =>clear	F	48	2019-05-15 17:25:19	2019-05-15	GENERAL PRACTICE	AMOXYCILLIN	Acute tonsillitis, unspecified		Acute tonsillitis, unspecified	Inappropriate	unnecessary	37	Barka PolyClinic
7.8	M	4.8	no		cut wound at the forehead ,, fel at home , no bleeding no loc or vomiting	deep 1 1/2 cm long	F	36	2019-05-16 17:27:31	2019-05-16	GENERAL PRACTICE	AMOXYCILLIN	Pain, unspecified		Open wound of unspecified body region	Inappropriate	unnecessary	29	Barka PolyClinic
33	M	30	no	fever sore throat bodyache		? General Examination:- =>General Condition :- Fair ; Throat :- Tonsillitis temp 39 bp 90/60 ? Respiratory Examination:- =>Breath Sounds :- Vesicular;Rhonchi :- No;Crepitation :- No; ? CVS Examination:- =>nad	F	36	2019-05-17 15:54:19	2019-05-17	GENERAL PRACTICE	AMOXYCILLIN	Acute tonsillitis, unspecified		Acute tonsillitis, unspecified	Inappropriate	unnecessary	35	Barka PolyClinic
39.6	F	36.6	no	tonsilitis		? General Examination:- =>Temp :- 38?C ; ; Throat :- Tonsillitis ? Respiratory Examination:- =>clea	M	60	2019-05-18 15:11:34	2019-05-18	GENERAL PRACTICE	CEPHALEXIN	Acute tonsillitis, unspecified		Acute tonsillitis, unspecified	Inappropriate	unnecessary	44	Barka PolyClinic
7.1	F	4.1	no	sore throat	pt came complain of sore throat asso with voimting and fever for 2days	? General Examination:- =>Temp :- 37.6?C ; ; General Condition :- Fair ; Jaundice :- No ; Pallor :- No ; Throat :- Congested ? Respiratory Examination:- =>Breath Sounds :- Vesicular;Rhonchi :- No;Crepitation :- No;	M	35	2019-05-19 21:08:42	2019-05-19	GENERAL PRACTICE	AMOXYCILLIN	Acute pharyngitis, unspecified		Acute pharyngitis, unspecified	Inappropriate	unnecessary	17	Barka PolyClinic
7.2	F	4.2	no	fever cold		? General Examination:- =>General Condition :- Fair ; Throat :- Tonsillitis tmp 38.4 ? Respiratory Examination:- =>Breath Sounds :- Vesicular;Rhonchi :- No;Crepitation :- No; ? CVS Examination:- =>nad	F	36	2019-05-20 23:43:22	2019-05-20	GENERAL PRACTICE	AMOXYCILLIN	Acute tonsillitis, unspecified		Acute tonsillitis, unspecified	Inappropriate	unnecessary	22	Barka PolyClinic
6	F	3	no	fever, throat pain, cough, colds, oral lesions	H/o fever with throat pain since 2 days ago. Also with cough and colds since few days back. Noted oral lesions with salivation. No other complaints.	? General Examination:- =>Temp :- 38.1?C ; ; Weight :- 12.4Kg ; ; General Condition :- Fair ; Pallor :- No ; Cyanosis :- No ; Throat :- Congested ? Respiratory Examination:- =>harsh bS ? Abdomen Examination:- =>soft	M	53	2019-05-21 19:48:54	2019-05-21	GENERAL PRACTICE	AMOXYCILLIN	Acute pharyngitis, unspecified		Acute pharyngitis, unspecified	Inappropriate	unnecessary	34	Barka PolyClinic
85.8	F	82.8	high wbc in urine	for labs review		? General Examination:- =>General Condition :- Looks Well	M	33	2019-05-22 23:15:30	2019-05-22	GENERAL PRACTICE	CEFUROXIME	Other specified medical care	Urinary Tract Infection	Urinary Tract Infection	Inappropriate	escalated use of extended-spectrum antibiotics	17	Barka PolyClinic
8.7	M	5.7	no	swelling	py came complain of swelling in the right mandible fo 1day	? General Examination:- =>General Condition :- Fair ; Jaundice :- No ; Pallor :- No ; Throat :- Clear ? Respiratory Examination:- =>Breath Sounds :- Vesicular;Rhonchi :- No;Crepitation :- No;	M	35	2019-05-24 13:18:14	2019-05-24	GENERAL PRACTICE	AMOXYCILLIN	Acute gingivitis		Gingivitis	Inappropriate	unnecessary	34	Barka PolyClinic
11.2	M	8.2	no	sore throat with flu and fever since three days		? General Examination:- =>Temp :- 36.6?C ; ; General Condition :- Fair ; Jaundice :- No ; Pallor :- No ; Clubbing :- No ; Cyanosis :- No ; Edema Feet :- No ; Throat :- Congested ? Respiratory Examination:- =>clear	F	48	2019-05-25 21:03:10	2019-05-25	GENERAL PRACTICE	AMOXYCILLIN	Acute pharyngitis, unspecified		Acute pharyngitis, unspecified	Inappropriate	unnecessary	33	Barka PolyClinic
34.8	F	31.8	no	pain in the tooth. extracted yesterday. on no antibiotics, no analgesia? known case of dm.			M	49	2019-05-27 00:59:45	2019-05-27	GENERAL PRACTICE	AMOXYCILLIN	Dental caries, unspecified		Gingivitis	Appropriate	Appropriate	4	Barka PolyClinic
50	F	47	no	c.cold	46 yr old female, HLP presented with runny nose cough with sputum no fever eye itchiness	? General Examination:- =>BP :- 140/80 mmHg ; Temp :- 36?C ; ; General Condition :- Looks Well ; Throat :- Congested ? Respiratory Examination:- =>clear	F	28	2019-05-28 04:03:58	2019-05-28	GENERAL PRACTICE	CEPHALEXIN	Acute nasopharyngitis [common cold]		Acute pharyngitis, unspecified	Inappropriate	unnecessary	22	Barka PolyClinic
43.1	F	40.1	no	cut wound	no PMHx cut wound in the rt thigh anteriorly with glass	7 cm	F	28	2019-05-29 18:38:40	2019-05-29	GENERAL PRACTICE	AMOXYCILLIN	Open wound of unspecified body region		Open wound of unspecified body region	Inappropriate	unnecessary	27	Barka PolyClinic
32.6	F	29.6	pos wbc in stool		has g. fatigability ,, nausea and vomiting ,, plus diarrhea, since 3 d ,, she vomits whatever she ingests ,, diarhea of 3 times today , mild fever	? General Examination:- =>General Condition :- Fair ; Dehydration :- No ? Respiratory Examination:- =>Respiratory_distress :- No;Crepitation :- No; ? Abdomen Examination:- =>Soft :- Yes;	F	36	2019-05-31 00:43:16	2019-05-31	GENERAL PRACTICE	METRONIDAZOLE	Gastritis, unspecified		Gastroenteritis of presumed infectious origin	Inappropriate	incorrect spectrum of antibiotic	4	Barka PolyClinic
13.2	F	10.2	no	c/o vomiting 4 times normal bh no fever no ari		? General Examination:- =>Weight :- 22.8Kg ; ; General Condition :- Fair ; Throat :- Tonsillitis temp 34 ? Respiratory Examination:- =>clear ? CVS Examination:- =>nad	F	36	2019-06-01 09:58:18	2019-06-01	GENERAL PRACTICE	AMOXYCILLIN	Acute tonsillitis, unspecified		Acute tonsillitis, unspecified	Inappropriate	unnecessary	16	Barka PolyClinic
10.4	M	7.4	no	impetigo	infected skin lesion at forehead and left side of the cheek since today no h/o fever	? General Examination:- =>General Condition :- Looks Well ; Jaundice :- No ; Pallor :- No	M	52	2019-06-02 16:58:33	2019-06-02	GENERAL PRACTICE	CLOXACILLIN	Impetigo [any organism] [any site]		Cutaneous abscess, furuncle and carbuncle, unspecified	Appropriate	Appropriate	30	Barka PolyClinic
40	F	37	no	sore throat	36 yr old female, no PMHX presented with sore throat mouth lesion on/off fever	? General Examination:- =>Temp :- 36?C ; ; General Condition :- Looks Well ; Throat :- Tonsillitis ? Respiratory Examination:- =>clear	F	28	2019-06-03 20:55:53	2019-06-03	GENERAL PRACTICE	CEPHALEXIN	Acute tonsillitis, unspecified		Acute tonsillitis, unspecified	Inappropriate	unnecessary	26	Barka PolyClinic
7.3	M	4.3	no	ORAL INJURY. HX OF FALL AT HOME.			M	49	2019-06-05 09:33:00	2019-06-05	GENERAL PRACTICE	AMOXYCILLIN	Superficial injury of lip and oral cavity		Open wound of unspecified body region	Inappropriate	unnecessary	25	Barka PolyClinic
75.7	M	72.7	high wbc and neutrophil	fever since yesterday	fever since yesterday no cough no neck rigidity no vomiting constipation since 2 days no h/o any major illness before	? General Examination:- =>BP :- 145/82 mmHg ; Temp :- 39.7?C ; ; SPO2 :- 95 ; RBS :- 8.5 ; Pulse :- 93bts/min ; General Condition :- Fair ; Jaundice :- No ; Pallor :- No ; Clubbing :- No ; Cyanosis :- No ; Edema Feet :- No ; Dehydration :- No ? Respiratory Examination:- =>clear	M	46	2019-06-06 13:12:28	2019-06-06	GENERAL PRACTICE	AUGMENTIN	Fever, unspecified	Sepsis	Sepsis	Appropriate	Appropriate	32	Barka PolyClinic
4.4	M	1.4	no		has fevr/ 3 d , ass with occasional vomiting , , no other complain	throat : inflammed tonsils chest : nad	F	36	2019-06-07 20:47:42	2019-06-07	GENERAL PRACTICE	AMOXYCILLIN	Fever, unspecified	Acute nasopharyngitis [common cold]	Acute pharyngitis, unspecified	Inappropriate	unnecessary	48	Barka PolyClinic
29.3	M	26.3	no	fever	25 yr old male, no PMHX h/o fever sore throat boday ache	? General Examination:- =>BP :- 110/60 mmHg ; Temp :- 37.8?C ; ; General Condition :- Looks Well ; Throat :- Congested ? Respiratory Examination:- =>clear	F	28	2019-06-07 01:29:50	2019-06-07	GENERAL PRACTICE	CEPHALEXIN	Acute upper respiratory infection, unspecified		Acute pharyngitis, unspecified	Inappropriate	unnecessary	30	Barka PolyClinic
6.5	M	3.5	no	pain and swelling on the rt foot since few hours ,, relative not known the mode of injury no other complain mother thinking about spin		? General Examination:- =>General Condition :- Fair ; Jaundice :- No ; Pallor :- No	F	38	2019-06-09 00:16:24	2019-06-09	GENERAL PRACTICE	CLOXACILLIN	Pain in limb		Pain in limb	Inappropriate	unnecessary	18	Barka PolyClinic
45.6	F	42.6	no	abdominal pain since 5 days no vomiting having loose motion		? General Examination:- =>Temp :- 36.6?C ; ; General Condition :- Looks Well ; Jaundice :- No ; Pallor :- No ; Clubbing :- No ; Cyanosis :- No ; Edema Feet :- No ? Respiratory Examination:- =>clear	F	48	2019-06-10 07:57:26	2019-06-10	GENERAL PRACTICE	METRONIDAZOLE	Diarrhoea and gastroenteritis of presumed infectious origin		Gastroenteritis of presumed infectious origin	Inappropriate	unnecessary	37	Barka PolyClinic
31.9	M	28.9	high wbc in urine	lumbar pain with haematuria	the	? General Examination:- =>BP :- 120/70 mmHg ; Pulse :- 80bts/min ; Pallor :- No ; Cyanosis :- No ? Abdomen Examination:- =>soft	M	46	2019-06-11 13:05:52	2019-06-11	GENERAL PRACTICE	AMOXYCILLIN	Pain, unspecified	Urinary Tract Infection	Urinary Tract Infection	Appropriate	Appropriate	25	Barka PolyClinic
32	M	29	no	fever and sore throat for three days. impression: acute follicular tonsillitis.		? General Examination:- =>Temp :- 37.2?C ; ; Lymphadenopathy :- Yes ; Throat :- Tonsillitis ? Respiratory Examination:- =>nad	M	49	2019-06-13 15:01:45	2019-06-13	GENERAL PRACTICE	CEPHALEXIN	Acute tonsillitis, unspecified	Acute follicular tonsillitis	Acute tonsillitis, unspecified	Appropriate	Appropriate	27	Barka PolyClinic
31	F	28	no	no PMH hx of sor thor, c.cold since 2 day, fever no cough		? General Examination:- =>General Condition :- Fair ; Pallor :- No ; Cyanosis :- No ; Dehydration :- No ; Throat :- Congested temp 37.2 ? Respiratory Examination:- =>clear ? CNS Examination:- =>intact	F	30	2019-06-14 14:13:50	2019-06-14	GENERAL PRACTICE	CEPHALEXIN	Acute pharyngitis, unspecified		Acute pharyngitis, unspecified	Inappropriate	unnecessary	30	Barka PolyClinic
19.6	M	16.6	no	open wounds at lt ankle after fall from bicyckle today evening	open wounds at lt ankle after fall from bicyckle today evening also superficial injury rt knee no h/o any major illnes before	? General Examination:- =>Temp :- 36.4?C ; ; General Condition :- Fair ; Jaundice :- No ; Pallor :- No ; Clubbing :- No ; Cyanosis :- No ; Edema Feet :- No ; Dehydration :- No	M	46	2019-06-15 19:55:46	2019-06-15	GENERAL PRACTICE	CLOXACILLIN	Multiple open wounds of ankle and foot		Open wound of unspecified body region	Appropriate	Appropriate	41	Barka PolyClinic
36.6	F	33.6	high wbc in urine	frequency and pain while passing urine lower abdominal pain			F	48	2019-06-19 08:39:16	2019-06-19	GENERAL PRACTICE	CIPROFLOXACIN	Urinary tract infection, site not specified		Urinary Tract Infection	Inappropriate	escalated use of extended-spectrum antibiotics	28	Barka PolyClinic
10	F	7	no	burn with hot tea on lt lumber area..	on exam skin blister and skin peeled off.. redness arround		F	48	2019-06-20 22:23:44	2019-06-20	GENERAL PRACTICE	AMOXYCILLIN	Burns involving less than 10% of body surface		Burns involving less than 10% of body surface	Inappropriate	unnecessary	43	Barka PolyClinic
4.6	M	1.6	no	cold and flu w/ fever for 1 day		? General Examination:- =>Temp :- 37.8?C ; ; General Condition :- Looks Well ; Jaundice :- No ; Throat :- Congested ? Respiratory Examination:- =>clear	M	33	2019-06-22 01:28:33	2019-06-22	GENERAL PRACTICE	AMOXYCILLIN	Acute upper respiratory infection, unspecified		Acute pharyngitis, unspecified	Inappropriate	unnecessary	30	Barka PolyClinic
6.1	F	3.1	no	vomiting since today .. fever today taken to barka hc they given paracetamol and zeat but child not improved	no diarrhoea no abdominal pain	? General Examination:- =>Temp :- 38?C ; ; Weight :- 14.6Kg ; ; General Condition :- Looks Well ; Jaundice :- No ; Pallor :- No ; Clubbing :- No ; Cyanosis :- No ; Throat :- Clear ? Respiratory Examination:- =>clear	F	48	2019-06-23 01:35:05	2019-06-23	GENERAL PRACTICE	AMOXYCILLIN	Acute upper respiratory infection, unspecified		Acute pharyngitis, unspecified	Inappropriate	unnecessary	22	Barka PolyClinic
5.2	M	2.2	no	sore throat since 3days also habve ear pain fever on an d off		? General Examination:- =>General Condition :- Fair ; Jaundice :- No ; Pallor :- No ; Throat :- Congested	F	38	2019-06-24 17:17:21	2019-06-24	GENERAL PRACTICE	AMOXYCILLIN	Acute pharyngitis, unspecified		Acute pharyngitis, unspecified	Inappropriate	unnecessary	41	Barka PolyClinic
16.2	F	13.2	no	dermatitis	skin lesion and itching on rt forearm and back since three days . no fever . no othr lesiuon any other parts of body .. no fever	? General Examination:- =>BP :- 120/70 mmHg ; Pulse :- 80bts/min	M	46	2019-06-25 18:27:14	2019-06-25	GENERAL PRACTICE	CLOXACILLIN	Other specified dermatitis		Dermatitis	Inappropriate	unnecessary	22	Barka PolyClinic
25.1	F	22.1	no	sore thorat with with flu and fever since today		? General Examination:- =>Temp :- 38.8?C ; ; Jaundice :- No ; Pallor :- No ; Clubbing :- No ; Cyanosis :- No ; Throat :- Tonsillitis ? Respiratory Examination:- =>clear	F	48	2019-06-26 23:34:37	2019-06-26	GENERAL PRACTICE	CEPHALEXIN	Acute tonsillitis, unspecified		Acute tonsillitis, unspecified	Inappropriate	unnecessary	25	Barka PolyClinic
3.6	M	0.6	pos wbc in stool	diahrea	diahrea since yesterday ... no vomiting . no fever or abdominal apin	? General Examination:- =>Temp :- 36.8?C ; ; Pallor :- No ; Cyanosis :- No ; Dehydration :- No ; Throat :- Clear ? Respiratory Examination:- =>clear ? Abdomen Examination:- =>soft	M	46	2019-06-28 10:52:07	2019-06-28	GENERAL PRACTICE	CEPHALEXIN	Diarrhoea and gastroenteritis of presumed infectious origin		Gastroenteritis of presumed infectious origin	Inappropriate	incorrect spectrum of antibiotic	31	Barka PolyClinic
5.4	M	2.4	no	FU FOR XRAYS. XRAY NASAL BONE SHOWS NO BONY LESIONS.			M	49	2019-06-29 11:45:38	2019-06-29	GENERAL PRACTICE	AMOXYCILLIN	Epistaxis		Epistaxis	Inappropriate	unnecessary	25	Barka PolyClinic
43.8	F	40.8	no	C/O COUGH SORE THROAT WITH WHITE SPUTUM NO OTHER COMPLAIN NO H/O TRAVEL NO H/O TB CONTACT		? General Examination:- =>Temp :- 36.6?C ; ; General Condition :- Fair ; Throat :- Congested ? Respiratory Examination:- =>Chest Shape :- Normal; Respiratory_distress :- No;Chest movement :- Normal;Rhonchi :- No;Crepitation :- No; ? CVS Examination:- =>First Heart Sound:- Normal ; second Heart Sound:- Normal	F	53	2019-06-30 11:43:26	2019-06-30	GENERAL PRACTICE	ERYTHROMYCIN	Acute upper respiratory infection, unspecified	Acute pharyngitis	Acute pharyngitis, unspecified	Inappropriate	unnecessary	42	Barka PolyClinic
8.3	F	5.3	no	fever with sorethroat	fever started yesterday . O/E there is acute tonsiilitis	? General Examination:- =>Temp :- 37.8?C ; ; General Condition :- Fair ; Throat :- Tonsillitis ? Respiratory Examination:- =>Breath Sounds :- Vesicular;Rhonchi :- No;Crepitation :- No;	M	34	2019-07-01 19:00:13	2019-07-01	GENERAL PRACTICE	CEPHALEXIN	Acute tonsillitis, unspecified		Acute tonsillitis, unspecified	Inappropriate	unnecessary	35	Barka PolyClinic
24.8	F	21.8	no	LMP 2 weeks back ,, c/o vaginal discharge yellowish with odor ,, and itching + ,, also having dysuria no bowel complains		? General Examination:- =>General Condition :- Fair	F	41	2019-07-03 18:05:47	2019-07-03	GENERAL PRACTICE	METRONIDAZOLE	Candidiasis of vulva and vagina		Candidiasis of vulva and vagina	Inappropriate	unnecessary	35	Barka PolyClinic
4.2	M	1.2	no	cough since 5 days flu since 5 days fever off and on		? General Examination:- =>Temp :- 36.6?C ; ; Weight :- 10Kg ; ; General Condition :- Looks Well ; Jaundice :- No ; Pallor :- No ; Throat :- Congested ? Respiratory Examination:- =>harsh vesicular breathing	F	48	2019-07-05 10:58:29	2019-07-05	GENERAL PRACTICE	AMOXYCILLIN	Acute upper respiratory infection, unspecified		Acute pharyngitis, unspecified	Inappropriate	unnecessary	25	Barka PolyClinic
41.1	M	38.1	no	acute tonsillitis	fever .. sore throat and bodyache since yesterady .. no vomiting	? General Examination:- =>BP :- 120/80 mmHg ; Temp :- 37.5?C ; ; Clubbing :- No ; Throat :- Tonsillitis	M	46	2019-07-06 17:04:05	2019-07-06	GENERAL PRACTICE	CEPHALEXIN	Acute tonsillitis, unspecified		Acute tonsillitis, unspecified	Inappropriate	unnecessary	30	Barka PolyClinic
4.1	F	1.1	no	child w/ cold and flu for 1 dau fever? active good hydration chest clear		? General Examination:- =>Temp :- 36.3?C ; ; Weight :- 7.3Kg ; ; Jaundice :- No ; Pallor :- No ; Clubbing :- No ? Respiratory Examination:- =>clear	M	33	2019-07-07 14:33:55	2019-07-07	GENERAL PRACTICE	AMOXYCILLIN	Acute nasopharyngitis [common cold]		Acute pharyngitis, unspecified	Inappropriate	unnecessary	33	Barka PolyClinic
59.8	F	56.8	no	c/o fronteal headache with vision not clear and tonsillitis		? General Examination:- =>BP :- 155/76 mmHg ; Temp :- 36?C ; ; General Condition :- Fair ; Dehydration :- No ; Throat :- Tonsillitis ? Respiratory Examination:- =>clear ? CVS Examination:- =>First Heart Sound:- Normal ; second Heart Sound:- Normal	F	53	2019-07-09 12:49:17	2019-07-09	GENERAL PRACTICE	CEPHALEXIN	Acute tonsillitis, unspecified		Acute tonsillitis, unspecified	Inappropriate	unnecessary	36	Barka PolyClinic
29.5	F	26.5	no	urti	fever ,cough ,headache and bodyache since yesterday	? General Examination:- =>Temp :- 38?C ; ; General Condition :- Fair ; Jaundice :- No ; Pallor :- No ; Throat :- Congested ? Respiratory Examination:- =>clear ? Abdomen Examination:- =>soft	M	52	2019-07-10 20:50:56	2019-07-10	GENERAL PRACTICE	CEPHALEXIN	Acute upper respiratory infection, unspecified		Acute pharyngitis, unspecified	Inappropriate	unnecessary	53	Barka PolyClinic
6.5	M	3.5	no		small papular rash all over his body , itchy , ass with fever sincxe yesterday	throat : infected tonsils t. 37 chest : nad	F	36	2019-07-12 12:24:53	2019-07-12	GENERAL PRACTICE	AMOXYCILLIN	Rash and other nonspecific skin eruption	acute bacterial tonsillitis	Acute tonsillitis, unspecified	Appropriate	Appropriate	33	Barka PolyClinic
28.1	M	25.1	EH	c/o loose motions since this morning ,, h/oi eating from outside yesterday no fever ,, no vomiting no other complain		? General Examination:- =>General Condition :- Fair ; Jaundice :- No ; Pallor :- No	F	41	2019-07-13 17:35:01	2019-07-13	GENERAL PRACTICE	METRONIDAZOLE	Diarrhoea and gastroenteritis of presumed infectious origin		Gastroenteritis of presumed infectious origin	Appropriate	Appropriate	31	Barka PolyClinic
84.8	M	81.8	no	fever	pt came complain of fever for 1day no cough or comon cold	? General Examination:- =>BP :- 170/70 mmHg ; Temp :- 38.1?C ; ; RBS :- 10 ; General Condition :- Fair ; Jaundice :- No ; Pallor :- No ? Respiratory Examination:- =>Breath Sounds :- Vesicular;Rhonchi :- No;Crepitation :- No; ? Abdomen Examination:- =>Soft :- Yes;	M	35	2019-07-14 20:17:59	2019-07-14	GENERAL PRACTICE	AMOXYCILLIN	Other and unspecified symptoms and signs involving the urinary system		Urinary Tract Infection	Inappropriate	unnecessary	31	Barka PolyClinic
7.5	M	4.5	no	acute tonsillitis	fever. sore throat and c.cold since two days .. no vomiting . no resp .. Distress	? General Examination:- =>Temp :- 37?C ; ; Pallor :- No ; Cyanosis :- No ; Throat :- Tonsillitis ? Respiratory Examination:- =>clear	M	46	2019-07-16 17:10:21	2019-07-16	GENERAL PRACTICE	CEPHALEXIN	Acute tonsillitis, unspecified		Acute tonsillitis, unspecified	Inappropriate	unnecessary	31	Barka PolyClinic
7.6	F	4.6	no		sore throat and fever / 2 d ,	looks fair , afebrile throat : inflammed tonsils	F	36	2019-07-18 17:53:14	2019-07-18	GENERAL PRACTICE	AMOXYCILLIN	Acute tonsillitis, unspecified		Acute tonsillitis, unspecified	Inappropriate	unnecessary	26	Barka PolyClinic
82.8	M	79.8	EH	bleeding per anus	Pt brougth due to bleeding per anus? since about 3 days ago. Pt claims he passed out blood stained stool once daily. No anal pain. No vomiting. No fever. No other complaints. Last month came due to same complaints.	? General Examination:- =>BP :- 140/85 mmHg ; Temp :- 36?C ; ; SPO2 :- 99 ; Pulse :- 81bts/min ; General Condition :- Fair ; Pallor :- No ; Cyanosis :- No ? Respiratory Examination:- =>Breath Sounds :- Vesicular;Rhonchi :- No;Crepitation :- No; ? Abdomen Examination:- =>soft	M	53	2019-07-19 20:51:05	2019-07-19	GENERAL PRACTICE	METRONIDAZOLE	Diarrhoea and gastroenteritis of presumed infectious origin		Gastroenteritis of presumed infectious origin	Appropriate	Appropriate	37	Barka PolyClinic
9.5	F	6.5	no	dental abcess since three days	on exam dental caries and abcess..swelling of cheek rt side	? General Examination:- =>Weight :- 14.5Kg ; ; General Condition :- Looks Well ; Jaundice :- No ; Pallor :- No ; Clubbing :- No ; Cyanosis :- No ? Respiratory Examination:- =>clear	F	48	2019-07-20 23:31:47	2019-07-20	GENERAL PRACTICE	AMOXYCILLIN	Periapical abscess without sinus		Cutaneous abscess, furuncle and carbuncle, unspecified	Appropriate	Appropriate	37	Barka PolyClinic
5.2	M	2.2	no	Fall.	A 1-Year old boy, brought with history of fall in swiming pool , trauma on scalp. Abrasion on rt.side occipital, with Oozing of blood. No loc, no vomiting, no drowssy.	? General Examination:- =>General Condition :- Looks Well ? CNS Examination:- =>Intact.	M	41	2019-07-22 18:54:27	2019-07-22	GENERAL PRACTICE	CLOXACILLIN	Pain, unspecified	Open wound of unspecified body region	Open wound of unspecified body region	Inappropriate	unnecessary	14	Barka PolyClinic
85.6	M	82.6	no	LEFT GREAT TOENAIL PAIN+OFFENSIVE DISCHARGE FOR TWO WEEKS. AFEBRILE. KNOWN CASE OF DM, HTN AND HPL.		? General Examination:- =>BP :- 122/70 mmHg ; Temp :- 36.3?C ; ; RBS :- 8.1	M	49	2019-07-24 07:28:56	2019-07-24	GENERAL PRACTICE	CLOXACILLIN	Cellulitis of finger and toe		Cellulitis, unspecified	Appropriate	Appropriate	24	Barka PolyClinic
24.2	F	21.2	no	history of trauma	pt came complain of cut wound in the left foot after trauma	? General Examination:- =>General Condition :- Fair ; Jaundice :- No ; Pallor :- No ; Throat :- Clear	M	35	2019-07-26 02:26:44	2019-07-26	GENERAL PRACTICE	CLOXACILLIN	Injury, unspecified		Open wound of unspecified body region	Inappropriate	unnecessary	21	Barka PolyClinic
33.1	M	30.1	no	Cut wound with cutter on tip of lt.4th finger.		? General Examination:- =>General Condition :- Looks Well	M	41	2019-07-27 13:45:12	2019-07-27	GENERAL PRACTICE	CLOXACILLIN	Injury, unspecified	Open wound of unspecified body region	Open wound of unspecified body region	Inappropriate	unnecessary	41	Barka PolyClinic
39.5	F	36.5	no	no PMH , hx of under arm lumb since 4 day she started to have it after she shave her under arm redness , swelling , no discharge tenderness , no fever		? General Examination:- =>General Condition :- Fair ; Pallor :- No ; Cyanosis :- No ; Dehydration :- No around 3*2 cm swelling ?rednerness , no discharge ? CNS Examination:- =>intact	F	30	2019-07-29 18:05:43	2019-07-29	GENERAL PRACTICE	CLOXACILLIN	Cellulitis, unspecified		Cellulitis, unspecified	Inappropriate	unnecessary	37	Barka PolyClinic
3.4	M	1	no	cough . c.cold	cough . c.cold since three days .. assocaited with fever .. no resp .. distress ... feeding well	? General Examination:- =>Temp :- 36.5?C ; ; Pallor :- No ; Cyanosis :- No ; Throat :- Clear ? Respiratory Examination:- =>clear	M	46	2019-07-31 21:07:53	2019-07-31	GENERAL PRACTICE	AMOXYCILLIN	Acute upper respiratory infection, unspecified		Acute pharyngitis, unspecified	Inappropriate	unnecessary	29	Barka PolyClinic
37.1	M	34.1	no	pain in penis swelling fever two day mild itch		cellulitis around glans tenderness in inguinal nodes both sides	M	60	2019-08-02 19:04:46	2019-08-02	GENERAL PRACTICE	CLOXACILLIN	Other inflammatory disorders of penis	Cellulitis, unspecified	Cellulitis, unspecified	Appropriate	Appropriate	39	Barka PolyClinic
39.6	M	36.6	pos wbc in stool	FEVER AND MYALGIA FOR ONE DAY. ASSOC WITH COLICKY ABDOMINAL PAIN WITH DIARRHOEA. NO BLOOD OR MUCUS IN THE STOOLS.		? General Examination:- =>BP :- 108/70 mmHg ; Temp :- 36.1?C ; ; Dehydration :- No ? Respiratory Examination:- =>NAD ? Abdomen Examination:- =>SOFT	M	49	2019-08-04 04:40:39	2019-08-04	GENERAL PRACTICE	METRONIDAZOLE	Fever, unspecified	Gastroentritis	Gastroenteritis of presumed infectious origin	Inappropriate	incorrect spectrum of antibiotic	21	Barka PolyClinic
26.8	M	23.8	no	abdominal colic and diahrea	abdominal colic and diahrea since two days ., no vomiting . no fever	? General Examination:- =>BP :- 100/70 mmHg ; Pulse :- 80bts/min ? Abdomen Examination:- =>soft	M	46	2019-08-06 04:24:33	2019-08-06	GENERAL PRACTICE	METRONIDAZOLE	Diarrhoea and gastroenteritis of presumed infectious origin		Gastroenteritis of presumed infectious origin	Inappropriate	unnecessary	18	Barka PolyClinic
24.6	M	21.6	neg	diarrhoea	pt came complain of diarrhoea ass. with abdominal pain for 3days no fever	? General Examination:- =>General Condition :- Fair ; Jaundice :- No ; Pallor :- No ; Throat :- Clear ? Respiratory Examination:- =>Breath Sounds :- Vesicular;Rhonchi :- No;Crepitation :- No; ? Abdomen Examination:- =>Soft :- Yes;	M	35	2019-08-08 10:45:32	2019-08-08	GENERAL PRACTICE	METRONIDAZOLE	Diarrhoea and gastroenteritis of presumed infectious origin		Gastroenteritis of presumed infectious origin	Inappropriate	unnecessary	35	Barka PolyClinic
11.9	F	8.9	no	headache	H/o headache today. No cough nor colds. No other complaints.	? General Examination:- =>Temp :- 36?C ; ; General Condition :- Fair ; Pallor :- No ; Cyanosis :- No ? Respiratory Examination:- =>Breath Sounds :- Vesicular;Rhonchi :- No;Crepitation :- No; ? Abdomen Examination:- =>soft	M	53	2019-08-09 20:32:57	2019-08-09	GENERAL PRACTICE	AMOXYCILLIN	Acute pharyngitis, unspecified		Acute pharyngitis, unspecified	Inappropriate	unnecessary	39	Barka PolyClinic
10.9	F	7.9	no	otalgia in Rt ear with fever and sorethroat with c.cold	otalgia in Rt ear with fever and sorethroat with c.cold not responding for kefelex antibiotics . she was on antibiotic for 4 days but still she is febrile. O/E there is congested red ear drum with no ability to recognize ambu or handle of malleulos which recommend AOM . referred before to ENT but still didn't get appointment	? General Examination:- =>Temp :- 38.8?C ; ; General Condition :- Fair ; Throat :- Congested ? Respiratory Examination:- =>Breath Sounds :- Vesicular;Rhonchi :- No;Crepitation :- No;	M	34	2019-08-11 11:21:02	2019-08-11	GENERAL PRACTICE	CEFUROXIME	Otitis media, unspecified	Acute pharyngitis, unspecified	Acute pharyngitis, unspecified	Inappropriate	unnecessary	28	Barka PolyClinic
4.3	M	1.3	no	fever .. c.cold and lesion inside mouth	fever .. c.cold and lesion inside mouth since two days . no vomiting . no resp .. distress ... feeding well	? General Examination:- =>Temp :- 37.5?C ; ; Pallor :- No ; Cyanosis :- No ; Dehydration :- No ; Throat :- Congested ? Respiratory Examination:- =>clear	M	46	2019-08-12 18:01:24	2019-08-12	GENERAL PRACTICE	AMOXYCILLIN	Acute upper respiratory infection, unspecified		Acute pharyngitis, unspecified	Inappropriate	unnecessary	59	Barka PolyClinic
4.8	F	1.8	neg	fever	fever with started today . she is feeding well . normal bowel habit . no apperant focus of infection . no cough or c.cold or diarrhea or vomiting .	? General Examination:- =>Temp :- 38.5?C ; ; General Condition :- Fair ? Respiratory Examination:- =>Breath Sounds :- Vesicular;Rhonchi :- No;Crepitation :- No;	M	34	2019-08-13 20:06:31	2019-08-13	GENERAL PRACTICE	AMOXYCILLIN	Fever, unspecified	Diarrhoea and gastroenteritis of presumed infectious origin	Gastroenteritis of presumed infectious origin	Inappropriate	unnecessary	37	Barka PolyClinic
4.6	F	1.6	no	sore throat with c.cold		? General Examination:- =>Temp :- 36.3?C ; ; Weight :- 9.7Kg ; ; General Condition :- Fair ; Pallor :- No ; Cyanosis :- No ; Dehydration :- No ; Throat :- Congested ? Respiratory Examination:- =>clear ? CVS Examination:- =>nad	M	47	2019-08-15 01:10:21	2019-08-15	GENERAL PRACTICE	CEPHALEXIN	Acute pharyngitis, unspecified		Acute pharyngitis, unspecified	Inappropriate	unnecessary	17	Barka PolyClinic
35.6	M	32.6	no	Fever, throat pain.	A 32-Year, old gentleman, presents with history of fever and throat pain.... 1 day.	? General Examination:- =>Temp :- 39?C ; ; General Condition :- Fair ; Throat :- Tonsillitis	M	33	2019-08-16 07:43:17	2019-08-16	GENERAL PRACTICE	ERYTHROMYCIN	Acute tonsillitis, unspecified		Acute tonsillitis, unspecified	Inappropriate	unnecessary	31	Barka PolyClinic
6.8	M	3.8	no	hx of tooth pain on and off		? General Examination:- =>General Condition :- Fair ; Pallor :- No ; Cyanosis :- No ; Dehydration :- No ? CNS Examination:- =>intact	F	30	2019-08-17 16:17:58	2019-08-17	GENERAL PRACTICE	AMOXYCILLIN	Pain, unspecified	Gingivitis	Gingivitis	Inappropriate	unnecessary	40	Barka PolyClinic
16.9	M	13.9	no	SORE THROAT FOR ONE DAY. NO COUGH OR COLD. FEVER?		? General Examination:- =>Temp :- 36.5?C ; ; Weight :- 31.6Kg ; ; General Condition :- Fair ; Throat :- Congested ? Respiratory Examination:- =>NAD	M	49	2019-08-18 22:30:06	2019-08-18	GENERAL PRACTICE	CEPHALEXIN	Pain in throat	Acute pharyngitis, unspecified	Acute pharyngitis, unspecified	Inappropriate	unnecessary	38	Barka PolyClinic
44.9	M	41.9	no	anal irritation / tinea in limbs / for UFR for uric crystal past renal calculi +			M	60	2019-08-20 11:26:55	2019-08-20	GENERAL PRACTICE	CEPHALEXIN	Tinea corporis		Tinea corporis	Inappropriate	unnecessary	35	Barka PolyClinic
70.8	F	67.8	no	fever, cough, colds throat pain	C/o fever with cough and colds since 5 days ago. Also with throat pain. No other complaints. Pt denies any h/o chronic illness in the past.	? General Examination:- =>BP :- 120/60 mmHg ; Temp :- 36.5?C ; ; General Condition :- Fair ; Pallor :- No ; Cyanosis :- No ; Throat :- Congested ? Respiratory Examination:- =>rhonchi BLF	M	53	2019-08-21 22:39:03	2019-08-21	GENERAL PRACTICE	CEPHALEXIN	Acute pharyngitis, unspecified		Acute pharyngitis, unspecified	Inappropriate	unnecessary	32	Barka PolyClinic
7.8	F	4.8	no		flu , cough , fevre , sore throat	febrile 39 chest : harsh breathing sound	F	36	2019-08-23 12:27:54	2019-08-23	GENERAL PRACTICE	CEPHALEXIN	Acute upper respiratory infection, unspecified		Acute pharyngitis, unspecified	Inappropriate	unnecessary	27	Barka PolyClinic
85.8	F	82.8	no	srone on rt big toe		nail avulsed and lacaratioj +	M	60	2019-08-24 17:21:58	2019-08-24	GENERAL PRACTICE	CLOXACILLIN	Superficial injury of unspecified body region		Open wound of unspecified body region	Inappropriate	unnecessary	65	Barka PolyClinic
31.3	F	28.3	wbc in urine	burning micturation	pt came complain of burniing micturation for 2days	? General Examination:- =>General Condition :- Fair ; Jaundice :- No ; Pallor :- No ; Throat :- Clear ? Abdomen Examination:- =>Soft :- Yes;	M	41	2019-08-25 22:41:27	2019-08-25	GENERAL PRACTICE	CIPROFLOXACIN	Dysuria	Urinary Tract Infection	Urinary Tract Infection	Inappropriate	escalated use of extended-spectrum antibiotics	46	Barka PolyClinic
5	F	2	no	trauma rt big toe 2 days back as intraped in door	trauma rt big toe 2 days back as intraped in door blood was noticed on that time no h/o any major illness before	? General Examination:- =>Temp :- 36.4?C ; ; General Condition :- Fair ; Jaundice :- No ; Pallor :- No ; Clubbing :- No ; Cyanosis :- No ; Edema Feet :- No ; Dehydration :- No	M	46	2019-08-27 19:51:52	2019-08-27	GENERAL PRACTICE	CLOXACILLIN	Pain, unspecified	Injury, unspecified	Open wound of unspecified body region	Inappropriate	unnecessary	31	Barka PolyClinic
10.2	M	7.2	no	Redness, swelling lt.upper lid.			M	41	2019-08-29 15:20:36	2019-08-29	GENERAL PRACTICE	CLOXACILLIN	Hordeolum and other deep inflammation of eyelid	Chalazion	Chalazion	Inappropriate	unnecessary	44	Barka PolyClinic
32.7	M	29.7	no	acute tonsillitis	fever ,cough and sorethroat since 2 days k/c asthama not on inhaller	? General Examination:- =>Temp :- 37.2?C ; ; General Condition :- Fair ; Jaundice :- No ; Pallor :- No ; Throat :- Tonsillitis ? Respiratory Examination:- =>clear ? Abdomen Examination:- =>soft	M	52	2019-08-30 20:26:59	2019-08-30	GENERAL PRACTICE	CEPHALEXIN	Acute tonsillitis, unspecified		Acute tonsillitis, unspecified	Inappropriate	unnecessary	66	Barka PolyClinic
34.4	F	31.4	no	dental caries	dental caries for 3 days	dental caries	M	47	2019-08-31 21:59:54	2019-08-31	GENERAL PRACTICE	METRONIDAZOLE	Dental caries, unspecified		Gingivitis	Inappropriate	unnecessary	39	Barka PolyClinic
8.8	F	5.8	no	acute tonsillitis	fever .. cougfh . c.cold since yesterday .. no vomiting . no resp/distress	? General Examination:- =>Temp :- 37?C ; ; Pallor :- No ; Cyanosis :- No ; Throat :- Tonsillitis ? Respiratory Examination:- =>clear	M	46	2019-09-01 20:59:25	2019-09-01	GENERAL PRACTICE	AMOXYCILLIN	Acute tonsillitis, unspecified		Acute tonsillitis, unspecified	Inappropriate	unnecessary	44	Barka PolyClinic
10.4	M	7.4	no	diarrhea	loose watery stools for 1 day and other family members has same symtoms	? General Examination:- =>Temp :- 36.6?C ; ; General Condition :- Fair ; Dehydration :- No ; Throat :- Clear	M	47	2019-09-02 21:11:46	2019-09-02	GENERAL PRACTICE	METRONIDAZOLE	Diarrhoea and gastroenteritis of presumed infectious origin		Gastroenteritis of presumed infectious origin	Inappropriate	unnecessary	57	Barka PolyClinic
4.9	M	1.9	no	cough since one week or more.. already taken medications not improved .		? General Examination:- =>Temp :- 37?C ; ; Weight :- 12.7Kg ; ; Jaundice :- No ; Pallor :- No ; Clubbing :- No ; Cyanosis :- No ; Edema Feet :- No ; Throat :- Congested ? Respiratory Examination:- =>clear	F	48	2019-09-03 23:57:14	2019-09-03	GENERAL PRACTICE	AMOXYCILLIN	Acute upper respiratory infection, unspecified		Acute pharyngitis, unspecified	Inappropriate	unnecessary	42	Barka PolyClinic
13.6	M	10.6	no	ABDOMINAL PAIN WITH DIARRHOEA FOR 2 WEEKS. FEVER? NO VOMITING. NO BLOOD OR MUCUS IN THE STOOLS. NO SICK CONTACTS. NO RECENT TRAVEL HX. NO HX OF EATING FROM OUTSIDE. URINE OUTPUT IS FAIR. COUGH AND COLD+ PMH IS NOT SIGNIFICANT. NO KNOWN FOOD/DRUG ALLERGIES. STOOL R IS PENDING.		? General Examination:- =>Temp :- 36.6?C ; ; Weight :- 31Kg ; ; General Condition :- Fair ; Dehydration :- No ; Throat :- Clear ? Respiratory Examination:- =>NAD ? Abdomen Examination:- =>SOFT AND NONTENDER. ? CVS Examination:- =>S1S2+0 ? CNS Examination:- =>CONSCIOUS/ALERT	M	49	2019-09-05 17:53:53	2019-09-05	GENERAL PRACTICE	METRONIDAZOLE	Diarrhoea and gastroenteritis of presumed infectious origin		Gastroenteritis of presumed infectious origin	Inappropriate	unnecessary	32	Barka PolyClinic
43.2	M	40.2	no	cough, colds, toothache	C/o cough and colds since 4 days ago. No fever. Also having recurrent toothache on Rt side. No other complaints.	? General Examination:- =>BP :- 110/70 mmHg ; Temp :- 36?C ; ; General Condition :- Fair ; Pallor :- No ; Cyanosis :- No ; Throat :- Clear ? Respiratory Examination:- =>rhonchi BLF ? Abdomen Examination:- =>soft	M	53	2019-09-06 12:55:27	2019-09-06	GENERAL PRACTICE	CEPHALEXIN	Acute upper respiratory infection, unspecified		Acute pharyngitis, unspecified	Inappropriate	unnecessary	32	Barka PolyClinic
15.2	M	12.2	pos wbc in stool	blood in stool	blood in stool one time in afternoon . no vomiting . no fever .. no abdominal pain .. no constipation . no prevoius h/o blood in stool		M	46	2019-09-07 17:30:46	2019-09-07	GENERAL PRACTICE	METRONIDAZOLE	Pain, unspecified	Diarrhoea and gastroenteritis of presumed infectious origin	Gastroenteritis of presumed infectious origin	Inappropriate	incorrect spectrum of antibiotic	38	Barka PolyClinic
7.5	M	4.5	no	cough and c.cold	cough and c.cold since two days .. no fever . no resp .. distress	? General Examination:- =>Temp :- 36?C ; ; Pallor :- No ; Cyanosis :- No ; Throat :- Congested ? Respiratory Examination:- =>hvb	M	46	2019-09-08 17:45:24	2019-09-08	GENERAL PRACTICE	AMOXYCILLIN	Cough		Cough	Inappropriate	unnecessary	24	Barka PolyClinic
5.2	M	2.2	no	acute tonsillitis	fever cough and c.cold since two days . no vomiting	? General Examination:- =>Temp :- 38.5?C ; ; Pallor :- No ; Throat :- Tonsillitis ? Respiratory Examination:- =>clear	M	46	2019-09-09 23:07:04	2019-09-09	GENERAL PRACTICE	CEPHALEXIN	Acute tonsillitis, unspecified		Acute tonsillitis, unspecified	Inappropriate	unnecessary	28	Barka PolyClinic
24.7	M	21.7	no	sorethroat with fever and Rt ear otalgia	sorethroat with fever and Rt ear otalgia occured yesterday	? General Examination:- =>BP :- 110/70 mmHg ; Temp :- 37.5?C ; ; General Condition :- Fair ; Throat :- Congested ? Respiratory Examination:- =>Breath Sounds :- Vesicular;Rhonchi :- No;Crepitation :- No;	M	34	2019-09-11 09:56:08	2019-09-11	GENERAL PRACTICE	CEPHALEXIN	Acute pharyngitis, unspecified		Acute pharyngitis, unspecified	Inappropriate	unnecessary	37	Barka PolyClinic
4.9	M	1.9	no	viral exanthem	2 days ptc px had fever followed by erythematous papules on the mouth, feet and hands	? General Examination:- =>Weight :- 11Kg ; ; General Condition :- Fair ; Lymphadenopathy :- No ; Throat :- Clear	M	47	2019-09-12 18:10:26	2019-09-12	GENERAL PRACTICE	AMOXYCILLIN	Exanthema subitum [sixth disease]		Exanthema subitum [sixth disease]	Inappropriate	unnecessary	33	Barka PolyClinic
9.7	M	6.7	no	fever .. cough and c.cold	fever .. cough and c.cold since two days ,, no vomiting	? General Examination:- =>Temp :- 38?C ; ; Pallor :- No ; Cyanosis :- No ; Throat :- Congested ? Respiratory Examination:- =>clear	M	46	2019-09-13 12:52:40	2019-09-13	GENERAL PRACTICE	AMOXYCILLIN	Acute upper respiratory infection, unspecified		Acute pharyngitis, unspecified	Inappropriate	unnecessary	32	Barka PolyClinic
5.4	M	2.4	no	child w/ cold fever for 3 days diarrhea more than 5 episodes no vomitting was seen in Wadi Mawel HC for Lymphadentitis and givent 09/09/2019		? General Examination:- =>Temp :- 37.8?C ; ; Weight :- 11.8Kg ; ; General Condition :- Looks Well ; Jaundice :- No ; Pallor :- No ; Throat :- Congested ? Respiratory Examination:- =>clear ? Abdomen Examination:- =>soft and lax	M	33	2019-09-14 00:54:27	2019-09-14	GENERAL PRACTICE	CEPHALEXIN	Fever, unspecified	Acute nasopharyngitis [common cold]	Acute pharyngitis, unspecified	Inappropriate	unnecessary	40	Barka PolyClinic
10.8	F	7.8	no	cut wound	a few minutes ptc px fell hitting her chin	? General Examination:- =>0.5 cm laceration on the chin requiring 2 simple interrupted suture	M	47	2019-09-14 18:47:29	2019-09-14	GENERAL PRACTICE	CLOXACILLIN	Open wound of head, part unspecified		Open wound of unspecified body region	Inappropriate	unnecessary	36	Barka PolyClinic
45.2	M	42.2	no	patient have back swelling		? General Examination:- =>General Condition :- Fair	M	47	2019-09-15 11:26:25	2019-09-15	GENERAL PRACTICE	CEPHALEXIN	Cutaneous abscess, furuncle and carbuncle of trunk		Cutaneous abscess, furuncle and carbuncle, unspecified	Appropriate	Appropriate	34	Barka PolyClinic
67.8	F	64.8	wbc in urine	DM, HTN, rhumatoid arthritis following in AFH h/o renal stones before came with h/o low back pain for 3 weeks no h/o trauma, fall increased with movement no dysuria had h/o constipation before now releived visited private clinic given analgesia still in pain			M	47	2019-09-16 08:25:01	2019-09-16	GENERAL PRACTICE	CEPHALEXIN	Low back pain	Urinary Tract Infection	Urinary Tract Infection	Appropriate	Appropriate	29	Barka PolyClinic
17.9	M	14.9	no	fever ... sore throat with cough 1 day ago		? General Examination:- =>Temp :- 38.1?C ; ; General Condition :- Fair ; Pallor :- No ; Cyanosis :- No ; Dehydration :- No ; Throat :- Tonsillitis ? Respiratory Examination:- =>clear ? CVS Examination:- =>nad	M	47	2019-09-17 07:24:23	2019-09-17	GENERAL PRACTICE	CEPHALEXIN	Acute tonsillitis, unspecified		Acute tonsillitis, unspecified	Inappropriate	unnecessary	32	Barka PolyClinic
9	M	6	no	lt ankle cut wound, laceration given 3 sutures using 2"0 under la		? General Examination:- =>Weight :- 16.2Kg ;	M	33	2019-09-18 15:05:36	2019-09-18	GENERAL PRACTICE	AMOXYCILLIN	Open wound of unspecified body region		Open wound of unspecified body region	Appropriate	Appropriate	37	Barka PolyClinic
20	M	17	no	FEVER, SORE THROAT AND COLD SINCE YESTERDAY. AS PER THE PATIENT, HIS PMH IS NOT SIGNIFICANT. DRYNESS OF HIS UPPER LIP WITH SCALING.		? General Examination:- =>Temp :- 36.9?C ; ; Throat :- Congested ? Respiratory Examination:- =>NAD	M	49	2019-09-19 11:32:20	2019-09-19	GENERAL PRACTICE	CEPHALEXIN	Acute pharyngitis, unspecified		Acute pharyngitis, unspecified	Inappropriate	unnecessary	33	Barka PolyClinic
7.3	M	4.3	no	fever cough cold		? General Examination:- =>Temp :- 36?C ; ; General Condition :- Fair ; Throat :- Congested ? Respiratory Examination:- =>clear ? CVS Examination:- =>nad	F	36	2019-09-20 22:50:24	2019-09-20	GENERAL PRACTICE	AMOXYCILLIN	Acute upper respiratory infection, unspecified		Acute pharyngitis, unspecified	Inappropriate	unnecessary	42	Barka PolyClinic
44.6	F	41.6	high wbc and neutrophil	fever on and off since 2 week also ahve cough today vomiting once time no sob , normal bowel habitt seen on private several time ,, tack medication ,, still not improved		? General Examination:- =>Temp :- 36.9?C ; ; General Condition :- Fair ; Jaundice :- No ; Pallor :- No ; Throat :- Congested	F	38	2019-09-20 08:17:54	2019-09-20	GENERAL PRACTICE	CEFUROXIME	Fever, unspecified	Sepsis	Sepsis	Appropriate	Appropriate	25	Barka PolyClinic
3.3	M	1	no	common colds	common colds for 1 week with eye dischrage	? General Examination:- =>Appearance :- rhinorrhea eye discharge bilateral ; Weight :- 6.6Kg ; ; General Condition :- Fair ; Lymphadenopathy :- Yes ; Throat :- Clear ? Respiratory Examination:- =>Respiratory_distress :- No;Breath Sounds :- Vesicular;	M	47	2019-09-21 15:27:40	2019-09-21	GENERAL PRACTICE	AMOXYCILLIN	Acute upper respiratory infection, unspecified		Acute pharyngitis, unspecified	Inappropriate	unnecessary	36	Barka PolyClinic
39.7	F	36.7	no	sore throat since three days rt eye redness		? General Examination:- =>Temp :- 36.6?C ; ; General Condition :- Looks Well ; Jaundice :- No ; Pallor :- No ; Clubbing :- No ; Throat :- Congested	F	48	2019-09-22 13:25:40	2019-09-22	GENERAL PRACTICE	CEPHALEXIN	Acute nasopharyngitis [common cold]		Acute pharyngitis, unspecified	Inappropriate	unnecessary	53	Barka PolyClinic
4.7	M	1.7	no	common colds	common colds and fever for1 day	? General Examination:- =>Weight :- 10Kg ; ; General Condition :- Fair ; Lymphadenopathy :- Yes ; Throat :- Clear ? Respiratory Examination:- =>Respiratory_distress :- No;Breath Sounds :- Bronchial;	M	47	2019-09-23 06:33:02	2019-09-23	GENERAL PRACTICE	AMOXYCILLIN	Acute upper respiratory infection, unspecified		Acute pharyngitis, unspecified	Inappropriate	unnecessary	24	Barka PolyClinic
27.9	F	24.9	no	she have some scalp small lesion .. soft rounded lesion .. also complain of reccurent attacks of unilateral headache .. have appoitment tomorrow with medicine migrane ??		? General Examination:- =>BP :- 132/90 mmHg ; General Condition :- Fair ; Pallor :- No ; Cyanosis :- No ; Throat :- Congested	M	47	2019-09-24 10:58:57	2019-09-24	GENERAL PRACTICE	ERYTHROMYCIN	Headache		Headache	Inappropriate	unnecessary	28	Barka PolyClinic
7.5	M	4.5	no	fever since morning. cold+ vomited once in the morning. rt conjuncitivitis-already seen at Paediatrics for it and placed on eye drops.		? General Examination:- =>Temp :- 37.7?C ; ; Weight :- 20Kg ; ; General Condition :- Fair ; Lymphadenopathy :- Yes ; Throat :- Tonsillitis ? Respiratory Examination:- =>nad ? CVS Examination:- =>s1s2+0	M	49	2019-09-25 18:09:52	2019-09-25	GENERAL PRACTICE	CEPHALEXIN	Fever, unspecified	Acute nasopharyngitis [common cold]	Acute pharyngitis, unspecified	Inappropriate	unnecessary	36	Barka PolyClinic
7.3	F	4.3	no	cough	cough and colds for 2 days	? General Examination:- =>Weight :- 12.9Kg ; ; Lymphadenopathy :- Yes ; Throat :- Congested ? Respiratory Examination:- =>Respiratory_distress :- No;Breath Sounds :- Reduced Intensity;	M	47	2019-09-26 17:47:50	2019-09-26	GENERAL PRACTICE	AMOXYCILLIN	Acute pharyngitis, unspecified		Acute pharyngitis, unspecified	Inappropriate	unnecessary	36	Barka PolyClinic
8.6	F	5.6	no	fever, throat pain, colds	H/o fever with throat pain since yesterday. Also with colds 2 days ago but no cough. No other complaints.	? General Examination:- =>Temp :- 38.5?C ; ; Weight :- 14.5Kg ; ; General Condition :- Fair ; Pallor :- No ; Cyanosis :- No ; Throat :- Congested ? Respiratory Examination:- =>Breath Sounds :- Vesicular;Rhonchi :- No;Crepitation :- No;	M	53	2019-09-27 13:54:29	2019-09-27	GENERAL PRACTICE	AMOXYCILLIN	Acute pharyngitis, unspecified		Acute pharyngitis, unspecified	Inappropriate	unnecessary	34	Barka PolyClinic
4.6	F	1.6	no	COUGH WITH SOB SINCE 2 DAYS ALSO HAVE FEVER NO VOMITING		? General Examination:- =>General Condition :- Fair ; Jaundice :- No ; Pallor :- No ; Throat :- Congested ? Respiratory Examination:- =>wheez	F	38	2019-09-28 00:31:44	2019-09-28	GENERAL PRACTICE	AMOXYCILLIN	Cough		Cough	Inappropriate	unnecessary	56	Barka PolyClinic
36.3	F	33.3	wbc in urine		burning micturition , and fever since yesterday ,, a with low abd pain z	bp 110/60 mmhg	F	36	2019-09-28 18:42:23	2019-09-28	GENERAL PRACTICE	CIPROFLOXACIN	Dysuria	Urinary Tract Infection	Urinary Tract Infection	Inappropriate	escalated use of extended-spectrum antibiotics	46	Barka PolyClinic
10.2	F	7.2	no	hx of cough , c.cold , fever since 4 day no vomitting , normalbolw habite		? General Examination:- =>General Condition :- Fair ; Pallor :- No ; Cyanosis :- No ; Dehydration :- No ; Throat :- Congested temp 38.3 ? Respiratory Examination:- =>clear ? CVS Examination:- =>s1s2 ? CNS Examination:- =>intact	F	30	2019-09-29 17:56:55	2019-09-29	GENERAL PRACTICE	AMOXYCILLIN	Acute pharyngitis, unspecified		Acute pharyngitis, unspecified	Inappropriate	unnecessary	47	Barka PolyClinic
14.3	M	11.3	no	sore thorat with flu and fever since three days		? General Examination:- =>Temp :- 37.7?C ; ; Weight :- 82.1Kg ; ; Jaundice :- No ; Pallor :- No ; Clubbing :- No ; Cyanosis :- No ; Throat :- Clear ? Respiratory Examination:- =>clear	F	48	2019-09-30 19:05:48	2019-09-30	GENERAL PRACTICE	CEPHALEXIN	Acute nasopharyngitis [common cold]		Acute pharyngitis, unspecified	Inappropriate	unnecessary	51	Barka PolyClinic
7.9	F	4.9	no	fever ,cough and cold	fever ,cough and cold since 2 days	? General Examination:- =>Temp :- 36.8?C ; ; General Condition :- Looks Well ; Jaundice :- No ; Pallor :- No ; Throat :- Congested ? Respiratory Examination:- =>Breath Sounds :- Vesicular;Rhonchi :- No;Crepitation :- No; ? Abdomen Examination:- =>soft	M	52	2019-10-01 14:42:52	2019-10-01	GENERAL PRACTICE	AMOXYCILLIN	Acute upper respiratory infection, unspecified		Acute pharyngitis, unspecified	Inappropriate	unnecessary	37	Barka PolyClinic
4.2	F	1.2	no	fever and flu sine few days also have vomiting several time sinc e few hours		? General Examination:- =>Temp :- 38.3?C ; ; General Condition :- Fair ; Jaundice :- No ; Pallor :- No ; Throat :- Congested ? Respiratory Examination:- =>clear	F	38	2019-10-02 23:58:08	2019-10-02	GENERAL PRACTICE	AMOXYCILLIN	Acute pharyngitis, unspecified		Acute pharyngitis, unspecified	Inappropriate	unnecessary	40	Barka PolyClinic
41	F	38	wbc in urine	low back pain 5 days ago .. patient came with reccurent attacks of dizziness.. history of liver disease (fibrosis ??) follow at RH .. not under any medication .. dysuria .. abdominal gasses ++		? General Examination:- =>BP :- 144/90 mmHg ; General Condition :- Fair ; Pallor :- No ; Cyanosis :- No ; Dehydration :- No ? Respiratory Examination:- =>clear ? Abdomen Examination:- =>soft	M	47	2019-10-02 13:37:09	2019-10-02	GENERAL PRACTICE	CIPROFLOXACIN	Unspecified renal colic		Urinary Tract Infection	Inappropriate	escalated use of extended-spectrum antibiotics	27	Barka PolyClinic
6.8	M	3.8	no	acute tonsillitis	fever .. sore throat . cough and c.cold since wk no vomiting . no resp . distress	? General Examination:- =>Temp :- 38?C ; ; Throat :- Tonsillitis ? Respiratory Examination:- =>clear	M	46	2019-10-04 21:32:35	2019-10-04	GENERAL PRACTICE	AUGMENTIN	Acute tonsillitis, unspecified		Acute tonsillitis, unspecified	Inappropriate	unnecessary	47	Barka PolyClinic
6.6	M	3.6	no	fever ,, pain in throat // 2 days no vomiting or diarrhea ,, no urinary complains father denies asthma or scd or g6pd no other complain		? General Examination:- =>Weight :- 12Kg ; ; General Condition :- Fair ; Jaundice :- No ; Pallor :- No ; Throat :- Tonsillitis ? Respiratory Examination:- =>conducted sounds ,, HVB	F	41	2019-10-04 08:42:23	2019-10-04	GENERAL PRACTICE	AMOXYCILLIN	Acute upper respiratory infection, unspecified		Acute pharyngitis, unspecified	Inappropriate	unnecessary	38	Barka PolyClinic
5.2	M	2.2	no	fever, cough, colds	H/o fever with cough and colds since 2 days ago. Also with throat pain. No other complaints.	? General Examination:- =>Temp :- 37?C ; ; General Condition :- Fair ; Pallor :- No ; Cyanosis :- No ; Throat :- Tonsillitis ? Respiratory Examination:- =>harsh BS ? Abdomen Examination:- =>soft	M	53	2019-10-05 17:23:04	2019-10-05	GENERAL PRACTICE	AMOXYCILLIN	Acute tonsillitis, unspecified		Acute tonsillitis, unspecified	Inappropriate	unnecessary	50	Barka PolyClinic
38.4	M	35.4	no	c.cold with cough and fever 1 day ago		? General Examination:- =>BP :- 98/68 mmHg ; General Condition :- Fair ; Pallor :- No ; Cyanosis :- No ; Dehydration :- No ; Throat :- Congested ? Respiratory Examination:- =>clear	M	47	2019-10-06 13:08:27	2019-10-06	GENERAL PRACTICE	CEPHALEXIN	Acute pharyngitis, unspecified		Acute pharyngitis, unspecified	Inappropriate	unnecessary	31	Barka PolyClinic
29.8	M	26.8	no	Lt side tooth pain with mild swelling of Lt cheek	C/o Lt sided tooth pain with mild swelling of Lt cheek since yesterday. Unable to sleep well. No other complaints. Dental clinic under renovation.	? General Examination:- =>BP :- 120/80 mmHg ; Temp :- 36?C ; ; General Condition :- Fair ; Pallor :- No ; Cyanosis :- No ? Respiratory Examination:- =>Breath Sounds :- Vesicular;Rhonchi :- No;Crepitation :- No;	M	53	2019-10-07 12:44:11	2019-10-07	GENERAL PRACTICE	CLOXACILLIN	Pain, unspecified	Gingivitis	Gingivitis	Inappropriate	unnecessary	34	Barka PolyClinic
65.6	M	62.6	no	bee sting on face yesterday	bee sting on face yesterday no cough no dyspnoea	? General Examination:- =>Temp :- 36.5?C ; ; General Condition :- Fair ; Jaundice :- No ; Pallor :- No ; Clubbing :- No ; Cyanosis :- No ; Edema Feet :- No ; Dehydration :- No	M	46	2019-10-08 10:28:01	2019-10-08	GENERAL PRACTICE	CLOXACILLIN	Pain, unspecified	Toxic effect of venom of bees	Toxic effect of venom of bees	Inappropriate	unnecessary	32	Barka PolyClinic
25.1	M	22.1	no	dental pain	dental pain since yesterday took paracetamol but no releif h/o asthama in past but not on inhaller since long time	? General Examination:- =>General Condition :- Fair ; Jaundice :- No ; Pallor :- No	M	52	2019-10-08 23:17:17	2019-10-08	GENERAL PRACTICE	METRONIDAZOLE	Dental caries, unspecified		Gingivitis	Inappropriate	unnecessary	63	Barka PolyClinic
18.5	F	15.5	no	c/o swelling in her right arm pit causing pain and fever abscess		? General Examination:- =>Temp :- 37?C ; ; General Condition :- Fair ; Jaundice :- No ; Pallor :- No	F	41	2019-10-09 21:48:24	2019-10-09	GENERAL PRACTICE	CLOXACILLIN	Cutaneous abscess, furuncle and carbuncle, unspecified		Cutaneous abscess, furuncle and carbuncle, unspecified	Appropriate	Appropriate	33	Barka PolyClinic
5.3	M	2.3	no	comon cold	pt came complain of comon cold ass, with left ear ache	? General Examination:- =>Temp :- 39.3?C ; ; General Condition :- Fair ; Jaundice :- No ; Pallor :- No ; Throat :- Clear ? Respiratory Examination:- =>Breath Sounds :- Vesicular;Rhonchi :- No;Crepitation :- No;	M	35	2019-10-10 22:35:09	2019-10-10	GENERAL PRACTICE	AMOXYCILLIN	Acute upper respiratory infection, unspecified		Acute pharyngitis, unspecified	Inappropriate	unnecessary	43	Barka PolyClinic
4.7	F	1.7	no	common colds	common colds witheye discharge for 1 day	? General Examination:- =>Appearance :- rhinorrhea keratoconjunctival erythema bilateral patent tympanum bilateral with retained cerumen ; Temp :- 36.7?C ; ; Weight :- 9.7Kg ; ; General Condition :- Fair ; Lymphadenopathy :- Yes ? Respiratory Examination:- =>Respiratory_distress :- No;Breath Sounds :- Vesicular;	M	47	2019-10-11 18:19:03	2019-10-11	GENERAL PRACTICE	AMOXYCILLIN	Acute upper respiratory infection, unspecified		Acute pharyngitis, unspecified	Inappropriate	unnecessary	35	Barka PolyClinic
20	F	17	no	hx of cough , c.cold , fever since 3 day no vomitting		? General Examination:- =>General Condition :- Fair ; Pallor :- No ; Cyanosis :- No ; Dehydration :- No ; Throat :- Tonsillitis ? Respiratory Examination:- =>clear ? CNS Examination:- =>intact	F	30	2019-10-12 19:45:24	2019-10-12	GENERAL PRACTICE	CEPHALEXIN	Acute upper respiratory infection, unspecified		Acute pharyngitis, unspecified	Inappropriate	unnecessary	38	Barka PolyClinic
38.9	F	35.9	neg	complains of diarrhea, 3 episodes no vomitting no dysuria no other complaints		? General Examination:- =>BP :- 110/70 mmHg ; General Condition :- Fair ; Jaundice :- No	M	33	2019-10-12 06:24:29	2019-10-12	GENERAL PRACTICE	METRONIDAZOLE	Diarrhoea and gastroenteritis of presumed infectious origin		Gastroenteritis of presumed infectious origin	Inappropriate	unnecessary	35	Barka PolyClinic
4	F	1	no	Fever, cough, cold	A 1-Year old baby girl, brought with history of fever, cough and cold.....since few days.	? General Examination:- =>Temp :- 38?C ; ; General Condition :- Looks Well ; Throat :- Congested ? Respiratory Examination:- =>Chest Shape :- Normal; Respiratory_distress :- No;Rhonchi :- No;Crepitation :- No; ? CVS Examination:- =>First Heart Sound:- Normal ; second Heart Sound:- Normal	M	41	2019-10-13 20:11:21	2019-10-13	GENERAL PRACTICE	AMOXYCILLIN	Acute nasopharyngitis [common cold]		Acute pharyngitis, unspecified	Inappropriate	unnecessary	46	Barka PolyClinic
3.5	F	0.5	no	fever since three days mild cough no flu	today fever 39	? General Examination:- =>Temp :- 37.7?C ; ; SPO2 :- 100 ; General Condition :- Looks Well ; Jaundice :- No ; Pallor :- No ; Clubbing :- No ; Throat :- Congested ? Respiratory Examination:- =>clear	F	48	2019-10-14 19:53:12	2019-10-14	GENERAL PRACTICE	AMOXYCILLIN	Acute upper respiratory infection, unspecified		Acute pharyngitis, unspecified	Inappropriate	unnecessary	36	Barka PolyClinic
25.9	M	22.9	no	ari	cough,running nose since yesterday no neck rigidity no vomiting no dyspnoea no skin rashes bowel habit normal	? General Examination:- =>Temp :- 36.7?C ; ; General Condition :- Fair ; Jaundice :- No ; Pallor :- No ; Clubbing :- No ; Cyanosis :- No ; Edema Feet :- No ; Dehydration :- No	M	46	2019-10-15 21:35:14	2019-10-15	GENERAL PRACTICE	CEPHALEXIN	Acute pharyngitis, unspecified		Acute pharyngitis, unspecified	Inappropriate	unnecessary	54	Barka PolyClinic
5.2	M	2.2	no	cough, colds	H/o cough and colds since a week ago. No fever. This is recurrent according to father. No other complaints.	? General Examination:- =>Temp :- 36.4?C ; ; Weight :- 12.6Kg ; ; General Condition :- Fair ; Pallor :- No ; Cyanosis :- No ; Throat :- Congested ? Respiratory Examination:- =>harsh BS ? Abdomen Examination:- =>soft	M	53	2019-10-16 20:51:05	2019-10-16	GENERAL PRACTICE	AMOXYCILLIN	Acute upper respiratory infection, unspecified		Acute pharyngitis, unspecified	Inappropriate	unnecessary	53	Barka PolyClinic
44.1	F	41.1	no	fever cough cold		? General Examination:- =>BP :- 105/60 mmHg ; Temp :- 38.6?C ; ; General Condition :- Fair ; Throat :- Tonsillitis ? Respiratory Examination:- =>clear ? CVS Examination:- =>nad	F	36	2019-10-17 17:41:43	2019-10-17	GENERAL PRACTICE	CEPHALEXIN	Acute tonsillitis, unspecified		Acute tonsillitis, unspecified	Inappropriate	unnecessary	53	Barka PolyClinic
6.7	M	3.7	no	scalp injury. no S&S of TBI.			M	49	2019-10-18 19:13:47	2019-10-18	GENERAL PRACTICE	AMOXYCILLIN	Open wound of scalp		Open wound of unspecified body region	Inappropriate	unnecessary	44	Barka PolyClinic
46.8	F	43.8	no	ari	cough,running nose with throat pain & occasional vomiting since 2 days no neck rigidity no dyspnoea no drooling of salavia no skin rashes bowel habit normal	? General Examination:- =>Temp :- 38.2?C ; ; General Condition :- Fair ; Jaundice :- No ; Pallor :- No ; Clubbing :- No ; Cyanosis :- No ; Edema Feet :- No ; Dehydration :- No	M	46	2019-10-18 09:15:07	2019-10-18	GENERAL PRACTICE	PHENOXYMETHYLPENICILLIN	Acute tonsillitis, unspecified		Acute tonsillitis, unspecified	Inappropriate	unnecessary	34	Barka PolyClinic
9.9	M	6.9	no	cough ,, common cold ,, fever on and off // 2 days father denies h/o asthma , scd or g6pd no other complain		? General Examination:- =>Temp :- 36.4?C ; ; Weight :- 18Kg ; ; General Condition :- Fair ; Jaundice :- No ; Pallor :- No ; Throat :- Congested ? Respiratory Examination:- =>conducted sounds ,, HVB	F	41	2019-10-19 08:58:52	2019-10-19	GENERAL PRACTICE	CEPHALEXIN	Acute pharyngitis, unspecified		Acute pharyngitis, unspecified	Inappropriate	unnecessary	40	Barka PolyClinic
35.6	F	32.6	no	cough	known asthma case in acute exacerbation. px also has low back pain with dysuria	? General Examination:- =>BP :- 130/80 mmHg ; General Condition :- Fair ; Pallor :- No ; Throat :- Clear ? Respiratory Examination:- =>Respiratory_distress :- No;Rhonchi :- Yes;	M	47	2019-10-20 12:48:02	2019-10-20	GENERAL PRACTICE	CEPHALEXIN	Asthma, unspecified		Asthma, unspecified	Inappropriate	unnecessary	30	Barka PolyClinic
18.7	M	15.7	no	urti	fever ,cough and sorethroat since 2 days seen at lhc today on medication but still the same	? General Examination:- =>Temp :- 38.4?C ; ; General Condition :- Fair ; Jaundice :- No ; Pallor :- No ; Throat :- Congested ? Respiratory Examination:- =>Breath Sounds :- Vesicular;Rhonchi :- No;Crepitation :- No;	M	52	2019-10-21 23:37:13	2019-10-21	GENERAL PRACTICE	CEPHALEXIN	Acute upper respiratory infection, unspecified		Acute pharyngitis, unspecified	Inappropriate	unnecessary	49	Barka PolyClinic
17	M	14	no	SORE THROAT AND FEVER FOR 2 DAYS. CHILLS+ PMH IS NOT SIGNIFICANT.		? General Examination:- =>Temp :- 38.1?C ; ; General Condition :- Fair ; Lymphadenopathy :- Yes ; Throat :- Tonsillitis ? Respiratory Examination:- =>NAD	M	49	2019-10-21 02:35:21	2019-10-21	GENERAL PRACTICE	CEPHALEXIN	Acute tonsillitis, unspecified		Acute tonsillitis, unspecified	Inappropriate	incorrect spectrum of antibiotic	25	Barka PolyClinic
35.5	F	32.5	no	fever .. cough flu denied pregnency also c/o breast pain her appointment due for u/s breast in muscat hosp		? General Examination:- =>BP :- 120/70 mmHg ; Temp :- 38?C ; ; General Condition :- Fair ; Throat :- Tonsillitis ? Respiratory Examination:- =>clear	F	36	2019-10-22 21:53:03	2019-10-22	GENERAL PRACTICE	CEPHALEXIN	Acute tonsillitis, unspecified		Acute tonsillitis, unspecified	Inappropriate	unnecessary	31	Barka PolyClinic
5.8	M	2.8	no	fever	pt came complain of fever ass. with vomiting for 1day	? General Examination:- =>Temp :- 38.1?C ; ; Weight :- 13.8Kg ; ; General Condition :- Fair ; Jaundice :- No ; Dehydration :- No ; Throat :- Tonsillitis ? Respiratory Examination:- =>Breath Sounds :- Vesicular;Rhonchi :- No;Crepitation :- No; ? Abdomen Examination:- =>Soft :- Yes;	M	35	2019-10-23 19:41:53	2019-10-23	GENERAL PRACTICE	AMOXYCILLIN	Acute tonsillitis, unspecified		Acute tonsillitis, unspecified	Inappropriate	unnecessary	47	Barka PolyClinic
14.4	M	11.4	neg	fever and sore throat. denies cough/cold.		? General Examination:- =>Temp :- 37.1?C ; ; Throat :- Congested ? Respiratory Examination:- =>nad	M	49	2019-10-24 20:12:06	2019-10-24	GENERAL PRACTICE	CEPHALEXIN	Fever, unspecified	Acute nasopharyngitis [common cold]	Acute pharyngitis, unspecified	Inappropriate	unnecessary	42	Barka PolyClinic
73.8	F	70.8	no	cough cold sore throat no dyspnea no chest pain		? General Examination:- =>BP :- 130/60 mmHg ; Temp :- 36?C ; ; General Condition :- Fair ; Throat :- Congested ? Respiratory Examination:- =>Breath Sounds :- Vesicular;Rhonchi :- No;Crepitation :- No; ? CVS Examination:- =>First Heart Sound:- Normal ; second Heart Sound:- Normal ; Murmur :- No	F	36	2019-10-25 14:41:07	2019-10-25	GENERAL PRACTICE	CEPHALEXIN	Acute pharyngitis, unspecified		Acute pharyngitis, unspecified	Inappropriate	unnecessary	38	Barka PolyClinic
11	F	8	no	fever	pt came complain of fever ass. with cough and comon cold for 3days	? General Examination:- =>Temp :- 38?C ; ; General Condition :- Fair ; Jaundice :- No ; Pallor :- No ; Throat :- Congested ? Respiratory Examination:- =>Breath Sounds :- Vesicular;Rhonchi :- No;Crepitation :- No;	M	35	2019-10-26 14:04:04	2019-10-26	GENERAL PRACTICE	AMOXYCILLIN	Acute nasopharyngitis [common cold]		Acute pharyngitis, unspecified	Inappropriate	unnecessary	23	Barka PolyClinic
12.9	F	9.9	no	urti	fever ,cough ,cold and sorethroat since 2 days	? General Examination:- =>Temp :- 38.2?C ; ; Weight :- 35Kg ; ; General Condition :- Fair ; Jaundice :- No ; Pallor :- No ; Throat :- Congested ? Respiratory Examination:- =>clear	M	52	2019-10-26 00:29:41	2019-10-26	GENERAL PRACTICE	CEPHALEXIN	Acute upper respiratory infection, unspecified		Acute pharyngitis, unspecified	Inappropriate	unnecessary	40	Barka PolyClinic
41.6	F	38.6	no	c/o cough flu sore throat nasal blockage rt nostril skin lesion mild streak of blood		? General Examination:- =>Temp :- 36?C ; ; General Condition :- Fair ; Throat :- Congested ? Respiratory Examination:- =>clear ? CVS Examination:- =>nad	F	36	2019-10-27 12:38:57	2019-10-27	GENERAL PRACTICE	CEPHALEXIN	Acute upper respiratory infection, unspecified		Acute pharyngitis, unspecified	Inappropriate	unnecessary	44	Barka PolyClinic
7.1	M	4.1	no	rt otalgia since today .. mild cough and flu .. no fever	on exam fungal infection	? General Examination:- =>Temp :- 36.6?C ; ; Weight :- 18Kg ; ; Throat :- Congested	F	48	2019-10-28 21:13:04	2019-10-28	GENERAL PRACTICE	AMOXYCILLIN	Otitis externa, unspecified	Otitis externa, unspecified	Otitis externa, unspecified	Inappropriate	unnecessary	48	Barka PolyClinic
6.1	M	3.1	no	fever with cough 2 days ago		? General Examination:- =>Temp :- 38?C ; ; Weight :- 12.8Kg ; ; Pallor :- No ; Cyanosis :- No ; Dehydration :- No ; Throat :- Congested ? Respiratory Examination:- =>rhonchi + ? CVS Examination:- =>nad	M	47	2019-10-28 06:14:55	2019-10-28	GENERAL PRACTICE	CEPHALEXIN	Acute bronchitis, unspecified		Acute bronchitis, unspecified	Inappropriate	unnecessary	20	Barka PolyClinic
14.6	F	11.6	no	lt otalgia no discharge no fever	on exam rt ear wax lt ear mild congestion in external ear	? General Examination:- =>Weight :- 21.7Kg ; ; General Condition :- Looks Well ; Jaundice :- No ; Pallor :- No ; Clubbing :- No	F	48	2019-10-29 20:57:32	2019-10-29	GENERAL PRACTICE	AMOXYCILLIN	Otalgia		Otalgia	Inappropriate	unnecessary	45	Barka PolyClinic
3.4	F	1	no	eye discharges, fever, cough, colds	H/o eye discharges since about a week ago. Also with fever yesterday with cough and colds. No other complaints. Pt is feeding well. Given Adol drops an hour ago.	? General Examination:- =>Temp :- 37?C ; ; Weight :- 7.2Kg ; ; General Condition :- Fair ; Pallor :- No ; Cyanosis :- No ; Throat :- Congested ? Respiratory Examination:- =>mild rhonchi BLF ? Abdomen Examination:- =>soft	M	53	2019-10-30 18:04:23	2019-10-30	GENERAL PRACTICE	AMOXYCILLIN	Acute upper respiratory infection, unspecified		Acute pharyngitis, unspecified	Inappropriate	unnecessary	52	Barka PolyClinic
4.2	M	1.2	no	fever, cough, colds	H/o fever with cough and colds since more than a week ago. No other complaints.	? General Examination:- =>Temp :- 36?C ; ; Weight :- 8.2Kg ; ; General Condition :- Fair ; Pallor :- No ; Cyanosis :- No ; Throat :- Congested ? Respiratory Examination:- =>harsh BS ? Abdomen Examination:- =>soft	M	53	2019-10-31 18:54:29	2019-10-31	GENERAL PRACTICE	AMOXYCILLIN	Acute upper respiratory infection, unspecified		Acute pharyngitis, unspecified	Inappropriate	unnecessary	40	Barka PolyClinic
8.5	M	5.5	no	acute tonsillitis // 2 days fever + given adol at home twice last dose 1 hr back		? General Examination:- =>Weight :- 23.7Kg ; ; General Condition :- Fair ; Jaundice :- No ; Pallor :- No ; Throat :- Tonsillitis	F	41	2019-11-01 15:03:36	2019-11-01	GENERAL PRACTICE	AUGMENTIN	Acute tonsillitis, unspecified		Acute tonsillitis, unspecified	Inappropriate	unnecessary	44	Barka PolyClinic
11.7	F	8.7	no	urti	fever ,cough and cold since 2 days case of down syndrome	? General Examination:- =>Temp :- 37.8?C ; ; General Condition :- Fair ; Jaundice :- No ; Pallor :- No ; Throat :- Congested ? Respiratory Examination:- =>hvb ? Abdomen Examination:- =>soft	M	52	2019-11-02 00:15:35	2019-11-02	GENERAL PRACTICE	CEPHALEXIN	Acute upper respiratory infection, unspecified		Acute pharyngitis, unspecified	Inappropriate	unnecessary	31	Barka PolyClinic
19	M	16	no	no PMH hx of abcess in the rt knee? since 2 day dressing done at the home , look inflammed redness abscess dischrgae		? General Examination:- =>General Condition :- Fair ; Pallor :- No ; Cyanosis :- No ; Dehydration :- No around 3*3 cm abcsess discharge ? CNS Examination:- =>intact	F	30	2019-11-02 17:39:05	2019-11-02	GENERAL PRACTICE	CLOXACILLIN	Cutaneous abscess, furuncle and carbuncle, unspecified		Cutaneous abscess, furuncle and carbuncle, unspecified	Appropriate	Appropriate	48	Barka PolyClinic
9.9	M	6.9	no	fever .. cough vomiting normal bh father came to collect medicine		? General Examination:- =>General Condition :- Fair	F	36	2019-11-03 18:31:48	2019-11-03	GENERAL PRACTICE	AMOXYCILLIN	Acute upper respiratory infection, unspecified		Acute pharyngitis, unspecified	Inappropriate	unnecessary	56	Barka PolyClinic
5.8	M	2.8	no	cough	cough and colds with fever for 2 days	? General Examination:- =>Appearance :- rhinorrhea ; Temp :- 36.7?C ; ; Weight :- 10.4Kg ; ; General Condition :- Fair ; Lymphadenopathy :- Yes ; Throat :- Congested ? Respiratory Examination:- =>Respiratory_distress :- No;Breath Sounds :- Vesicular;	M	47	2019-11-04 03:34:30	2019-11-04	GENERAL PRACTICE	AMOXYCILLIN	Acute upper respiratory infection, unspecified		Acute pharyngitis, unspecified	Inappropriate	unnecessary	23	Barka PolyClinic
31.9	F	28.9	no	c/o tonsillitis and common cold		? General Examination:- =>Temp :- 36.3?C ; ; General Condition :- Fair ; Cyanosis :- No ; Dehydration :- No ; Throat :- Tonsillitis ? Respiratory Examination:- =>clear ? CVS Examination:- =>First Heart Sound:- Normal ; second Heart Sound:- Normal	F	53	2019-11-05 11:05:57	2019-11-05	GENERAL PRACTICE	CEPHALEXIN	Acute tonsillitis, unspecified		Acute tonsillitis, unspecified	Inappropriate	unnecessary	28	Barka PolyClinic
70.8	F	67.8	no	low back pain with right loin pain since 3 days no fever , also having dental pain		? General Examination:- =>Temp :- 36.3?C ; ; General Condition :- Fair ; Jaundice :- No ; Pallor :- No ; Throat :- Congested ? Abdomen Examination:- =>no localized area of tenderness	F	41	2019-11-05 23:46:35	2019-11-05	GENERAL PRACTICE	CEPHALEXIN	Pain, unspecified		Pain, unspecified	Inappropriate	unnecessary	45	Barka PolyClinic
17.8	M	14.8	no	Cut wound	Cut wound with knife on palm of rt.hand. Sutured under L/A.	? General Examination:- =>General Condition :- Looks Well	M	41	2019-11-06 23:35:26	2019-11-06	GENERAL PRACTICE	CLOXACILLIN	Injury, unspecified	Open wound of unspecified body region	Open wound of unspecified body region	Inappropriate	unnecessary	31	Barka PolyClinic
4.6	F	1.6	no		flu , cough ,, has recurrent lt ear discharge of pus ,, received oral abs	looks fair , afebrie chest |": nad throat : nad lt ear : full of pus	F	36	2019-11-07 23:20:37	2019-11-07	GENERAL PRACTICE	AUGMENTIN	Acute nasopharyngitis [common cold]	Acute Otitis Media	Otitis media, unspecified	Appropriate	Appropriate	38	Barka PolyClinic
7.4	M	4.4	no	cough cold		? General Examination:- =>General Condition :- Fair ; Throat :- Congested temp 37 ? Respiratory Examination:- =>Breath Sounds :- Vesicular;Rhonchi :- No;Crepitation :- No; hvb ? CVS Examination:- =>nad	F	36	2019-11-08 19:12:54	2019-11-08	GENERAL PRACTICE	CEPHALEXIN	Acute upper respiratory infection, unspecified		Acute pharyngitis, unspecified	Inappropriate	unnecessary	49	Barka PolyClinic
6.1	F	3.1	no	COUGH FEVER VOMITING		? General Examination:- =>General Condition :- Fair ; Throat :- Congested TEMP 37.6 ? Respiratory Examination:- =>CLEAR ? CVS Examination:- =>NAD	F	36	2019-11-09 12:25:53	2019-11-09	GENERAL PRACTICE	AMOXYCILLIN	Acute upper respiratory infection, unspecified		Acute pharyngitis, unspecified	Inappropriate	unnecessary	42	Barka PolyClinic
7	F	4	no	Fever, cough, cold.	A 4-Year baby girl, brought with history of fever, cough and cold.....1-day.	? General Examination:- =>Temp :- 38.4?C ; ; General Condition :- Looks Well ; Throat :- Tonsillitis ? Respiratory Examination:- =>Chest Shape :- Normal; Respiratory_distress :- No;Rhonchi :- No;Crepitation :- No; ? CVS Examination:- =>First Heart Sound:- Normal ; second Heart Sound:- Normal	M	41	2019-11-10 12:33:18	2019-11-10	GENERAL PRACTICE	AMOXYCILLIN	Acute nasopharyngitis [common cold]		Acute pharyngitis, unspecified	Inappropriate	unnecessary	51	Barka PolyClinic
13.8	F	10.8	no	cough flu fever sore throat		? General Examination:- =>General Condition :- Fair ; Throat :- Congested ? Respiratory Examination:- =>Breath Sounds :- Vesicular;Rhonchi :- No;Crepitation :- No; ? CVS Examination:- =>nad	F	36	2019-11-11 17:21:22	2019-11-11	GENERAL PRACTICE	AMOXYCILLIN	Acute upper respiratory infection, unspecified		Acute pharyngitis, unspecified	Inappropriate	unnecessary	43	Barka PolyClinic
29.1	F	26.1	no	common cold , fever , cough / 2 days		? General Examination:- =>Temp :- 38.1?C ; ; General Condition :- Fair ; Jaundice :- No ; Pallor :- No ; Throat :- Congested ? Respiratory Examination:- =>clear , no added sounds	F	41	2019-11-12 18:09:53	2019-11-12	GENERAL PRACTICE	CEPHALEXIN	Acute pharyngitis, unspecified		Acute pharyngitis, unspecified	Inappropriate	unnecessary	47	Barka PolyClinic
7.1	F	4.1	no	sore throat with flu and fever since three days		? General Examination:- =>Temp :- 37?C ; ; General Condition :- Looks Well ; Jaundice :- No ; Pallor :- No ; Throat :- Tonsillitis ? Respiratory Examination:- =>clear	F	48	2019-11-13 19:54:22	2019-11-13	GENERAL PRACTICE	AUGMENTIN	Acute tonsillitis, unspecified		Acute tonsillitis, unspecified	Inappropriate	unnecessary	42	Barka PolyClinic
5	F	2	no	acute tonsillitis	fever .. sore throat and c.cold since two days .. no vmiting .. no resp .. distress	? General Examination:- =>Temp :- 37.8?C ; ; Pallor :- No ; Throat :- Tonsillitis ? Respiratory Examination:- =>clear	M	46	2019-11-14 16:18:42	2019-11-14	GENERAL PRACTICE	CEPHALEXIN	Acute tonsillitis, unspecified		Acute tonsillitis, unspecified	Inappropriate	unnecessary	38	Barka PolyClinic
27.3	M	24.3	no	sore throat .. fever and c.cold 1 day ago		? General Examination:- =>BP :- 124/68 mmHg ; Temp :- 39.2?C ; ; Pallor :- No ; Cyanosis :- No ; Dehydration :- No ; Throat :- Congested ? Respiratory Examination:- =>clear ? CVS Examination:- =>nad	M	47	2019-11-15 06:06:50	2019-11-15	GENERAL PRACTICE	CEPHALEXIN	Acute pharyngitis, unspecified		Acute pharyngitis, unspecified	Inappropriate	unnecessary	30	Barka PolyClinic
7	F	4	no	fever	pt came complain of fever ass. with comon cold and cough for 2days	? General Examination:- =>Temp :- 37.8?C ; ; General Condition :- Fair ; Jaundice :- No ; Pallor :- No ; Throat :- Congested ? Respiratory Examination:- =>Breath Sounds :- Vesicular;Rhonchi :- No;Crepitation :- No;	M	35	2019-11-16 04:47:53	2019-11-16	GENERAL PRACTICE	AMOXYCILLIN	Acute pharyngitis, unspecified		Acute pharyngitis, unspecified	Inappropriate	unnecessary	19	Barka PolyClinic
36	M	33	no	ari	cough,running nose since yesterday no neck rigidity no vomiting no dyspnoea no skin rashes bowel habit normal	? General Examination:- =>Temp :- 37.6?C ; ; General Condition :- Fair ; Jaundice :- No ; Pallor :- No ; Clubbing :- No ; Cyanosis :- No ; Edema Feet :- No ; Dehydration :- No	M	46	2019-11-17 11:08:03	2019-11-17	GENERAL PRACTICE	CEPHALEXIN	Acute pharyngitis, unspecified		Acute pharyngitis, unspecified	Inappropriate	unnecessary	38	Barka PolyClinic
45.5	F	42.5	no	c/o fever s and sinusitis and all body ache		? General Examination:- =>General Condition :- Poor	F	53	2019-11-18 11:36:31	2019-11-18	GENERAL PRACTICE	AMOXYCILLIN	Acute sinusitis, unspecified		Acute sinusitis	Appropriate	Appropriate	29	Barka PolyClinic
6.3	F	3.3	no	fever	fever and sorethroat for 2 days	? General Examination:- =>Appearance :- rhinorrhea ; Temp :- 37.4?C ; ; Weight :- 10.7Kg ; ; General Condition :- Fair ; Lymphadenopathy :- Yes ; Throat :- Congested ? Respiratory Examination:- =>Respiratory_distress :- No;Breath Sounds :- Bronchial;	M	47	2019-11-19 14:41:46	2019-11-19	GENERAL PRACTICE	AMOXYCILLIN	Acute upper respiratory infection, unspecified		Acute pharyngitis, unspecified	Inappropriate	unnecessary	22	Barka PolyClinic
17.7	M	14.7	no	ari	cough,running nose since yesterday no neck rigidity no vomiting no dyspnoea no skin rashes bowel habit normal	? General Examination:- =>Temp :- 37.9?C ; ; General Condition :- Fair ; Jaundice :- No ; Pallor :- No ; Clubbing :- No ; Cyanosis :- No ; Edema Feet :- No ; Dehydration :- No	M	46	2019-11-20 23:21:54	2019-11-20	GENERAL PRACTICE	CEPHALEXIN	Acute tonsillitis, unspecified		Acute tonsillitis, unspecified	Inappropriate	unnecessary	42	Barka PolyClinic
30	F	27	no	rt side neck soft swelling 1 day ago .. no fever..		? General Examination:- =>Temp :- 36.6?C ; ; General Condition :- Fair ; Cyanosis :- No ; Lymphadenopathy :- No ; Throat :- Congested	M	47	2019-11-22 10:45:38	2019-11-22	GENERAL PRACTICE	METRONIDAZOLE	Acute lymphadenitis of face, head and neck	Acute pharyngitis, unspecified	Acute pharyngitis, unspecified	Inappropriate	unnecessary	47	Barka PolyClinic
5.9	M	2.9	no	acute tonsillitis	fever /sore throat /c.cold since two days . no vomiting. no resp . distress	? General Examination:- =>Temp :- 38.3?C ; ; Pallor :- No ; Throat :- Tonsillitis ? Respiratory Examination:- =>clear	M	46	2019-11-23 19:36:07	2019-11-23	GENERAL PRACTICE	AMOXYCILLIN	Acute tonsillitis, unspecified		Acute tonsillitis, unspecified	Inappropriate	unnecessary	35	Barka PolyClinic
35	F	32	no	c/o cough since 2 month nearly with somtaimes colour sputum...no fever no loss of appatite no weight loss no h/o travel no h/o tb contact she inform she came before and take rx with no improve	the case disscuse with g.m dr on call dr rania and she seen result and x-ray and she advice by monyax test and to fu result	? General Examination:- =>BP :- 102/73 mmHg ; Temp :- 36.3?C ; ; General Condition :- Fair ; Dehydration :- No ; Throat :- Congested ? Respiratory Examination:- =>Chest Shape :- Normal; Respiratory_distress :- No;Chest movement :- Normal;Rhonchi :- No;Crepitation :- No; ? CVS Examination:- =>First Heart Sound:- Normal ; second Heart Sound:- Normal	F	53	2019-11-25 11:11:27	2019-11-25	GENERAL PRACTICE	CEFUROXIME	Cough		Cough	Inappropriate	unnecessary	33	Barka PolyClinic
10.6	F	7.6	no	acute tonsillitis	fever /sore throat since two days .. h/o recurrent tonsillitis	? General Examination:- =>Temp :- 37?C ; ; Pallor :- No ; Throat :- Tonsillitis ? Respiratory Examination:- =>clear	M	46	2019-11-26 20:59:12	2019-11-26	GENERAL PRACTICE	ERYTHROMYCIN	Acute tonsillitis, unspecified		Acute tonsillitis, unspecified	Inappropriate	unnecessary	35	Barka PolyClinic
8	M	5	no	Rt.ear pain...today. Cong.++		? General Examination:- =>General Condition :- Looks Well ; Throat :- Congested	M	41	2019-11-27 21:57:18	2019-11-27	GENERAL PRACTICE	AMOXYCILLIN	Otitis media, unspecified	Otitis media, unspecified	Otitis media, unspecified	Inappropriate	unnecessary	32	Barka PolyClinic
8.7	F	5.7	no	acute tonsillitis	fever .. cough . sore throat since night . no vomiting	? General Examination:- =>Pallor :- No ; Throat :- Tonsillitis ? Respiratory Examination:- =>clear	M	46	2019-11-29 06:06:20	2019-11-29	GENERAL PRACTICE	CEPHALEXIN	Acute tonsillitis, unspecified		Acute tonsillitis, unspecified	Inappropriate	unnecessary	56	Barka PolyClinic
7.2	F	4.2	no	hx of fever .cough , c.cold since 3 day no vomitting , noraml bolw hbaite		? General Examination:- =>General Condition :- Fair ; Pallor :- No ; Cyanosis :- No ; Dehydration :- No ; Throat :- Congested temp36.7 ? Respiratory Examination:- =>clear ? CVS Examination:- =>s1s2 ? CNS Examination:- =>intact	F	30	2019-11-30 12:12:55	2019-11-30	GENERAL PRACTICE	AMOXYCILLIN	Acute upper respiratory infection, unspecified		Acute pharyngitis, unspecified	Inappropriate	unnecessary	37	Barka PolyClinic
5.7	M	2.7	no	cold and cough w/ fever for 2 days		? General Examination:- =>Temp :- 37?C ; ; Weight :- 13Kg ; ; General Condition :- Fair ; Jaundice :- No ; Pallor :- No ; Throat :- Congested ? Respiratory Examination:- =>clear	M	33	2019-12-01 17:59:04	2019-12-01	GENERAL PRACTICE	AMOXYCILLIN	Acute bronchitis, unspecified		Acute bronchitis, unspecified	Inappropriate	unnecessary	40	Barka PolyClinic
5.4	M	2.4	neg		fevr , flu , malaise started today	unwell , febrile t 40 chest : harsh breathing throat : inflammed	M	33	2019-12-03 00:19:39	2019-12-03	GENERAL PRACTICE	CEPHALEXIN	Acute nasopharyngitis [common cold]		Acute pharyngitis, unspecified	Inappropriate	unnecessary	29	Barka PolyClinic
6.1	M	3.1	no	hx of cough ,c.cold , fever since 1 week no vomitting , noraml bolw hbaite adole given 2 hr ago		? General Examination:- =>Temp :- 38?C ; ; General Condition :- Fair ; Pallor :- No ; Cyanosis :- No ; Dehydration :- No ; Throat :- Congested ? Respiratory Examination:- =>transmitted nasal sound ? CVS Examination:- =>s1s2 ? CNS Examination:- =>intact	F	30	2019-12-04 17:55:30	2019-12-04	GENERAL PRACTICE	AMOXYCILLIN	Acute upper respiratory infection, unspecified		Acute pharyngitis, unspecified	Inappropriate	unnecessary	63	Barka PolyClinic
9.5	M	6.5	no	pain and abrasion at rt knee after fall since evening today no swelling or limitation in movement also h/o cough and cold since few days		? General Examination:- =>Temp :- 36.5?C ; ; General Condition :- Fair ; Jaundice :- No ; Pallor :- No ; Throat :- Congested ? Respiratory Examination:- =>clear	M	52	2019-12-05 22:09:08	2019-12-05	GENERAL PRACTICE	CLOXACILLIN	Injury, unspecified		Open wound of unspecified body region	Inappropriate	unnecessary	35	Barka PolyClinic
6.4	M	3.4	no	sore throat with fever 2 days ago .. he came 2 days ago		? General Examination:- =>Temp :- 39?C ; ; Weight :- 11.8Kg ; ; Pallor :- No ; Cyanosis :- No ; Throat :- Congested ? Respiratory Examination:- =>clear ? CVS Examination:- =>nad	M	47	2019-12-06 23:28:25	2019-12-06	GENERAL PRACTICE	CEPHALEXIN	Acute pharyngitis, unspecified		Acute pharyngitis, unspecified	Inappropriate	unnecessary	39	Barka PolyClinic
17.4	M	14.4	high wbc and neutrophil	complains of rt side upper abdominal pain, w/ fever and vomitting for 1 week		? General Examination:- =>BP :- 130/70 mmHg ; Temp :- 37.8?C ; ; General Condition :- Looks Well ; Jaundice :- No ? Respiratory Examination:- =>clear ? Abdomen Examination:- =>rt hypochondriac tenderness	M	33	2019-12-07 21:04:03	2019-12-07	GENERAL PRACTICE	AMOXYCILLIN	Pain localized to upper abdomen	Sepsis	Sepsis	Appropriate	Appropriate	46	Barka PolyClinic
27.4	M	24.4	no	URTI. FU. HE SAYS THAT HE IS STILL SUFFERING FROM COUGH+PURULENT SPUTUM. NON-SMOKER. NO HX OF BA. HX OF CHRONIC ALLERGIC RHINITIS+		? General Examination:- =>Temp :- 37.1?C ; ; Throat :- Congested ? Respiratory Examination:- =>HVB, NO ADDED SOUNDS.	M	49	2019-12-09 12:07:53	2019-12-09	GENERAL PRACTICE	CEPHALEXIN	Acute upper respiratory infection, unspecified		Acute pharyngitis, unspecified	Appropriate	Appropriate	36	Barka PolyClinic
42.6	F	39.6	no	c/o tonsillitis fever common cold		? General Examination:- =>BP :- 130/89 mmHg ; Temp :- 36.5?C ; ; General Condition :- Fair ; Dehydration :- No ; Throat :- Tonsillitis ? Respiratory Examination:- =>clear ? CVS Examination:- =>First Heart Sound:- Normal ; second Heart Sound:- Normal	F	53	2019-12-10 12:08:09	2019-12-10	GENERAL PRACTICE	CEPHALEXIN	Acute tonsillitis, unspecified		Acute tonsillitis, unspecified	Inappropriate	unnecessary	23	Barka PolyClinic
36.6	F	33.6	no	no PMH not married hx of cough , c.cold , sor thort since 1 month no fever no hx contact with TB no hx of recenly treaveal no night sweat , no loss of whight hx of asthma in the family		? General Examination:- =>General Condition :- Fair ; Pallor :- No ; Cyanosis :- No ; Dehydration :- No ; Throat :- Clear ? Respiratory Examination:- =>clear b/l air entry ? CVS Examination:- =>s1s2 ? CNS Examination:- =>intact	F	30	2019-12-11 22:08:58	2019-12-11	GENERAL PRACTICE	CEPHALEXIN	Cough		Cough	Inappropriate	unnecessary	50	Barka PolyClinic
7.4	M	4.4	no	cough and c.cold and fever 4 days ago .. he came befor 4 days		? General Examination:- =>Temp :- 36.6?C ; ; Weight :- 23Kg ; ; Pallor :- No ; Cyanosis :- No ; Dehydration :- No ; Throat :- Congested ? Respiratory Examination:- =>harsh vesicular beath sounds ? CVS Examination:- =>nad	M	47	2019-12-13 08:23:43	2019-12-13	GENERAL PRACTICE	CEPHALEXIN	Acute upper respiratory infection, unspecified		Acute pharyngitis, unspecified	Inappropriate	unnecessary	41	Barka PolyClinic
20.5	M	17.5	no	tooth decay and cavity		? General Examination:- =>General Condition :- Looks Well	M	33	2019-12-14 00:52:02	2019-12-14	GENERAL PRACTICE	CEPHALEXIN	Pulpitis		Pulpitis	Inappropriate	unnecessary	29	Barka PolyClinic
23.2	M	20.2	no	epigastric pain .. nausea ..mild diarrhoea 1 day ago	ecg.. sr .. rate at 82 b/m ..no st -t waves changes	? General Examination:- =>BP :- 138/82 mmHg ; Pallor :- No ; Cyanosis :- No ; Dehydration :- No ? Respiratory Examination:- =>clear ? Abdomen Examination:- =>soft	M	47	2019-12-15 09:11:13	2019-12-15	GENERAL PRACTICE	METRONIDAZOLE	Gastritis, unspecified		Gastroenteritis of presumed infectious origin	Inappropriate	unnecessary	35	Barka PolyClinic
29.8	F	26.8	no	c/o common cold fever sore throat also c/o itching externeal gentiliea		? General Examination:- =>Temp :- 36.7?C ; ; General Condition :- Fair ; Throat :- Congested ? Respiratory Examination:- =>clear ? CVS Examination:- =>First Heart Sound:- Normal ; second Heart Sound:- Normal	F	53	2019-12-16 12:15:34	2019-12-16	GENERAL PRACTICE	CEPHALEXIN	Acute upper respiratory infection, unspecified	Acute pharyngitis	Acute pharyngitis, unspecified	Inappropriate	unnecessary	34	Barka PolyClinic
17.4	M	14.4	no	common cold ..three to four days only taken symptomatic treatment no improvement		? General Examination:- =>Temp :- 36.6?C ; ; SPO2 :- 100 ; General Condition :- Looks Well ; Jaundice :- No ; Pallor :- No ; Throat :- Congested ? Respiratory Examination:- =>clear	F	48	2019-12-17 10:38:11	2019-12-17	GENERAL PRACTICE	CEPHALEXIN	Acute nasopharyngitis [common cold]		Acute pharyngitis, unspecified	Inappropriate	unnecessary	30	Barka PolyClinic
23.6	M	20.6	no	skin lesions on body yesterday .. fever since yerterday patient seen in july with same lesions and suspected chicken pox.now he is saying same lesions as before	on exam vesicular lesions on body	? General Examination:- =>Temp :- 36.7?C ; ; General Condition :- Looks Well ; Jaundice :- No ; Pallor :- No ; Clubbing :- No ; Cyanosis :- No ; Edema Feet :- No ; Dehydration :- No ; Throat :- Clear ? Respiratory Examination:- =>clear	F	48	2019-12-18 16:28:27	2019-12-18	GENERAL PRACTICE	CEPHALEXIN	Dermatitis, unspecified		Dermatitis	Inappropriate	unnecessary	35	Barka PolyClinic
5	M	2	no	FEVER, COUGH AND COLD FOR 3 DAYS.		? General Examination:- =>Temp :- 38.1?C ; ; SPO2 :- 97 ; Throat :- Clear ? Respiratory Examination:- =>NAD	M	49	2019-12-19 20:25:56	2019-12-19	GENERAL PRACTICE	AMOXYCILLIN	Acute nasopharyngitis [common cold]		Acute pharyngitis, unspecified	Inappropriate	unnecessary	45	Barka PolyClinic
6.4	M	3.4	no	child w/cold, cough w/ fever for 2 days already seen in Sawadi Hc and given tx, but no antibiotics no other complaints		? General Examination:- =>Temp :- 37?C ; ; General Condition :- Looks Well ; Jaundice :- No ; Pallor :- No ; Throat :- Congested ? Respiratory Examination:- =>b/ wheeze	M	33	2019-12-20 19:51:53	2019-12-20	GENERAL PRACTICE	CEPHALEXIN	Cough		Cough	Inappropriate	unnecessary	43	Barka PolyClinic
11.4	M	8.4	no	fever ,cold and headache	c/o fever ,cold since yesterday abd headache since last 1 wk no h/o vomiting ,dizziness or blurred vision k/c asthama no h/o sickling or g6pd defficiency	? General Examination:- =>Temp :- 36.5?C ; ; General Condition :- Fair ; Jaundice :- No ; Pallor :- No ; Throat :- Congested ? Respiratory Examination:- =>clear ? Abdomen Examination:- =>soft,nontender ? CVS Examination:- =>nad	M	52	2019-12-21 11:44:29	2019-12-21	GENERAL PRACTICE	AMOXYCILLIN	Acute upper respiratory infection, unspecified		Acute pharyngitis, unspecified	Inappropriate	unnecessary	38	Barka PolyClinic
29.9	M	26.9	high wbc and neutrophil	throat pain and fever for 1 day		? General Examination:- =>Temp :- 38?C ; ; General Condition :- Looks Well ; Jaundice :- No ; Throat :- Congested ? Respiratory Examination:- =>clear	M	33	2019-12-22 16:15:23	2019-12-22	GENERAL PRACTICE	CEPHALEXIN	Acute upper respiratory infection, unspecified	Sepsis	Sepsis	Appropriate	Appropriate	51	Barka PolyClinic
4.7	F	1.7	no	fever cough cold		? General Examination:- =>Temp :- 36?C ; ; General Condition :- Fair ; Throat :- Tonsillitis ? Respiratory Examination:- =>hvb ? CVS Examination:- =>nad	F	36	2019-12-23 18:28:51	2019-12-23	GENERAL PRACTICE	AMOXYCILLIN	Acute tonsillitis, unspecified		Acute tonsillitis, unspecified	Inappropriate	unnecessary	49	Barka PolyClinic
48.6	F	45.6	no	cough and cold w/ fever for 2 days		? General Examination:- =>General Condition :- Looks Well ; Jaundice :- No ; Throat :- Congested ? Respiratory Examination:- =>clear	M	33	2019-12-24 17:47:55	2019-12-24	GENERAL PRACTICE	CEPHALEXIN	Acute upper respiratory infection, unspecified		Acute pharyngitis, unspecified	Inappropriate	unnecessary	40	Barka PolyClinic
21.7	F	18.7	no	pt w/ anal pain, having hemorrhoids w/ bleeding? not active on/off difficulty defecation		? General Examination:- =>BP :- 110/78 mmHg ; General Condition :- Looks Well	M	33	2019-12-25 14:36:30	2019-12-25	GENERAL PRACTICE	CEPHALEXIN	Unspecified haemorrhoids without complication		Unspecified haemorrhoids without complication	Inappropriate	unnecessary	38	Barka PolyClinic
10	F	7	no	SCD f/u in SQUH hx of rt ear pain and discharge since 2 day no pain , no fever pt the mother asking from cbc		? General Examination:- =>General Condition :- Fair ; Jaundice :- Yes ; Pallor :- Yes ; Cyanosis :- No ; Dehydration :- No rt ear infalmmed dischrage,, tm not seen ? CNS Examination:- =>intact	F	30	2019-12-26 16:55:50	2019-12-26	GENERAL PRACTICE	AMOXYCILLIN	Otitis externa, unspecified		Otitis externa, unspecified	Inappropriate	unnecessary	40	Barka PolyClinic
4	F	1	no	cough flu fever		? General Examination:- =>General Condition :- Fair ; Throat :- Congested ? Respiratory Examination:- =>Breath Sounds :- Vesicular;Rhonchi :- No;Crepitation :- No; hvb ? CVS Examination:- =>nad	F	36	2019-12-27 19:23:30	2019-12-27	GENERAL PRACTICE	AMOXYCILLIN	Acute upper respiratory infection, unspecified		Acute pharyngitis, unspecified	Inappropriate	unnecessary	33	Barka PolyClinic
8	M	5	no	cough and c.cold and fever 3 days ago		? General Examination:- =>Temp :- 38.4?C ; ; Weight :- 21Kg ; ; Pallor :- No ; Cyanosis :- No ; Dehydration :- No ; Throat :- Tonsillitis ? Respiratory Examination:- =>clear ? CVS Examination:- =>nad	M	47	2019-12-27 07:50:41	2019-12-27	GENERAL PRACTICE	ERYTHROMYCIN	Acute tonsillitis, unspecified		Acute tonsillitis, unspecified	Inappropriate	unnecessary	44	Barka PolyClinic
4.3	M	1.3	no	allergy	ly eye cheek swelling and lesion below the lt eye since yesterday .. assocaited with fever . no cough no vomiting .no resp . Distress	? General Examination:- =>Temp :- 37.7?C ; ; Pallor :- No ; Cyanosis :- No ; Dehydration :- No ; Throat :- Clear ? Respiratory Examination:- =>clear	M	46	2019-12-28 10:55:33	2019-12-28	GENERAL PRACTICE	AMOXYCILLIN	Allergy, unspecified		Allergy, unspecified	Inappropriate	unnecessary	48	Barka PolyClinic
6.9	M	3.9	no	fever, cough and cold for 3 days. given syp adol 4 hours ago. no hx of travelling outside. sick contact+ pmh is not significant.		? General Examination:- =>Temp :- 38.6?C ; ; Weight :- 12.85Kg ; ; General Condition :- Fair ; Throat :- Clear ? Respiratory Examination:- =>nad	M	49	2019-12-29 03:40:45	2019-12-29	GENERAL PRACTICE	AMOXYCILLIN	Fever, unspecified	Acute Pharyngitis	Acute pharyngitis, unspecified	Inappropriate	unnecessary	26	Barka PolyClinic
5.8	M	2.8	no	fever since few hours also have sore throat no cough , no vomiting		? General Examination:- =>Temp :- 38.1?C ; ; General Condition :- Fair ; Jaundice :- No ; Pallor :- No ; Throat :- Tonsillitis ? Respiratory Examination:- =>clear	F	38	2019-12-30 02:55:02	2019-12-30	GENERAL PRACTICE	AMOXYCILLIN	Acute tonsillitis, unspecified		Acute tonsillitis, unspecified	Inappropriate	unnecessary	19	Barka PolyClinic
44.5	F	41.5	EH E coli	anc c/o weatery diarrhoea and abd. colaic no blood at stool no vomting		? General Examination:- =>BP :- 122/80 mmHg ; Temp :- 36?C ; ; General Condition :- Fair ? Abdomen Examination:- =>soft	F	53	2019-12-31 08:45:24	2019-12-31	GENERAL PRACTICE	METRONIDAZOLE	Diarrhoea and gastroenteritis of presumed infectious origin		Gastroenteritis of presumed infectious origin	Appropriate	Appropriate	22	Barka PolyClinic
58.8	F	55.8	no	fever,,runny nose ans cough since 2 days with bodyaches no vomitting		? General Examination:- =>Temp :- 37.5?C ; ; General Condition :- Looks Well ; Throat :- Congested ? Respiratory Examination:- =>Chest Shape :- Normal; Rhonchi :- No;Crepitation :- No; ? Abdomen Examination:- =>lax ? CVS Examination:- =>nad	F	40	2019-01-01 10:39:18	2019-01-01	GENERAL PRACTICE	AMOXYCILLIN	Acute bronchitis, unspecified		Acute bronchitis, unspecified	Inappropriate	unnecessary	38	Rustaq Polyclinic
4.8	M	1.8	no			EPI No.: 95.12.17 IMCI Examination: Diarrhoea:- No Cough:- Auscultatory Findings: Throat Problems:- No Fever :- No Ear Problems:- No Additional complaints & Examination: pt c/oof running nose and cough since 2 days with fever postassive vomting once lt eye dischrge toady with no truma no f,b noaml bowel ahbit no urein c/o noski rash feedingwell childis active and playing by ex lt eye there si red…	F	31	2019-01-03 15:18:44	2019-01-03	GENERAL PRACTICE	AMOXYCILLIN	Acute nasopharyngitis [common cold]		Acute pharyngitis, unspecified	Inappropriate	unnecessary	32	Rustaq Polyclinic
5.2	F	2.2	no			EPI No.: 59.8.17 IMCI Examination: Diarrhoea:- No Cough:- Auscultatory Findings:clear Cough Classification:- Coryza(runing nose) Throat Problems :- Normal:tonsillitis Routine Checkup:tonsillitis Throat Classification:- Suspected Non-streptococcal sore throat Fever :- No Ear Problems:- No Additional complaints & Examination: pt c/oof running ose and cough since 2 dyas iwth fever on and off no vomt…	F	31	2019-01-04 11:12:55	2019-01-04	GENERAL PRACTICE	AMOXYCILLIN	Acute tonsillitis, unspecified		Acute tonsillitis, unspecified	Inappropriate	unnecessary	25	Rustaq Polyclinic
16.7	M	13.7	no	pt come with pain rt big toe with h/oof truam today while palying no other c/o		? General Examination:- =>Temp :- 37?C ; ; Weight :- 41Kg ; ; General Condition :- Looks Well ; Jaundice :- No ; Pallor :- No ? Respiratory Examination:- =>clear ? Abdomen Examination:- =>soft ? CVS Examination:- =>s1s2n ? CNS Examination:- =>orinted no neck rigidty	F	31	2019-01-05 15:43:58	2019-01-05	GENERAL PRACTICE	AUGMENTIN	Pain, unspecified		Pain, unspecified	Inappropriate	unnecessary	29	Rustaq Polyclinic
8	F	5	no	runny nose and cough since 3 days with fever no vomitting her sisters have the same complain also stated to have skin infection over both lower limbs		? General Examination:- =>Temp :- 37?C ; ; General Condition :- Looks Well ; Throat :- Clear ? Respiratory Examination:- =>Chest Shape :- Normal; Rhonchi :- No;Crepitation :- No; ? Abdomen Examination:- =>lax ? CVS Examination:- =>nad ? CNS Examination:- =>neck lax,no signs of meningeal irritation	F	40	2019-01-05 19:50:36	2019-01-05	GENERAL PRACTICE	CLOXACILLIN	Impetigo [any organism] [any site]		Cutaneous abscess, furuncle and carbuncle, unspecified	Appropriate	Appropriate	44	Rustaq Polyclinic
7.4	M	4.4	high crp			Presenting Complaints :- fever 2 days no cough no colds no dysuria decrease appitite no throat pain all investigation done crp 84 dr mathaew advice for addmession but his father refused IMCI Examination: Diarrhoea:- No Cough:- No Throat Problems:- No Fever :- No Fever Classification:- Fever cause not known Ear Problems:- No Additional complaints & Examination: nil Advice :- f/u in paediatric opd	F	33	2019-01-08 15:57:39	2019-01-08	GENERAL PRACTICE	AUGMENTIN	Fever, unspecified	Sepsis	Sepsis	Appropriate	Appropriate	25	Rustaq Polyclinic
8.7	F	5.7	no	fever	fever throat pain cough since 3 days	? General Examination:- =>Temp :- 37.3?C ; ; Weight :- 16.3Kg ; ; General Condition :- Fair ; Throat :- Tonsillitis ? Respiratory Examination:- =>Chest Shape :- Normal; Respiratory_distress :- No;Chest movement :- Normal;	F	57	2019-01-11 13:08:39	2019-01-11	GENERAL PRACTICE	AUGMENTIN	Acute tonsillitis, unspecified		Acute tonsillitis, unspecified	Inappropriate	unnecessary	23	Rustaq Polyclinic
28.6	F	25.6	wbc in urine	burning urination , with blood at end of urination vaginal d/c , watery , yellowish , with burning and itching lmp ?25/12			F	33	2019-01-14 15:47:22	2019-01-14	GENERAL PRACTICE	AMOXYCILLIN	Urinary tract infection, site not specified		Urinary Tract Infection	Appropriate	Appropriate	36	Rustaq Polyclinic
4.8	M	1.8	no			EPI No.: 102/12/17 IMCI Examination: Diarrhoea:- No Cough:- Chest in-drawing:no RR in one minute:42 Auscultatory Findings:no added sounds Cough Classification:- Coryza(runing nose) Throat Problems :- Enlarged but Normal: Bronchiolitis: Throat Classification:- Suspected Non-streptococcal sore throat Fever:- Dysuria / Frequency:no Maculopapular Rash:no Neck stiffness:no Fever Classification:- Dysur…	F	57	2019-01-17 14:15:36	2019-01-17	GENERAL PRACTICE	AMOXYCILLIN	Acute nasopharyngitis [common cold]		Acute pharyngitis, unspecified	Inappropriate	unnecessary	27	Rustaq Polyclinic
36	F	33	no	lmp yesterday c/o fever and sore throat since yesterday no loc no rash no vomiting not htn or dm		? General Examination:- =>Temp :- 37.3?C ; ; General Condition :- Looks Well ; Cyanosis :- No ; Dehydration :- No ; Throat :- follicular Tonsillitis ? Respiratory Examination:- =>clear ? Abdomen Examination:- =>lax ? CNS Examination:- =>intact	F	38	2019-01-19 14:16:08	2019-01-19	GENERAL PRACTICE	AMOXYCILLIN	Acute tonsillitis, unspecified	Acute follicular tonsillitis	Acute tonsillitis, unspecified	Appropriate	Appropriate	31	Rustaq Polyclinic
54.1	F	51.1	no	coomon cold and cough since 5 days wiht rhinitis .also has fever.no vomitting .no past h/o		? General Examination:- =>Temp :- 37?C ; ; General Condition :- Looks Well ; Throat :- Congested ? Respiratory Examination:- =>nad ? CVS Examination:- =>nad	F	57	2019-01-22 12:23:21	2019-01-22	GENERAL PRACTICE	CEFUROXIME	Acute bronchitis, unspecified	Acute nasopharyngitis [common cold]	Acute pharyngitis, unspecified	Inappropriate	unnecessary	37	Rustaq Polyclinic
6.4	M	3.4	no	pain rt ear since 3 days with common cold.no fever.no vomitting .no rash.		? General Examination:- =>Temp :- 37?C ; ; General Condition :- Looks Well ; Throat :- Congested ? Respiratory Examination:- =>nad ? CVS Examination:- =>nad	F	57	2019-01-25 14:31:27	2019-01-25	GENERAL PRACTICE	AMOXYCILLIN	Otalgia	Acute nasopharyngitis [common cold]	Acute pharyngitis, unspecified	Inappropriate	unnecessary	26	Rustaq Polyclinic
67.6	F	64.6	no		burn rt knee 5 days by hot oil,k/o dm	local burn and swelling	F	45	2019-01-28 10:43:18	2019-01-28	GENERAL PRACTICE	CLOXACILLIN	Medical care, unspecified	Burns involving less than 10% of body surface	Burns involving less than 10% of body surface	Inappropriate	unnecessary	45	Rustaq Polyclinic
21.7	F	18.7	no	for medication	came from brimi forget her medication	? General Examination:- =>General Condition :- Fair ; Throat :- Congested ? Respiratory Examination:- =>Chest Shape :- Normal; Respiratory_distress :- No;Chest movement :- Normal;	F	57	2019-01-31 21:38:47	2019-01-31	GENERAL PRACTICE	METRONIDAZOLE	Medical care, unspecified	Acute pharyngitis	Acute pharyngitis, unspecified	Inappropriate	unnecessary	37	Rustaq Polyclinic
7.3	M	4.3	no			Presenting Complaints :- fever high grade 3 days and cough colds IMCI Examination: Diarrhoea:- No Cough:- No Cough Classification:- Coryza(runing nose) Throat Problems:- No Fever :- No Fever Classification:- Fever cause known Ear Problems:- No Additional complaints & Examination: nil	F	33	2019-02-02 17:51:22	2019-02-02	GENERAL PRACTICE	AMOXYCILLIN	Fever, unspecified	Acute nasopharyngitis [common cold]	Acute pharyngitis, unspecified	Inappropriate	unnecessary	40	Rustaq Polyclinic
6.9	F	3.9	no			Tonsillitis ============ Fever With Pain Throat Since 2days No Vomiting Normal Bowel NO SOB No Fits No LOC No Bodyrash No Travelling ============== ? General Examination:-No Meningeal Signs =>Temp :- 39?C ;WT 18.1KG ; General Condition :- Looks Well ; Jaundice :- No ; Pallor :- No ; Throat :- Tonsillitis with Exudates ? Respiratory Examination:- =>Clear ? Abdomen Examination:- =>Soft ? CVS Examin…	F	37	2019-02-05 20:01:14	2019-02-05	GENERAL PRACTICE	AUGMENTIN	Acute tonsillitis, unspecified	Acute follicular tonsillitis	Acute tonsillitis, unspecified	Appropriate	Appropriate	29	Rustaq Polyclinic
33.8	F	30.8	high crp	fever since yesterday no ari no loc no rash no vomiting no urinary or bowel c/o no chest pain or sob no h/o travel lmp 1 week back..not htn or dm		? General Examination:- =>BP :- 80/40 mmHg ; General Condition :- Looks Well ; Cyanosis :- No ; Dehydration :- No ; Throat :- Congested ? Respiratory Examination:- =>clear ? Abdomen Examination:- =>lax ? CVS Examination:- =>s1,2n ? CNS Examination:- =>no sign of meningeal irritation	F	38	2019-02-09 16:18:49	2019-02-09	GENERAL PRACTICE	CEFUROXIME	Fever, unspecified	Sepsis	Sepsis	Appropriate	Appropriate	31	Rustaq Polyclinic
6.1	M	3.1	no			Presenting Complaints :- nasal bleeding recurrent since long time no hx of trauma no hx of blood disease IMCI Examination: Diarrhoea:- No Cough:- No Throat Problems:- No Fever :- No Ear Problems:- No Additional complaints & Examination: nil	F	33	2019-02-12 18:54:38	2019-02-12	GENERAL PRACTICE	AUGMENTIN	Epistaxis		Epistaxis	Inappropriate	unnecessary	32	Rustaq Polyclinic
40.8	F	37.8	no		G3P2+0 , 39+6 Weeks pregnancy(tomorrow will Complete 40 Weeks) Today Presented with C/O Mild Abd Cramps Ass Diarrhoea Since yesterday night 4-5 times Per day No Fever No Vomiting NO Vag Discharge Stool Nonmucoid Nonbloody No H/O Eating Outside or Contact	? General Examination:- =>BP :- 90/60 mmHg ; Temp :- 36?C ; ; General Condition :- Looks Well ; Jaundice :- No ; Pallor :- No ? Respiratory Examination:- =>Clear ? Abdomen Examination:- =>Distended ? CVS Examination:- =>S1S2N	F	37	2019-02-15 21:38:47	2019-02-15	GENERAL PRACTICE	METRONIDAZOLE	Diarrhoea and gastroenteritis of presumed infectious origin		Gastroenteritis of presumed infectious origin	Inappropriate	unnecessary	27	Rustaq Polyclinic
34.5	M	31.5	no	not htn or dm c/o fever and c cold 5 days on azithromycin 500mg since yesterday no loc no rash no vomiting no urinary or bowel c/o		? General Examination:- =>BP :- 120/80 mmHg ; Temp :- 36.8?C ; ; General Condition :- Looks Well ; Cyanosis :- No ; Dehydration :- No ; Throat :- Congested ? Respiratory Examination:- =>clear ? CNS Examination:- =>intact	F	38	2019-02-19 09:13:37	2019-02-19	GENERAL PRACTICE	CEFUROXIME	Acute upper respiratory infection, unspecified	Recurrent oral aphthae	Recurrent oral aphthae	Inappropriate	unnecessary	33	Rustaq Polyclinic
9.1	M	6.1	no		cut wound lt index finger today	local cut wound with bleeding	F	45	2019-02-22 16:55:10	2019-02-22	GENERAL PRACTICE	AMOXYCILLIN	Medical care, unspecified	Open wound of unspecified body region	Open wound of unspecified body region	Inappropriate	unnecessary	35	Rustaq Polyclinic
45	F	42	wbc in urine	Renal Colic	G6P5 +0 14+ Weeks Pregnancy with GDM H.O Renal Stones (3 times Laser done ,Last 1yr back ,Was under Fu @ SQUH) C/O Abdominal Pain Since 3days ass Dysuria Today Pain Increased with Vomitings Twice No Fever No Vag Discharge No Vag Bleeding Normal Bowel no Cough No Chest Pain nO LOC NO Past Surgical History		F	37	2019-02-26 15:59:46	2019-02-26	GENERAL PRACTICE	CEFUROXIME	Unspecified renal colic		Urinary Tract Infection	Inappropriate	escalated use of extended-spectrum antibiotics	33	Rustaq Polyclinic
8.1	M	5.1	no	pt c/oof running nose and cough since 2 days with fever no vomting noraml bowela hbit no urien c/o no skin rash feedingwell childi s active		? General Examination:- =>Temp :- 37?C ; ; Weight :- 16.5Kg ; ; General Condition :- Looks Well ; Jaundice :- No ; Pallor :- No ; Clubbing :- No ; Cyanosis :- No ; Edema Feet :- No ; Dehydration :- No ; Peripheral Pulses :- Yes ; Throat :- Congested ? Respiratory Examination:- =>clear ? Abdomen Examination:- =>soft ? CVS Examination:- =>s1s2n ? CNS Examination:- =>orinted no neck ridgity	F	31	2019-03-01 19:57:38	2019-03-01	GENERAL PRACTICE	AMOXYCILLIN	Acute nasopharyngitis [common cold]		Acute pharyngitis, unspecified	Inappropriate	unnecessary	35	Rustaq Polyclinic
39.5	M	36.5	no	pt come for clips removal as advised from royal hospital afyer 5 days from dicharge he dischared at 26 /2/2018 pt did operation at 20/2/19 for post retroperitoneal lymph node dissection pthas appiontment on 13//3/19 no fever n o htn dm		? General Examination:- =>BP :- 110/70 mmHg ; Temp :- 37?C ; ; General Condition :- Looks Well ; Jaundice :- No ; Pallor :- No ? Respiratory Examination:- =>clear ? Abdomen Examination:- =>soft ? CVS Examination:- =>s1s2n ? CNS Examination:- =>orinted no neck rigidty	F	31	2019-03-04 10:23:48	2019-03-04	GENERAL PRACTICE	CLOXACILLIN	Attention to surgical dressings and sutures		Open wound of unspecified body region	Inappropriate	unnecessary	32	Rustaq Polyclinic
10.1	M	7.1	no		Fever with Pain Throat 2days No Travelling No Fits No LOC NO SOB No Bodyrash Normal Bowel		F	37	2019-03-07 20:18:51	2019-03-07	GENERAL PRACTICE	AUGMENTIN	Acute tonsillitis, unspecified		Acute tonsillitis, unspecified	Inappropriate	unnecessary	37	Rustaq Polyclinic
26.8	F	23.8	no	LEFT GROIN LESION , NO D/C NO FEVER		LOCAL: THERE IS 1 BOIL ON PREESING , DISCHARGE COME OUT	F	33	2019-03-10 13:08:45	2019-03-10	GENERAL PRACTICE	CLOXACILLIN	Disorder of skin and subcutaneous tissue, unspecified	Boil	Cutaneous abscess, furuncle and carbuncle, unspecified	Appropriate	Appropriate	41	Rustaq Polyclinic
44.7	M	41.7	no	common cold and sorethroat with fever since 2 days.no vomititng .no recent h/o travel.loose motions 2 to 3 times per day .no past h/o htn dm/hbv carrier		? General Examination:- =>BP :- 120/80 mmHg ; Temp :- 38?C ; ; General Condition :- Looks Well ; Jaundice :- No ; Pallor :- No ; Throat :- Congested ? Respiratory Examination:- =>nad ? Abdomen Examination:- =>soft ? CVS Examination:- =>nad	F	57	2019-03-13 11:32:32	2019-03-13	GENERAL PRACTICE	CEFUROXIME	Acute nasopharyngitis [common cold]	Acute pharyngitis, unspecified	Acute pharyngitis, unspecified	Inappropriate	unnecessary	26	Rustaq Polyclinic
5.8	M	2.8	no	fever,,runny nose and cough since yesterday no vomitting		? General Examination:- =>Temp :- 37?C ; ; Weight :- 9.3Kg ; ; General Condition :- Looks Well ; Throat :- Congested ? Respiratory Examination:- =>scattered whezes with creps over the rt lower lobe techypnoe,RR 50/min ? Abdomen Examination:- =>lax ? CVS Examination:- =>nad ? CNS Examination:- =>neck lax,no signs of meningeal irritation	F	40	2019-03-15 18:00:21	2019-03-15	GENERAL PRACTICE	CEPHALEXIN	Acute nasopharyngitis [common cold]	Acute bronchitis, unspecified	Acute bronchitis, unspecified	Inappropriate	unnecessary	32	Rustaq Polyclinic
8.4	M	5.4	no			IMCI Examination: Diarrhoea :- No Cough :- No Throat Problems:- No Fever :- No Ear Problems :- No Additional complaints & Examination: pt c/oof swelling in the gum since 3 to 4 days with no fever no vomting noral bowel ahbit no uren c/o noskn rash feedingwell Advice :- f/u iiwth dental	F	31	2019-03-16 19:37:38	2019-03-16	GENERAL PRACTICE	AMOXYCILLIN	Dental examination		Gingivitis	Inappropriate	unnecessary	36	Rustaq Polyclinic
4.6	M	1.6	no	h/o fever since 2 days with common cold and cough .no vomitting .no rash .no loose motions no rash		? General Examination:- =>Temp :- 37.6?C ; ; General Condition :- Looks Well ; Pallor :- No ; Dehydration :- No ; Throat :- Congested ? Respiratory Examination:- =>nad ? Abdomen Examination:- =>soft ? CVS Examination:- =>nad	F	57	2019-03-19 22:57:02	2019-03-19	GENERAL PRACTICE	AMOXYCILLIN	Acute nasopharyngitis [common cold]		Acute pharyngitis, unspecified	Inappropriate	unnecessary	35	Rustaq Polyclinic
5.5	F	2.5	no	c cold and fever 3 days no loc no rash no vomiting no urinary or bowel c/o feeding ok		? General Examination:- =>Temp :- 37?C ; ; Weight :- 10Kg ; ; General Condition :- Looks Well ; Cyanosis :- No ; Dehydration :- No ; Throat :- Congested ? Respiratory Examination:- =>clear ? Abdomen Examination:- =>lax ? CNS Examination:- =>no sign of meningeal irritation	F	38	2019-03-23 11:11:16	2019-03-23	GENERAL PRACTICE	AMOXYCILLIN	Acute upper respiratory infection, unspecified		Acute pharyngitis, unspecified	Inappropriate	unnecessary	35	Rustaq Polyclinic
11.1	M	8.1	no	fever and c cold 1 day no loc no rash no vomiting feeding ok		? General Examination:- =>Temp :- 37.7?C ; ; General Condition :- Looks Well ; Cyanosis :- No ; Dehydration :- No ; Throat :- Tonsillitis ? Respiratory Examination:- =>clear ? Abdomen Examination:- =>lax ? CNS Examination:- =>intact	F	38	2019-03-25 21:06:30	2019-03-25	GENERAL PRACTICE	AUGMENTIN	Acute tonsillitis, unspecified		Acute tonsillitis, unspecified	Inappropriate	unnecessary	29	Rustaq Polyclinic
37.3	M	34.3	no	hx of swelling at rt fingers ,,2 nd fingesrs,,redness,,no diaschrge,,aminly around the nail no hx of fever no hx of truma or fall		afebrile local ex:sweelling ,,,redneess around the nail of 2 n finger	F	29	2019-03-29 11:44:45	2019-03-29	GENERAL PRACTICE	CLOXACILLIN	Examination and observation for other specified reasons	Cellulitis, unspecified	Cellulitis, unspecified	Inappropriate	unnecessary	22	Rustaq Polyclinic
32.1	F	29.1	wbc in urine	lower abdominal pain since days no urinary symptom watery vaginal loss lmp 16/3			F	33	2019-04-01 10:37:53	2019-04-01	GENERAL PRACTICE	AMOXYCILLIN	Other and unspecified abdominal pain	Urinary Tract Infection	Urinary Tract Infection	Appropriate	Appropriate	42	Rustaq Polyclinic
14.2	M	11.2	no	COMMON COLD AND OTALGIA WITH FEVER ... NO OTHER ACTIVE COMPLAINT ......	NO PUS DISCHRGE NO LOOSE STOOLS NO VOMITING ...	? General Examination:- =>Temp :- 36.6?C ; ; General Condition :- Looks Well ; Jaundice :- No ; Pallor :- No ; Cyanosis :- No ; Dehydration :- No ; Throat :- Congested ? Respiratory Examination:- =>Respiratory_distress :- No;Rhonchi :- No;Crepitation :- No;	M	46	2019-04-03 18:47:47	2019-04-03	GENERAL PRACTICE	AMOXYCILLIN	Otalgia	Acute pharyngitis, unspecified	Acute pharyngitis, unspecified	Inappropriate	unnecessary	33	Rustaq Polyclinic
10.4	F	7.4	no			fever since 1 day with throat pain refuse oral intake no urinary complain normal bowel habit --------------------- t 39.2 throat: tonsilitis cervical lymphadenopathy chest: clear cvs :s1,s2, no murmur	F	33	2019-04-06 18:54:50	2019-04-06	GENERAL PRACTICE	AMOXYCILLIN	Acute tonsillitis, unspecified		Acute tonsillitis, unspecified	Appropriate	Appropriate	47	Rustaq Polyclinic
9	F	6	wbc in urine	lower abdominal pain since morning with burning urination today h/o UTI		looks well afebrile p/a: soft , no tenderness	F	33	2019-04-08 21:39:25	2019-04-08	GENERAL PRACTICE	AUGMENTIN	Dysuria	Urinary Tract Infection	Urinary Tract Infection	Appropriate	Appropriate	45	Rustaq Polyclinic
13	F	10	no	vomiting	vomiting fever	? General Examination:- =>Temp :- 37.8?C ; ; Weight :- 23.9Kg ; ; General Condition :- Fair ; Throat :- Tonsillitis ? Respiratory Examination:- =>Chest Shape :- Normal; Respiratory_distress :- No;Chest movement :- Normal;	F	57	2019-04-12 10:53:22	2019-04-12	GENERAL PRACTICE	AUGMENTIN	Nausea and vomiting	Acute tonsillitis, unspecified	Acute tonsillitis, unspecified	Inappropriate	unnecessary	25	Rustaq Polyclinic
34.4	M	31.4	wbc in urine	THERE IS H/O RECURRENT UTI WITH DISCHARGE AND DYSURIA INB THE LAST VISIT AFTER ABS BECAME BETTER , BUT AGAIN BECAME SUFFERED DUE TO SAME COMPLAINT	THERE IS H/O RECURRENT UTI WITH DISCHARGE AND DYSURIA INB THE LAST VISIT AFTER ABS BECAME BETTER , BUT AGAIN BECAME SUFFERED DUE TO SAME COMPLAINT NO FEVCER URINE SHOWS MORE THEN 60 WBC ... CULTURE APPLIED		M	46	2019-04-14 14:26:05	2019-04-14	GENERAL PRACTICE	CIPROFLOXACIN	Dysuria	Urinary Tract Infection	Urinary Tract Infection	Appropriate	Appropriate	27	Rustaq Polyclinic
13.1	M	10.1	no	pt c/of sore thraot and feve today with no vomting noraml bowel habit npo urine c/o noskin rash feedingwell child s active		? General Examination:- =>Temp :- 37?C ; ; Weight :- 25Kg ; ; General Condition :- Looks Well ; Jaundice :- No ; Pallor :- No ; Clubbing :- No ; Cyanosis :- No ; Edema Feet :- No ; Throat :- Tonsillitis ? Respiratory Examination:- =>clear ? Abdomen Examination:- =>soft ? CVS Examination:- =>s1s2n ? CNS Examination:- =>orinted no neck rigidty	F	31	2019-04-16 19:40:25	2019-04-16	GENERAL PRACTICE	AMOXYCILLIN	Acute tonsillitis, unspecified		Acute tonsillitis, unspecified	Inappropriate	unnecessary	34	Rustaq Polyclinic
5.9	M	2.9	no		c.cold and fever 2 days .no vomiting ,normal bowel habit		F	45	2019-04-19 22:11:01	2019-04-19	GENERAL PRACTICE	AMOXYCILLIN	Acute pharyngitis, unspecified		Acute pharyngitis, unspecified	Inappropriate	unnecessary	35	Rustaq Polyclinic
6	M	3	no			EPI No.: 56.10.16 IMCI Examination: Diarrhoea :- No Cough:- Yes Throat Problems:- No Fever :- No Ear Problems :- No Additional complaints & Examination: COMMON COLD AND CXOUGH	M	46	2019-04-21 23:10:14	2019-04-21	GENERAL PRACTICE	AMOXYCILLIN	Cough	Acute nasopharyngitis [common cold]	Acute pharyngitis, unspecified	Inappropriate	unnecessary	39	Rustaq Polyclinic
25.5	F	22.5	no	pt c/oof pain and mild swelling in the tooth since 1 week no fever no vomting noraml bowel habit no urien c/o no htn ordm lmplastweek		? General Examination:- =>Temp :- 37?C ; ; General Condition :- Looks Well ; Jaundice :- No ; Pallor :- No ; Clubbing :- No ? Respiratory Examination:- =>clear ? Abdomen Examination:- =>soft ? CVS Examination:- =>s1s2n ? CNS Examination:- =>orinted no enck rigidty	F	31	2019-04-25 18:47:10	2019-04-25	GENERAL PRACTICE	AMOXYCILLIN	Dental caries, unspecified		Gingivitis	Inappropriate	unnecessary	21	Rustaq Polyclinic
4.8	F	1.8	no		c.cold and fever 2 days ,no vomiting ,loos motion yesterday		F	45	2019-04-27 11:14:33	2019-04-27	GENERAL PRACTICE	AMOXYCILLIN	Acute pharyngitis, unspecified		Acute pharyngitis, unspecified	Inappropriate	unnecessary	29	Rustaq Polyclinic
7.2	F	4.2	neg	for FU Stool Routine done today shows Occasional WBCs and Occasional RBCs H/O diarrhoea Since 4days no Fever nO Cough nO Vomiting No SOB No Bodyrash	24/04/19 18:30 STOOL ROUTINE 28/04/19 22:02 CONSISTENCY = LOOSE RBC = OCCASIONAL /[HPF] WBC = OCCASIONAL /[HPF] OVA = NIL CYST = NIL PARASITE = NIL TROPHOZOITE = NIL	? General Examination:-Active Playful , Hydrated =>Temp :- 36?C ;WT 12.2KG ; General Condition :- Looks Well ; Jaundice :- No ; Pallor :- No ? Respiratory Examination:- =>Clear ? Abdomen Examination:- =>Soft ? CVS Examination:- =>S1S2N	F	37	2019-04-28 22:20:13	2019-04-28	GENERAL PRACTICE	METRONIDAZOLE	Diarrhoea and gastroenteritis of presumed infectious origin		Gastroenteritis of presumed infectious origin	Inappropriate	unnecessary	38	Rustaq Polyclinic
10.1	F	7.1	no		pain ear one day no discharge ,no fever	no mastoid tenderness	F	45	2019-05-01 23:01:49	2019-05-01	GENERAL PRACTICE	AMOXYCILLIN	Otalgia		Otalgia	Inappropriate	unnecessary	40	Rustaq Polyclinic
11.1	M	8.1	no	sorethroat with common cold since 2 days .no vomitting.no rash .		? General Examination:- =>Temp :- 37?C ; ; General Condition :- Looks Well ; Throat :- Congested ? Respiratory Examination:- =>nad ? CVS Examination:- =>nad	F	57	2019-05-03 21:37:26	2019-05-03	GENERAL PRACTICE	AMOXYCILLIN	Acute nasopharyngitis [common cold]	Acute pharyngitis, unspecified	Acute pharyngitis, unspecified	Inappropriate	unnecessary	32	Rustaq Polyclinic
19.1	F	16.1	neg	FEVER SINCE YESTERDAY ASSOCIATED WITH VOMITTING SHE VOMITTED 3 TIMES WITH SORE THROAT NO COUGH HER BROTHER HAS URTI		? General Examination:- =>Temp :- 38?C ; ; General Condition :- Looks Well ; Throat :- Tonsillitis,,with submandibular LN enlargement ? Respiratory Examination:- =>Chest Shape :- Normal; Rhonchi :- No;Crepitation :- No; ? Abdomen Examination:- =>LAX ? CVS Examination:- =>NAD ? CNS Examination:- =>NECK LAX,NO SIGNS OF MENINGEAL IRRITATION	F	40	2019-05-06 20:42:45	2019-05-06	GENERAL PRACTICE	AMOXYCILLIN	Acute tonsillitis, unspecified		Acute tonsillitis, unspecified	Inappropriate	escalated use of extended-spectrum antibiotics	32	Rustaq Polyclinic
20.1	F	17.1	no	Sinusitis ?	Pt Known Case Of Allergic Rhinitis C/O Ocular Pain and frontal Headache Since yesterday Pain Increases with Bending forward No Visual Dsturbance No Fever No Vomiting NO SOB No Fits No LOC no eye discharge		F	37	2019-05-09 15:49:16	2019-05-09	GENERAL PRACTICE	AUGMENTIN	Ocular pain	Acute sinusitis	Acute sinusitis	Appropriate	Appropriate	27	Rustaq Polyclinic
14.6	M	11.6	no		pain ear today ,no discharge ,no fever	no mastoid tenderness	F	45	2019-05-11 18:13:44	2019-05-11	GENERAL PRACTICE	AMOXYCILLIN	Otalgia		Otalgia	Inappropriate	unnecessary	34	Rustaq Polyclinic
12.1	M	9.1	no		trauma rt foot today with cut wound	local cut wound no active bleeding	F	45	2019-05-13 23:33:29	2019-05-13	GENERAL PRACTICE	AMOXYCILLIN	Medical care, unspecified	Open wound of unspecified body region	Open wound of unspecified body region	Appropriate	Appropriate	26	Rustaq Polyclinic
4.2	F	1.2	no	C COLD,FEVER 2 DAYS NO LOC NO RASH NO VOMITING FEEDING OK		? General Examination:- =>Temp :- 37?C ; ; Weight :- 7.7Kg ; ; General Condition :- Looks Well ; Cyanosis :- No ; Dehydration :- No ; Throat :- Tonsillitis ? Respiratory Examination:- =>CLEAR ? Abdomen Examination:- =>LAX ? CNS Examination:- =>INTACT	F	38	2019-05-17 14:51:43	2019-05-17	GENERAL PRACTICE	AUGMENTIN	Acute tonsillitis, unspecified		Acute tonsillitis, unspecified	Inappropriate	unnecessary	37	Rustaq Polyclinic
8.5	F	5.5	no		h/o trauma today with cut wound fore head	local cut wound	F	45	2019-05-18 20:05:12	2019-05-18	GENERAL PRACTICE	AMOXYCILLIN	Medical care, unspecified	Open wound of unspecified body region	Open wound of unspecified body region	Inappropriate	unnecessary	23	Rustaq Polyclinic
9.7	F	6.7	no	fever with common cold and cough since 3 days .no vomitting.no rash.no loose motions		? General Examination:- =>Temp :- 37?C ; ; General Condition :- Looks Well ; Throat :- Congested ? Respiratory Examination:- =>nad ? Abdomen Examination:- =>soft ? CVS Examination:- =>nad	F	57	2019-05-21 20:06:01	2019-05-21	GENERAL PRACTICE	AMOXYCILLIN	Acute nasopharyngitis [common cold]		Acute pharyngitis, unspecified	Inappropriate	unnecessary	25	Rustaq Polyclinic
64.7	F	61.7	no		K/C/O DM , Asthma under FU @ RHC C/O Fever Cough Cold And Pain Thraot Since Yesterday No Chest Pain No SOB No Fits No LOC Normal Bowel No Vomiting No Bodyrash No Travelling Chest Xray :		F	37	2019-05-24 10:38:20	2019-05-24	GENERAL PRACTICE	CEFUROXIME	Acute nasopharyngitis [common cold]		Acute pharyngitis, unspecified	Inappropriate	unnecessary	20	Rustaq Polyclinic
5.8	M	2.8	no		Cough Cold Since Yesterday Fever yesterday No Vomiting No SOB No Bodyrash No Fits No LOC Normal Bowel NO Contact or Travelling		F	37	2019-05-26 13:45:35	2019-05-26	GENERAL PRACTICE	AMOXYCILLIN	Acute upper respiratory infection, unspecified		Acute pharyngitis, unspecified	Inappropriate	unnecessary	25	Rustaq Polyclinic
7.1	F	4.1	no	left ear pain today no ear discharge no fever feeding ok		? General Examination:- =>Temp :- 37?C ; ; General Condition :- Looks Well ; Cyanosis :- No ; Dehydration :- No ; Throat :- Congested ? Respiratory Examination:- =>clear ? CNS Examination:- =>no sign of meningeal irritation	F	38	2019-05-29 20:11:00	2019-05-29	GENERAL PRACTICE	AUGMENTIN	Otitis media, unspecified	Otitis media, unspecified	Otitis media, unspecified	Inappropriate	unnecessary	16	Rustaq Polyclinic
13.9	F	10.9	no	headache throat pain		? General Examination:- =>Weight :- 27.2Kg ; ; General Condition :- Fair ; Throat :- Congested ? Respiratory Examination:- =>Chest Shape :- Normal; Respiratory_distress :- No;Chest movement :- Normal;	F	57	2019-06-01 10:27:39	2019-06-01	GENERAL PRACTICE	AMOXYCILLIN	Acute tonsillitis, unspecified	Acute pharyngitis	Acute pharyngitis, unspecified	Inappropriate	unnecessary	18	Rustaq Polyclinic
8.2	M	5.2	no			pt has fever,,runy nose since yesterday no vomiting o/e: throat:tonsillitis with start of follicular tonsilitis chest;clear neck lax,,no signs of meningeal irritation advise: plenty of warm fluids follow up sos	F	40	2019-06-04 21:40:11	2019-06-04	GENERAL PRACTICE	AUGMENTIN	Acute tonsillitis, unspecified		Acute tonsillitis, unspecified	Inappropriate	escalated use of extended-spectrum antibiotics	13	Rustaq Polyclinic
29.9	M	26.9	no	hx of fever,,sore throat no hx of cough,,no runny nose		temp 37.5 throat congested chest clear	F	29	2019-06-07 00:01:40	2019-06-07	GENERAL PRACTICE	AMOXYCILLIN	Acute tonsillitis, unspecified		Acute tonsillitis, unspecified	Inappropriate	unnecessary	30	Rustaq Polyclinic
23.9	M	20.9	no	cough with sense of itching in the throat no fever		? General Examination:- =>Temp :- 37?C ; ; General Condition :- Looks Well ; Throat :- Congested ? Respiratory Examination:- =>Chest Shape :- Normal; Rhonchi :- No;Crepitation :- No; ? Abdomen Examination:- =>lax ? CVS Examination:- =>nad	F	40	2019-06-10 07:56:33	2019-06-10	GENERAL PRACTICE	PHENOXYMETHYLPENICILLIN	Acute pharyngitis, unspecified		Acute pharyngitis, unspecified	Inappropriate	unnecessary	42	Rustaq Polyclinic
4.8	M	1.8	no	come for dreesing , rt hand wound sutured 2 days back			F	33	2019-06-12 17:53:19	2019-06-12	GENERAL PRACTICE	AUGMENTIN	Attention to surgical dressings and sutures		Open wound of unspecified body region	Inappropriate	unnecessary	30	Rustaq Polyclinic
4.5	F	1.5	no			pt seen after IVF ,,,looks well,,no more vomiting as advice from padtric for amoxicillin	F	29	2019-06-16 14:50:43	2019-06-16	GENERAL PRACTICE	AMOXYCILLIN	Diarrhoea and gastroenteritis of presumed infectious origin		Gastroenteritis of presumed infectious origin	Inappropriate	unnecessary	32	Rustaq Polyclinic
3.9	M	0.9	no	THERE IS SWELLING WITH ERTHEMA AT LEFT NIPPLE FOR THE LAST 24-48 HRS ACCORDING TO MOTHER ACCORDING TO MOTHER IN THE NIGHT AND EVENING FEVER BUT NOW NO FEVER 36 C NO PAST H/O TRAUMA OR FALL	ANTIBIOTICS AND OTHER SYMPTOMATICS HAS BEEN ADVISED BUT PARENTS IS INFORNED THAT IF NEXT 48 HRS , IF IT WILL NOT REDUCE THE SIZE AND FEVER , THEN NEED TO REFER TO SPECIALIST IN CASE OF ANY ABNORMAL S/S , PLZ CONSULT IN A & E	? General Examination:- =>Temp :- 36.6?C ; ; General Condition :- Looks Well ; Jaundice :- No ; Pallor :- No ; Cyanosis :- No ; Dehydration :- No ; Throat :- Clear ? Respiratory Examination:- =>Respiratory_distress :- No;Rhonchi :- No;Crepitation :- No;	M	46	2019-06-20 20:31:32	2019-06-20	GENERAL PRACTICE	AMOXYCILLIN	Localized swelling, mass and lump, unspecified	Cellulitis, unspecified	Cellulitis, unspecified	Inappropriate	escalated use of extended-spectrum antibiotics	20	Rustaq Polyclinic
39	M	36	no	pt c/oof sore throat and fever since 3 days iwth no vomting noraml bowel ahbit no urine c/o no htn ordm		? General Examination:- =>BP :- 120/80 mmHg ; Temp :- 37.9?C ; ; General Condition :- Looks Well ; Jaundice :- No ; Pallor :- No ; Throat :- Congested ? Respiratory Examination:- =>clear ? Abdomen Examination:- =>soft ? CVS Examination:- =>s1s2n ? CNS Examination:- =>orinted no enck rigidty	F	31	2019-06-24 19:59:24	2019-06-24	GENERAL PRACTICE	AMOXYCILLIN	Acute pharyngitis, unspecified		Acute pharyngitis, unspecified	Inappropriate	unnecessary	15	Rustaq Polyclinic
29	M	26	no	pain and swelling in the rt ear pinna since 1 year,,frequnt time discharging pus since 1 month ,,pain recurred no fever received treatment several times before with no response		? General Examination:- =>Temp :- 37?C ; ; General Condition :- Looks Well ; Throat :- Clear ? Respiratory Examination:- =>Rhonchi :- No;Crepitation :- No;	F	40	2019-06-29 13:12:09	2019-06-29	GENERAL PRACTICE	CLOXACILLIN	Otalgia		Otitis media, unspecified	Inappropriate	unnecessary	21	Rustaq Polyclinic
30	F	27	urine c/s Ecoli	pt came for follow up of investigations she is 4 months pregnant with UTI,,urine showed bactrial growth sensitive to cefuroxime which she already started 5 days ago no fever or dysuria now no vomitting		? General Examination:- =>Temp :- 37?C ; ; General Condition :- Looks Well ; Throat :- Clear ? Respiratory Examination:- =>Chest Shape :- Normal; Rhonchi :- No;Crepitation :- No; ? Abdomen Examination:- =>lax,,gravid uterus ? CVS Examination:- =>nad	F	40	2019-07-03 09:40:53	2019-07-03	GENERAL PRACTICE	CEFUROXIME	Follow-up examination after unspecified treatment for other conditions	Urinary Tract Infection	Urinary Tract Infection	Appropriate	Appropriate	37	Rustaq Polyclinic
9.3	M	6.3	no	fever since yesterday associated with sre throat no cough no vomititng		? General Examination:- =>Temp :- 37.8?C ; ; General Condition :- Looks Well ; Throat :- Tonsillitis ? Respiratory Examination:- =>Chest Shape :- Normal; Rhonchi :- No;Crepitation :- No; ? Abdomen Examination:- =>lax ? CVS Examination:- =>nad ? CNS Examination:- =>neck lax,no signs of menngeal irritation	F	40	2019-07-06 10:10:29	2019-07-06	GENERAL PRACTICE	AUGMENTIN	Acute tonsillitis, unspecified		Acute tonsillitis, unspecified	Inappropriate	unnecessary	12	Rustaq Polyclinic
36.8	F	33.8	no	known of asthma, migraine present with fever since today early morning documented in home 39 vomiting 4 times no loose motion lmp 2/7		? General Examination:- =>General Condition :- Fair ; Jaundice :- No ; Pallor :- No	F	33	2019-07-09 15:15:25	2019-07-09	GENERAL PRACTICE	AMOXYCILLIN	Fever, unspecified		Fever, unspecified	Inappropriate	unnecessary	25	Rustaq Polyclinic
38.2	F	35.2	no		ear discharge 2 days .no fever ,no chronic illness pt on f/u in rustaq hospital ent clinic	no mastoid tenderness	F	45	2019-07-13 12:01:47	2019-07-13	GENERAL PRACTICE	AUGMENTIN	Otalgia	Otitis externa, unspecified	Otitis externa, unspecified	Inappropriate	unnecessary	27	Rustaq Polyclinic
7.1	F	4.1	no			EPI No.: 70.9.15 IMCI Examination: Diarrhoea :- No Cough:- Yes Throat Problems:- No Fever :- Yes Fever Classification:- Fever cause known Ear Problems :- No Additional complaints & Examination: nil	F	33	2019-07-17 20:23:19	2019-07-17	GENERAL PRACTICE	AMOXYCILLIN	Acute nasopharyngitis [common cold]		Acute pharyngitis, unspecified	Inappropriate	unnecessary	29	Rustaq Polyclinic
25.7	F	22.7	wbc in urine	pregnent twin 6 months lower abdoimnal pain since 3 days no vaginal discharge no urinary complain		? General Examination:- =>General Condition :- Fair ; Jaundice :- No ; Pallor :- No	F	33	2019-07-21 12:37:03	2019-07-21	GENERAL PRACTICE	AMOXYCILLIN	Other and unspecified abdominal pain	Urinary Tract Infection	Urinary Tract Infection	Appropriate	Appropriate	53	Rustaq Polyclinic
40	F	37	mild increase crp	patiuent came to follow up of investigations she had thyroid swelling ,,had operation for biopsy 3 days ago she had dizziness since then,,no fever no vomitting no bleeding from any site also complain of sore throat and cough since 2 days no fever		? General Examination:- =>Appearance :- BP SITTING POSITION 110/70,,STANDING POSITION 100/70 BP :- 110/70 mmHg ; Temp :- 37?C ; ; General Condition :- Looks Well ; Jaundice :- No ; Pallor :- No ; Clubbing :- No ; Throat :- Clear ? Respiratory Examination:- =>Chest Shape :- Normal; Rhonchi :- No;Crepitation :- No; ? Abdomen Examination:- =>lax ? CVS Examination:- => nad ? CNS Examination:- =>NECK …	F	40	2019-07-25 23:13:02	2019-07-25	GENERAL PRACTICE	CEPHALEXIN	Dizziness and giddiness	Acute pharyngitis, unspecified	Acute pharyngitis, unspecified	Inappropriate	unnecessary	23	Rustaq Polyclinic
5.9	F	2.9	no	pain rt ear with common cold and cough since 1 day.no ear discharge.no fever.no vomitting .past h/o similar complaints for which recd med		? General Examination:- =>Temp :- 37?C ; ; General Condition :- Looks Well ; Throat :- Congested ? Respiratory Examination:- =>nad ? CVS Examination:- =>nad	F	57	2019-07-29 15:46:44	2019-07-29	GENERAL PRACTICE	AUGMENTIN	Otalgia	Acute nasopharyngitis [common cold]	Acute pharyngitis, unspecified	Inappropriate	unnecessary	28	Rustaq Polyclinic
80.2	F	77.2	mild increase crp	COUGH SINCE YESTERDAY ASSOCIATED WITH FEVER NO VOMITTING		? General Examination:- =>BP :- 125/65 mmHg ; Temp :- 37?C ; ; RBS :- 23 ; General Condition :- Looks Well ; Throat :- Clear ? Respiratory Examination:- =>SCETTERED CREPITATIONBS OVER THE RT LOWER LOBE ? Abdomen Examination:- =>LAX ? CVS Examination:- =>NAD	F	40	2019-08-02 22:44:06	2019-08-02	GENERAL PRACTICE	AMOXYCILLIN	Lobar pneumonia, unspecified		Pneumonia	Appropriate	Appropriate	33	Rustaq Polyclinic
14.9	F	11.9	no	hx of fever since 3 days ago asscoited with runny nose and cough sore throat no other comaplins		looks well,,not in distress temp 38.6 throat congted	F	29	2019-08-05 20:07:46	2019-08-05	GENERAL PRACTICE	AMOXYCILLIN	Acute tonsillitis, unspecified		Acute tonsillitis, unspecified	Inappropriate	unnecessary	20	Rustaq Polyclinic
3.9	M	0.9	no		Rt Ear Discharge as Coryza Since 3days Fever ?Not Documented NO Cough NO SOB No Fits No Bodyrash No LOC		F	37	2019-08-09 12:46:20	2019-08-09	GENERAL PRACTICE	AMOXYCILLIN	Acute suppurative otitis media		Otitis media, unspecified	Appropriate	Appropriate	17	Rustaq Polyclinic
32.8	M	29.8	no	rt heel injury by glass today no fever no active bleeding not dm		? General Examination:- =>Temp :- 37?C ; ; General Condition :- Looks Well ; Cyanosis :- No ; Dehydration :- No ? Respiratory Examination:- =>clear ? CNS Examination:- =>intact	F	38	2019-08-11 22:48:33	2019-08-11	GENERAL PRACTICE	CLOXACILLIN	Pain in limb	Open wound of unspecified body region	Open wound of unspecified body region	Inappropriate	unnecessary	39	Rustaq Polyclinic
40.6	M	37.6	no	patient came with wounds in the rt index and middle finger ,started after injury with a metalic object		? General Examination:- =>Temp :- 37?C ; ; General Condition :- Looks Well ; Throat :- Clear ? Respiratory Examination:- =>clear ? Abdomen Examination:- =>lax ? CVS Examination:- =>nad	F	40	2019-08-14 20:02:52	2019-08-14	GENERAL PRACTICE	CLOXACILLIN	Unspecified early complication of trauma		Open wound of unspecified body region	Inappropriate	unnecessary	17	Rustaq Polyclinic
6.9	M	3.9	no			? General Examination:-ACTIVE PLAYFUL ,NO MENINGEAL SIGNS =>Temp :- 37.5?C ; ; Weight :- 14.1Kg ; ; General Condition :- Looks Well ; Jaundice :- No ; Pallor :- No ; Throat :- Tonsillitis ? Respiratory Examination:- =>Clear ? Abdomen Examination:- =>Soft ? CVS Examination:- =>S1S2N	F	37	2019-08-17 13:26:49	2019-08-17	GENERAL PRACTICE	AUGMENTIN	Acute tonsillitis, unspecified		Acute tonsillitis, unspecified	Inappropriate	unnecessary	39	Rustaq Polyclinic
39.2	F	36.2	no	sorethroat with common cold since 2 days .no fever.no vomitting.no past h/o ch med illness		? General Examination:- =>BP :- 120/80 mmHg ; Temp :- 37?C ; ; General Condition :- Looks Well throat cong + ? Respiratory Examination:- =>nad ? CVS Examination:- =>nad	F	57	2019-08-20 13:30:52	2019-08-20	GENERAL PRACTICE	AMOXYCILLIN	Acute pharyngitis, unspecified		Acute pharyngitis, unspecified	Inappropriate	unnecessary	43	Rustaq Polyclinic
9.1	M	6.1	neg	low grade fever 2 days no cough no colds no abdominal pain vomiting 2 times normal bowel no urinary symptoms		? General Examination:- =>General Condition :- Fair ; Jaundice :- No ; Pallor :- No ; Throat :- Clear ? Respiratory Examination:- =>clear ? Abdomen Examination:- =>soft no tenderness	F	33	2019-08-23 12:07:39	2019-08-23	GENERAL PRACTICE	AMOXYCILLIN	Fever, unspecified		Fever, unspecified	Inappropriate	unnecessary	18	Rustaq Polyclinic
9.6	M	6.6	no		c.cold and fever 2 days , vomiting 2 times last night ,normal bowel habit		F	45	2019-08-25 20:21:46	2019-08-25	GENERAL PRACTICE	AMOXYCILLIN	Fever, unspecified	Acute nasopharyngitis [common cold]	Acute pharyngitis, unspecified	Inappropriate	unnecessary	35	Rustaq Polyclinic
27.6	F	24.6	no	for MCU for working in MOH not k/c/o any past medical illness		? General Examination:- =>BP :- 110/70 mmHg ; Temp :- 37?C ; ; General Condition :- Looks Well ; Throat :- Clear ? Respiratory Examination:- =>clear ? Abdomen Examination:- =>lax ? CVS Examination:- =>nad	F	40	2019-08-28 12:53:26	2019-08-28	GENERAL PRACTICE	METRONIDAZOLE	Low back pain Lumbar region		Low back pain Lumbar region	Inappropriate	unnecessary	44	Rustaq Polyclinic
82.8	M	79.8	no	kc/o copd on fup at wadi sahtan h/c missed appt in msc .has recurrent cough with difficulty in breathing since long time .related to exertion.no chest pain.no fever.no vomitting.no cough.also has pain both kness .no h/o fall .		? General Examination:- =>BP :- 130/80 mmHg ; Temp :- 37?C ; ; General Condition :- Looks Well ; Pallor :- No ; Dehydration :- No ? Respiratory Examination:- =>Respiratory_distress :- No;Breath Sounds :- Vesicular;Rhonchi :- Yes;Crepitation :- No; ? CVS Examination:- =>NAD	F	57	2019-08-30 12:52:56	2019-08-30	GENERAL PRACTICE	AMOXYCILLIN	Chronic obstructive pulmonary disease, unspecified		Chronic obstructive pulmonary disease, unspecified	Inappropriate	unnecessary	19	Rustaq Polyclinic
9.3	F	6.3	no	SORE TRHOAT	SORE THROAT ,,FEVER SINCE 2D NO COUGH NO VOMMITNG		M	37	2019-09-01 11:03:06	2019-09-01	GENERAL PRACTICE	AMOXYCILLIN	Acute tonsillitis, unspecified		Acute tonsillitis, unspecified	Inappropriate	unnecessary	37	Rustaq Polyclinic
8.6	F	5.6	no		pain ear today ,c.cold 3 days ,no vomiting ,normal bowel habit	no mastoid tenderness	F	45	2019-09-04 18:07:29	2019-09-04	GENERAL PRACTICE	AMOXYCILLIN	Otalgia	Acute nasopharyngitis [common cold]	Acute pharyngitis, unspecified	Inappropriate	unnecessary	47	Rustaq Polyclinic
6.7	F	3.7	no		swelling rt axila one month increased in size with pain ,no fever local swelling redness and tenderness	local swelling redness and tenderness srmo called advised antibiotic and refew sos	F	45	2019-09-07 13:36:34	2019-09-07	GENERAL PRACTICE	CLOXACILLIN	Local infection of skin and subcutaneous tissue, unspecified	Boil	Cutaneous abscess, furuncle and carbuncle, unspecified	Appropriate	Appropriate	48	Rustaq Polyclinic
26.8	F	23.8	EH	came for follow up of lab result			F	29	2019-09-10 13:24:04	2019-09-10	GENERAL PRACTICE	METRONIDAZOLE	Laboratory examination	Gastroentritis	Gastroenteritis of presumed infectious origin	Appropriate	Appropriate	39	Rustaq Polyclinic
6.3	M	3.3	no	COUGH	COUGH,,NASAL CONGESTION ,SINCE 3DAYS ALLERGIC COUGH ASS WITH SORE THROAT T 36 CAME BEFOR 3 DAYS WITH C/O BUT HIS CONDITION NOT IMPROVED.		M	37	2019-09-13 18:31:09	2019-09-13	GENERAL PRACTICE	AMOXYCILLIN	Acute upper respiratory infection, unspecified		Acute pharyngitis, unspecified	Inappropriate	unnecessary	50	Rustaq Polyclinic
16.5	F	13.5	no		c.cold and pain throat 2 days ,no vomiting ,normal bowel habit		F	45	2019-09-16 10:40:41	2019-09-16	GENERAL PRACTICE	AMOXYCILLIN	Acute tonsillitis, unspecified	Acute pharyngitis	Acute pharyngitis, unspecified	Inappropriate	unnecessary	50	Rustaq Polyclinic
34.2	F	31.2	no		pain and swelling at site of wound lt hand 8 days ago sutsure removed yesterday local swelling with tenderness wound partialy healed srmo called advised cloxacillin and tefew in sopd after one week	local swelling with tenderness wound partialy healed srmo called advised cloxacillin and tefew in sopd after one week	F	45	2019-09-19 13:21:53	2019-09-19	GENERAL PRACTICE	CLOXACILLIN	Sequelae of certain early complications of trauma	Infected wound	Infected wound	Appropriate	Appropriate	51	Rustaq Polyclinic
36.4	F	33.4	no	rt thumb pain since 2 days with swelling and rom		x-ray: normal , no fracture	F	33	2019-09-21 20:41:09	2019-09-21	GENERAL PRACTICE	CEFUROXIME	Pain in limb	Cellulitis, unspecified	Cellulitis, unspecified	Inappropriate	escalated use of extended-spectrum antibiotics	36	Rustaq Polyclinic
26.1	F	23.1	wbc in urine	lower abdominal pain	lower abdominal pain lmp 3/9 no dysuria	? General Examination:- =>General Condition :- Fair ; Throat :- Clear ? Respiratory Examination:- =>Chest Shape :- Normal; Respiratory_distress :- No;Chest movement :- Normal; ? Abdomen Examination:- =>Abdominal shape:- Normal;Soft :- Yes;	F	57	2019-09-24 13:47:57	2019-09-24	GENERAL PRACTICE	CEFUROXIME	Other and unspecified abdominal pain	Urinary Tract Infection	Urinary Tract Infection	Inappropriate	escalated use of extended-spectrum antibiotics	53	Rustaq Polyclinic
5.1	M	2.1	no		c.cold and fever one day ,no vomiting ,normal bowel habit		F	45	2019-09-27 15:53:44	2019-09-27	GENERAL PRACTICE	AMOXYCILLIN	Acute pharyngitis, unspecified		Acute pharyngitis, unspecified	Inappropriate	unnecessary	42	Rustaq Polyclinic
12.5	M	9.5	no	cut wound head today 30 min ago minimal bleeding no loc no vomiting		? General Examination:- =>General Condition :- Fair ; Jaundice :- No ; Pallor :- No ; Throat :- Clear superficial wound	F	33	2019-09-29 15:16:57	2019-09-29	GENERAL PRACTICE	AMOXYCILLIN	Attention to surgical dressings and sutures		Open wound of unspecified body region	Inappropriate	unnecessary	30	Rustaq Polyclinic
6.4	F	3.4	no		pain ear 3 days with decreased hearing ,no ear discharge ,cold,no fever	no mastoid tenderness	F	45	2019-10-01 19:15:09	2019-10-01	GENERAL PRACTICE	AUGMENTIN	Otalgia		Otalgia	Inappropriate	unnecessary	35	Rustaq Polyclinic
8.5	M	5.5	EH	loose motions watery no blood since 2 days .no vomitting.no fever.no cough.no pain abdomen		? General Examination:- =>Temp :- 37?C ; ; General Condition :- Looks Well ; Pallor :- No ; Dehydration :- No ? Respiratory Examination:- =>nad ? Abdomen Examination:- =>soft ? CVS Examination:- =>nad	F	57	2019-10-04 15:44:55	2019-10-04	GENERAL PRACTICE	METRONIDAZOLE	Diarrhoea and gastroenteritis of presumed infectious origin		Gastroenteritis of presumed infectious origin	Appropriate	Appropriate	36	Rustaq Polyclinic
5.8	F	2.8	no	FEVER,C COLD SINCE YESTERDAY NO LOC NO RASH NO VOMITING FEEDING OK WORMS AT STOOL		? General Examination:- =>Temp :- 38?C ; ; Weight :- 12Kg ; ; General Condition :- Looks Well ; Cyanosis :- No ; Dehydration :- No ; Throat :- Tonsillitis ? Respiratory Examination:- =>CLEAR ? Abdomen Examination:- =>LAX ? CNS Examination:- =>NO SIGN OF MENINGEAL IRRITATION	F	38	2019-10-05 22:59:43	2019-10-05	GENERAL PRACTICE	AUGMENTIN	Acute tonsillitis, unspecified	Helminthiasis, unspecified	Helminthiasis, unspecified	Inappropriate	unnecessary	42	Rustaq Polyclinic
10.5	F	7.5	no	pt c/oof running nose and cough with fever since 2 dyas iwth no vomting noraml bowel ahbit no urine c/o n o skin rash feedingwell childiis active an playing		? General Examination:- =>Temp :- 37?C ; ; Weight :- 16.1Kg ; ; General Condition :- Looks Well ; Jaundice :- No ; Pallor :- No ; Clubbing :- No ; Cyanosis :- No ; Throat :- Congested ? Respiratory Examination:- =>clear ? Abdomen Examination:- =>soft ? CVS Examination:- =>s1s2n ? CNS Examination:- =>orinted noenck rigidty	F	31	2019-10-08 18:49:02	2019-10-08	GENERAL PRACTICE	AMOXYCILLIN	Acute upper respiratory infection, unspecified		Acute pharyngitis, unspecified	Inappropriate	unnecessary	39	Rustaq Polyclinic
7.3	M	4.3	no	fever and c cold today vomit early morning no loc no rash no urinary or bowel c/o feeding ok		? General Examination:- =>Temp :- 37?C ; ; General Condition :- Looks Well ; Cyanosis :- No ; Dehydration :- No ; Throat :- Tonsillitis ? Respiratory Examination:- =>clear ? Abdomen Examination:- =>lax ? CNS Examination:- =>oriented	F	38	2019-10-10 16:20:19	2019-10-10	GENERAL PRACTICE	AUGMENTIN	Acute tonsillitis, unspecified		Acute tonsillitis, unspecified	Inappropriate	unnecessary	40	Rustaq Polyclinic
8.8	F	5.8	no	FEVER	FEVER SINCE 1D .THERE IS SORE THROAT ,,NO VOMMITNG NO DIARHOEA ABD SOFT NOT TENDER . THROAT CONGESTED		M	37	2019-10-12 10:11:58	2019-10-12	GENERAL PRACTICE	AMOXYCILLIN	Acute pharyngitis, unspecified		Acute pharyngitis, unspecified	Inappropriate	unnecessary	40	Rustaq Polyclinic
12	M	9	no	pt c/oof running nose and cough since 2 days no fever also rt ear pain no truma no f.b no vomting noraml bowel ahbit no urien c/o noskin rash feedinwgell childiis active and playinfg		? General Examination:- =>Temp :- 37?C ; ; Weight :- 28.2Kg ; ; General Condition :- Looks Well ; Jaundice :- No ; Pallor :- No ; Clubbing :- No ; Throat :- Congested ? Respiratory Examination:- =>clear ? Abdomen Examination:- =>soft ? CVS Examination:- =>s1s2n ? CNS Examination:- =>orinted no neck rigidty	F	31	2019-10-14 19:21:34	2019-10-14	GENERAL PRACTICE	AUGMENTIN	Otalgia		Otalgia	Inappropriate	unnecessary	34	Rustaq Polyclinic
9.7	M	6.7	no		tonsilitis and fever 3 days ,no vomiting ,normal bowel habit		F	45	2019-10-16 20:04:58	2019-10-16	GENERAL PRACTICE	AUGMENTIN	Acute tonsillitis, unspecified		Acute tonsillitis, unspecified	Inappropriate	unnecessary	43	Rustaq Polyclinic
3.4	F	1	no	common cold and cough since 2 days .also has discharge lt ear since 2 days .no fever.no vomitting .no rash. b feeding well.		? General Examination:- =>Temp :- 37?C ; ; General Condition :- Looks Well ; Throat :- clear ? Respiratory Examination:- =>nad ? CVS Examination:- =>nad	F	57	2019-10-18 22:35:57	2019-10-18	GENERAL PRACTICE	AMOXYCILLIN	Acute nasopharyngitis [common cold]	Acute Otitis Media	Otitis media, unspecified	Appropriate	Appropriate	33	Rustaq Polyclinic
28.8	M	25.8	no	fever	fever ,,cough since 2d phlegm yellowish in color t 39	? General Examination:- =>Temp :- 39?C ;	M	37	2019-10-20 15:33:27	2019-10-20	GENERAL PRACTICE	AMOXYCILLIN	Pneumonia, unspecified		Pneumonia	Appropriate	Appropriate	50	Rustaq Polyclinic
27.4	M	24.4	no	THERE IS H/O INGROWING NAIL AT RT BIG TOE PAIN AND LOCALIZED SWELLING PREVIOUSLY H/O SAME ON OTHER SIDE ..	THERE IS H/O INGROWING NAIL AT RT BIG TOE PAIN AND LOCALIZED SWELLING PREVIOUSLY H/O SAME ON OTHER SIDE .. THOUGH NO FEVER	? General Examination:- =>Temp :- 36.6?C ; ; General Condition :- Looks Well ; Jaundice :- No ; Pallor :- No ; Cyanosis :- No ; Throat :- Clear PT IS INFORMED THAT MOST PROBSABLY , HE NEED REFERAL TO SURGERY , BUT HE IS NOT READY NOW WANTS ANTIBIOTIC AND OTHER TTT F/U AFTER 5 DAYS	M	46	2019-10-22 11:02:21	2019-10-22	GENERAL PRACTICE	CLOXACILLIN	Ingrowing nail		Cutaneous abscess, furuncle and carbuncle, unspecified	Appropriate	Appropriate	30	Rustaq Polyclinic
6.5	F	3.5	no		Fever Ass Cough Cold Since yesterday No Vomiting no SOB No Fits No LOC Normal Bowel No Bodyrash No Travelling no Contact		F	37	2019-10-23 19:16:01	2019-10-23	GENERAL PRACTICE	AUGMENTIN	Acute tonsillitis, unspecified	Acute bronchiolitis, unspecified	Acute bronchiolitis, unspecified	Inappropriate	unnecessary	33	Rustaq Polyclinic
50.8	F	47.8	no		c.cold and fever 2 days ,no vomiting,normal bowel habit ,no chronic illness		F	45	2019-10-25 20:19:18	2019-10-25	GENERAL PRACTICE	AMOXYCILLIN	Acute pharyngitis, unspecified		Acute pharyngitis, unspecified	Inappropriate	unnecessary	41	Rustaq Polyclinic
30.4	M	27.4	no	pt clo pain in the lt knee with skin lesion over the lt knee since 1 week with h/oof fallon the ground no fever no vomting noraml bowel ahbit no urien c/o no htnordm		? General Examination:- =>Temp :- 37?C ; ; General Condition :- Looks Well ; Jaundice :- No ; Pallor :- No ? Respiratory Examination:- =>clear ? Abdomen Examination:- =>soft ? CVS Examination:- =>s1s2n ? CNS Examination:- =>orinted no neck rigidty	F	31	2019-10-27 13:51:40	2019-10-27	GENERAL PRACTICE	AMOXYCILLIN	Pain in joint	Open wound of unspecified body region	Open wound of unspecified body region	Inappropriate	unnecessary	37	Rustaq Polyclinic
38.2	F	35.2	no	pregnant still has c cold,fever and sore throat no pv bleeding or abnormal discharge		? General Examination:- =>Temp :- 37?C ; ; General Condition :- Looks Well ; Cyanosis :- No ; Dehydration :- No ; Throat :- Tonsillitis ? Respiratory Examination:- =>clear ? Abdomen Examination:- =>lax ? CNS Examination:- =>intact	F	38	2019-10-29 08:33:05	2019-10-29	GENERAL PRACTICE	CEFUROXIME	Acute tonsillitis, unspecified		Acute tonsillitis, unspecified	Inappropriate	unnecessary	44	Rustaq Polyclinic
14.2	M	11.2	high wbc and neutrophil	father came to follow up wiuth investigations the child had fever and cough since 4 day but the cough is persistant alone since 2 weeks no vomting cbc showing leucocytosis with esr 44		? General Examination:- =>Appearance :- the child didnot come	F	40	2019-10-30 19:32:49	2019-10-30	GENERAL PRACTICE	AUGMENTIN	Acute tonsillitis, unspecified	Sepsis	Sepsis	Appropriate	Appropriate	45	Rustaq Polyclinic
6.5	M	3.5	no	swelling rt sie nck	swelling rt side neck sice yesterday no fever no cough	? General Examination:- =>Appearance :- pain less swlling rt side neck ; Temp :- 36?C ; ; Weight :- 13.6Kg ; ; General Condition :- Critical	F	57	2019-11-01 13:20:09	2019-11-01	GENERAL PRACTICE	AUGMENTIN	Localized swelling, mass and lump, neck		Localized swelling, mass and lump, unspecified	Inappropriate	unnecessary	34	Rustaq Polyclinic
7.1	F	4.1	no	pt c/oof running nose and cough and fever today with rt ear pain no vomting noraml bowel ahbit no urein c/o noskin rash feedingwell childis active and playing			F	31	2019-11-02 20:03:49	2019-11-02	GENERAL PRACTICE	AUGMENTIN	Acute tonsillitis, unspecified		Acute tonsillitis, unspecified	Inappropriate	unnecessary	41	Rustaq Polyclinic
27.9	M	24.9	no	sore throat	sore throat ,,fever since 2d pus cells in both tonsils. t 37		M	37	2019-11-04 10:31:26	2019-11-04	GENERAL PRACTICE	AMOXYCILLIN	Acute tonsillitis, unspecified	Acute follicular tonsillitis	Acute tonsillitis, unspecified	Appropriate	Appropriate	45	Rustaq Polyclinic
8.2	M	5.2	no	cough	cough since one month dry cough allergic in nature t 37,1 sore throat tonisls enlarged		M	37	2019-11-06 18:46:37	2019-11-06	GENERAL PRACTICE	AMOXYCILLIN	Acute tonsillitis, unspecified		Acute tonsillitis, unspecified	Inappropriate	unnecessary	43	Rustaq Polyclinic
13.5	F	10.5	no	pt c/oof running nose and cough since2 days with fever no vomting noraml bowel ahbit no urien c/o noskin rsah feeding well childiis cative		? General Examination:- =>Temp :- 37?C ; ; Weight :- 62.8Kg ; ; General Condition :- Looks Well ; Jaundice :- No ; Pallor :- No ; Throat :- Tonsillitis ? Respiratory Examination:- =>clear ? Abdomen Examination:- =>soft ? CVS Examination:- =>s1s2n ? CNS Examination:- =>orinted no neck rigidty	F	31	2019-11-08 19:42:53	2019-11-08	GENERAL PRACTICE	AUGMENTIN	Acute tonsillitis, unspecified		Acute tonsillitis, unspecified	Inappropriate	unnecessary	42	Rustaq Polyclinic
6.1	M	3.1	no	fever,,runny nose and cough since 1 week no vomitting		? General Examination:- =>Temp :- 37.8?C ; ; General Condition :- Looks Well ; Throat :- Congested ? Respiratory Examination:- =>clear,,no additional sounds ? Abdomen Examination:- =>lax,,no tenderness or rigidity ? CVS Examination:- =>nad	F	40	2019-11-08 08:30:40	2019-11-08	GENERAL PRACTICE	AUGMENTIN	Acute upper respiratory infection, unspecified		Acute pharyngitis, unspecified	Inappropriate	unnecessary	37	Rustaq Polyclinic
35.7	M	32.7	no	feevr since 2 days associated with sore throat and hoarsness of voice with cough also complain of snoring since 1 year with blocked nose		? General Examination:- =>Temp :- 37?C ; ; General Condition :- Looks Well ; Throat :- Congested ? Respiratory Examination:- =>Chest Shape :- Normal; Rhonchi :- No;Crepitation :- No; ? Abdomen Examination:- =>lax ? CVS Examination:- =>nad	F	40	2019-11-09 18:00:21	2019-11-09	GENERAL PRACTICE	AMOXYCILLIN	Acute laryngitis		Acute laryngitis	Inappropriate	unnecessary	42	Rustaq Polyclinic
6.5	F	3.5	no	fever	fever since 2 days no cough	? General Examination:- =>Appearance :- given adol at home ; Temp :- 36?C ; ; Weight :- 14.7Kg ; ; General Condition :- Fair ; Throat :- Congested ? Respiratory Examination:- =>Chest Shape :- Normal; Respiratory_distress :- No;	F	57	2019-11-10 20:03:01	2019-11-10	GENERAL PRACTICE	AMOXYCILLIN	Fever, unspecified	Acute pharyngitis, unspecified	Acute pharyngitis, unspecified	Inappropriate	unnecessary	27	Rustaq Polyclinic
19	M	16	no	rt upper dental pain and swelling no fever not dm		? General Examination:- =>Temp :- 37?C ; ; General Condition :- Looks Well ; Cyanosis :- No ; Dehydration :- No ? Respiratory Examination:- =>clear ? Abdomen Examination:- =>lax	F	38	2019-11-12 13:12:04	2019-11-12	GENERAL PRACTICE	METRONIDAZOLE	Dental caries, unspecified		Gingivitis	Inappropriate	unnecessary	46	Rustaq Polyclinic
17	M	14	neg	pt c/oof fever isnce yesaterdy with no vomting noraml bowel ahbit no urien c/o no htn ordm		? General Examination:- =>BP :- 110/70 mmHg ; Temp :- 38.3?C ; ; General Condition :- Looks Well ; Jaundice :- No ; Pallor :- No ; Throat :- Congested ? Respiratory Examination:- =>clear ? Abdomen Examination:- =>soft ? CVS Examination:- =>s1s2n ? CNS Examination:- =>orinted no neck rigidty	F	31	2019-11-14 09:26:48	2019-11-14	GENERAL PRACTICE	AMOXYCILLIN	Fever, unspecified	Acute nasopharyngitis [common cold]	Acute pharyngitis, unspecified	Inappropriate	unnecessary	37	Rustaq Polyclinic
25.3	F	22.3	no	left valval swelling 2weeks no fever not dm lmp 26/10		? General Examination:- =>Temp :- 37?C ; ; General Condition :- Looks Well ; Cyanosis :- No ; Dehydration :- No ? Respiratory Examination:- =>clear ? CNS Examination:- =>intact	F	38	2019-11-15 19:00:42	2019-11-15	GENERAL PRACTICE	METRONIDAZOLE	Cyst of Bartholin's gland		Cutaneous abscess, furuncle and carbuncle, unspecified	Inappropriate	incorrect spectrum of antibiotic	42	Rustaq Polyclinic
26.6	F	23.6	wbc in urine		22+weeks Pregnancy with C/O Fever Low grade ass Cough Cold Since 4days Headache No Chest pain NO Vomiting nO SOB No Bodyrash No LOC No Vag Discharge or BleedingNO Travelling	? General Examination:- =>BP :- 100/70 mmHg ; Temp :- 37.5?C ; ; General Condition :- Looks Well ; Jaundice :- No ; Pallor :- No ; Throat :- Congested ? Respiratory Examination:- =>Clear ? Abdomen Examination:- =>Gravid ? CVS Examination:- =>S1S2N ? CNS Examination:- =>Intact no Meningeal Signs	F	45	2019-11-17 15:51:03	2019-11-17	GENERAL PRACTICE	CEFUROXIME	Acute upper respiratory infection, unspecified	Urinary Tract Infection	Urinary Tract Infection	Inappropriate	escalated use of extended-spectrum antibiotics	48	Rustaq Polyclinic
61.3	F	58.3	no	K/C/O ??old TB fcomplain of fever since yesterday associated with runny nose and cough no vomitting no h/o recnt travel(last time 6 years ago)		? General Examination:- =>BP :- 110/80 mmHg ; Temp :- 38?C ; ; General Condition :- Looks Well ; Throat :- Congested ? Respiratory Examination:- =>scattered whezes allover the chest with creps after nebulizer,,localized crepitations over the lowet lt lobe ? Abdomen Examination:- =>lax ? CVS Examination:- =>nad ? CNS Examination:- =>neck lax,no signs of meningeal irritation	F	40	2019-11-18 23:13:22	2019-11-18	GENERAL PRACTICE	CEFUROXIME	Pneumonia, unspecified		Pneumonia	Appropriate	Appropriate	33	Rustaq Polyclinic
6.1	F	3.1	no	otitis media	Pain Rt Ear Since 1day ,has coryza No Fever no Cough nO SOB No fits No loc nromal Bowel No bodyrash		F	37	2019-11-20 17:20:18	2019-11-20	GENERAL PRACTICE	AMOXYCILLIN	Otitis media, unspecified		Otitis media, unspecified	Appropriate	Appropriate	28	Rustaq Polyclinic
6.9	F	3.9	no	THERE IS H/O PAIN IN THROAT AND COMMON COLD WITH FEVER NO OTHER ACTIVE ISSUE ...	THERE IS H/O PAIN IN THROAT AND COMMON COLD WITH FEVER NO OTHER ACTIVE ISSUE ... NO LOOSE STOOLS	? General Examination:- =>Temp :- 36.6?C ; ; Weight :- 21Kg ; ; General Condition :- Looks Well ; Jaundice :- No ; Pallor :- No ; Cyanosis :- No ; Dehydration :- No ; Throat :- Congested ? Respiratory Examination:- =>Respiratory_distress :- No;Rhonchi :- No;Crepitation :- No;	M	46	2019-11-22 14:41:41	2019-11-22	GENERAL PRACTICE	AMOXYCILLIN	Acute nasopharyngitis [common cold]	Acute tonsillitis, unspecified	Acute tonsillitis, unspecified	Inappropriate	unnecessary	35	Rustaq Polyclinic
8.2	M	5.2	no	fever and c cold today no loc no rash no vomiting feeding ok		? General Examination:- =>Temp :- 38.5?C ; ; General Condition :- Looks Well ; Cyanosis :- No ; Dehydration :- No ; Throat :- Congested ? Respiratory Examination:- =>clear ? Abdomen Examination:- =>lax ? CNS Examination:- =>intact	F	38	2019-11-23 22:35:05	2019-11-23	GENERAL PRACTICE	AMOXYCILLIN	Acute upper respiratory infection, unspecified		Acute pharyngitis, unspecified	Inappropriate	unnecessary	47	Rustaq Polyclinic
7.4	M	4.4	EH	loose motoin vomiting about 4 times loose motoin 3 times fever		? General Examination:- =>Temp :- 36?C ; ; Weight :- 13.1Kg ; ; General Condition :- Fair ; Throat :- Clear ? Respiratory Examination:- =>Chest Shape :- Normal; Respiratory_distress :- No;Chest movement :- Normal;	F	57	2019-11-24 23:19:57	2019-11-24	GENERAL PRACTICE	METRONIDAZOLE	Nausea and vomiting	Diarrhoea and gastroenteritis of presumed infectious origin	Gastroenteritis of presumed infectious origin	Appropriate	Appropriate	38	Rustaq Polyclinic
6.2	F	3.2	no	throat pain and colds cough high fever 3 days recived tt no improvement no other complain		? General Examination:- =>Temp :- 39?C ; ; General Condition :- Fair ; Jaundice :- No ; Pallor :- No ; Throat :- folicullar Tonsillitis ? Respiratory Examination:- => clear	F	33	2019-11-26 20:02:36	2019-11-26	GENERAL PRACTICE	AMOXYCILLIN	Acute tonsillitis, unspecified	Acute follicular tonsillitis	Acute tonsillitis, unspecified	Appropriate	Appropriate	35	Rustaq Polyclinic
15.8	F	12.8	neg	vomiting 5 times since afternoon diarrhea, watery loos motion fever since morning			F	40	2019-11-28 22:25:23	2019-11-28	GENERAL PRACTICE	CEFUROXIME	Viral intestinal infection, unspecified		Gastroenteritis of presumed infectious origin	Inappropriate	unnecessary	35	Rustaq Polyclinic
5	M	2	no	sore throat ,,fever snce 3 days ass with cough . t36		? General Examination:- =>Temp :- 36?C ; ; Throat :- Clear	M	37	2019-11-30 18:21:33	2019-11-30	GENERAL PRACTICE	AMOXYCILLIN	Acute tonsillitis, unspecified		Acute tonsillitis, unspecified	Inappropriate	unnecessary	55	Rustaq Polyclinic
28.1	F	25.1	no	pt c/oof pain in rt ear pain isnce 5 days with no fever no vomting laso h/oof running nose and cough and on sympatomatic medication noraml bowel ahbit no htn or dr lmp 14/11/19		? General Examination:- =>BP :- 110/70 mmHg ; Temp :- 37?C ; ; General Condition :- Looks Well ; Jaundice :- No ; Pallor :- No ? Respiratory Examination:- =>clear ? Abdomen Examination:- =>soft ? CVS Examination:- =>s1s2n ? CNS Examination:- =>orinted no neck rigidty	F	31	2019-12-03 07:26:22	2019-12-03	GENERAL PRACTICE	AMOXYCILLIN	Otalgia		Otalgia	Inappropriate	unnecessary	38	Rustaq Polyclinic
17.9	F	14.9	no	pt c/oof fever today with no fever no vomting noraml bowel ahbit no urien c/o no htn ordm e		? General Examination:- =>BP :- 110/80 mmHg ; Temp :- 38.5?C ; ; General Condition :- Looks Well ; Jaundice :- No ; Pallor :- No ; Throat :- Congested ? Respiratory Examination:- =>clear ? Abdomen Examination:- =>soft ? CVS Examination:- =>s1s2n ? CNS Examination:- =>orinted no neck rigidty	F	31	2019-12-04 18:39:30	2019-12-04	GENERAL PRACTICE	CEFUROXIME	Acute pharyngitis, unspecified		Acute pharyngitis, unspecified	Inappropriate	unnecessary	30	Rustaq Polyclinic
4.3	M	1.3	no	cough ,,nasal congestion ,,fever since 4days ... fever not resolved even by adol chest mild crebs. t 36.9			M	37	2019-12-06 13:34:22	2019-12-06	GENERAL PRACTICE	AMOXYCILLIN	Acute upper respiratory infection, unspecified		Acute pharyngitis, unspecified	Inappropriate	unnecessary	36	Rustaq Polyclinic
11.9	M	8.9	no	both legs pain since 3 days. no fever no abd pain no vommitng .			M	37	2019-12-08 16:57:09	2019-12-08	GENERAL PRACTICE	AMOXYCILLIN	Pain in joint		Pain in joint	Inappropriate	unnecessary	33	Rustaq Polyclinic
6.2	F	3.2	no	pt c/oof running nose and cougs ince 2 days with no fever no vomting noraml bowel ahbit no urien c/o noskin rsah feedingwell childiis active		? General Examination:- =>Temp :- 38.8?C ; ; Weight :- 12.2Kg ; ; General Condition :- Looks Well ; Jaundice :- No ; Pallor :- No ; Throat :- Congested ? Respiratory Examination:- =>clear ? Abdomen Examination:- =>soft ? CVS Examination:- =>s1s2n ? CNS Examination:- =>orinted no neck rigidty	F	31	2019-12-10 20:37:23	2019-12-10	GENERAL PRACTICE	AUGMENTIN	Acute nasopharyngitis [common cold]		Acute pharyngitis, unspecified	Inappropriate	unnecessary	39	Rustaq Polyclinic
17.1	F	14.1	neg	loose motoin	loose motoin since yesterday recurrent no vomiting	? General Examination:- =>BP :- 120/80 mmHg ; General Condition :- Fair ; Throat :- Clear ? Respiratory Examination:- =>Chest Shape :- Normal; Respiratory_distress :- No;	F	40	2019-12-12 21:32:12	2019-12-12	GENERAL PRACTICE	METRONIDAZOLE	Diarrhoea and gastroenteritis of presumed infectious origin		Gastroenteritis of presumed infectious origin	Inappropriate	unnecessary	38	Rustaq Polyclinic
16.6	M	13.6	no		fever ass Cough cold since 2days no Vomiting no SOB No fits No LOC Normal bowel No bodyrash		F	37	2019-12-14 10:22:43	2019-12-14	GENERAL PRACTICE	AMOXYCILLIN	Acute upper respiratory infection, unspecified		Acute pharyngitis, unspecified	Inappropriate	unnecessary	36	Rustaq Polyclinic
7	M	4	no	ARI ON AMOX STILL C/O FEVER NO LOC NO RASH NO VOMITING FEEDING OK		? General Examination:- =>Temp :- 37?C ; ; General Condition :- Looks Well ; Cyanosis :- No ; Dehydration :- No ; Throat :- Tonsillitis ? Respiratory Examination:- =>CLEAR ? Abdomen Examination:- =>LAX ? CNS Examination:- =>INTACT	F	38	2019-12-15 22:26:41	2019-12-15	GENERAL PRACTICE	AUGMENTIN	Acute upper respiratory infection, unspecified		Acute pharyngitis, unspecified	Inappropriate	unnecessary	52	Rustaq Polyclinic
8.1	M	5.1	no	sore throat ,,fever since 2d tonsils enlarged . t 38.4		? General Examination:- =>Temp :- 38.4?C ; ; Throat :- Tonsillitis	M	37	2019-12-17 19:24:57	2019-12-17	GENERAL PRACTICE	AMOXYCILLIN	Acute tonsillitis, unspecified		Acute tonsillitis, unspecified	Inappropriate	unnecessary	49	Rustaq Polyclinic
10.4	M	7.4	no	pt refered from wadi hemly for paedateric dr pt c/oof running nose and cough and fever since 5 days with headcahe on and off no vomting no lossof consinunes no sezeries noraml boewl habit no urien c/o noksin rash feedingwell childiis cative		? General Examination:- =>Temp :- 37.7?C ; ; Weight :- 24Kg ; ; General Condition :- Looks Well ; Jaundice :- No ; Pallor :- No ; Throat :- Congested ? Respiratory Examination:- =>clear ? Abdomen Examination:- =>soft ? CVS Examination:- =>s1s2n ? CNS Examination:- =>orinted no neck rigidty	F	31	2019-12-19 20:22:43	2019-12-19	GENERAL PRACTICE	AMOXYCILLIN	Acute nasopharyngitis [common cold]		Acute pharyngitis, unspecified	Inappropriate	unnecessary	29	Rustaq Polyclinic
78.8	M	75.8	stool trichomonas hominis	FU for investigations done yesterday for diarrhoea ..... h/o eating some leaves from the tree added in tea no fever no vomiting no chest pain no sob no loc known case dm	20/12/19 22:17 STOOL ROUTINE 21/12/19 12:25 CONSISTENCY = SOFT RBC = NIL /[HPF] WBC = 1-2 /[HPF] OVA = NIL CYST = NIL TROPHOZOITE = Trichomonas hominis(10-12/HPF)	? General Examination:- =>BP :- 120/80 mmHg ; Temp :- 36?C ; ; General Condition :- Looks Well ; Jaundice :- No ; Pallor :- No ? Respiratory Examination:- =>cLEAR ? Abdomen Examination:- =>SOFT ? CVS Examination:- =>S1S2N ? CNS Examination:- =>Intact No Meningeal Signs	F	37	2019-12-21 12:38:58	2019-12-21	GENERAL PRACTICE	METRONIDAZOLE	Person consulting for explanation of investigation findings	Diarrhoea and gastroenteritis of presumed infectious origin	Gastroenteritis of presumed infectious origin	Appropriate	Appropriate	40	Rustaq Polyclinic
43.8	F	40.8	no	htn and dm lmp 14/12 c/o left ear pain 1 week no fever no ear discharge c cold+		? General Examination:- =>BP :- 140/90 mmHg ; Temp :- 37?C ; ; General Condition :- Looks Well ; Cyanosis :- No ; Dehydration :- No ; Throat :- Congested ? Respiratory Examination:- =>clear ? CNS Examination:- =>intact	F	38	2019-12-23 12:17:01	2019-12-23	GENERAL PRACTICE	CEFUROXIME	Otitis media, unspecified	Otalgia	Otalgia	Inappropriate	unnecessary	46	Rustaq Polyclinic
9.8	F	6.8	no	c cold.fever and sore throat today no loc no rash no vomiting feeding ok		? General Examination:- =>Temp :- 38.1?C ; ; General Condition :- Looks Well ; Cyanosis :- No ; Dehydration :- No ; Throat :- Congested ? Respiratory Examination:- =>clear ? Abdomen Examination:- =>lax ? CNS Examination:- =>no sign of meningeal irritation	F	38	2019-12-25 20:21:46	2019-12-25	GENERAL PRACTICE	AUGMENTIN	Acute upper respiratory infection, unspecified		Acute pharyngitis, unspecified	Inappropriate	unnecessary	31	Rustaq Polyclinic
3.2	F	1	no	left ear discharge 1day c cold+ no fever no vomiting feeding ok		? General Examination:- =>Temp :- 37?C ; ; Weight :- 5.8Kg ; ; General Condition :- Looks Well ; Cyanosis :- No ; Dehydration :- No ; Throat :- Congested ? Respiratory Examination:- =>clear ? CNS Examination:- =>no sign of meningeal irritation	F	38	2019-12-27 13:14:06	2019-12-27	GENERAL PRACTICE	AUGMENTIN	Otitis media, unspecified		Otitis media, unspecified	Appropriate	Appropriate	28	Rustaq Polyclinic
9.5	F	6.5	no	sore throat ,,,cough barking cough since 2d no fever no vommitng ass with left ear pain . mild inflamation of tympanic membrane.		? General Examination:- =>Temp :- 36?C ; ; Throat :- Tonsillitis	M	37	2019-12-28 15:22:22	2019-12-28	GENERAL PRACTICE	AMOXYCILLIN	Acute obstructive laryngitis [croup]		Acute laryngitis	Inappropriate	unnecessary	57	Rustaq Polyclinic
6.8	M	3.8	neg	for Fu labs 5days h/o fever ass Cough cold no Vomiting no SOB no fits no loc nroaml bowel no bodyrash no travelling ================	30/12/19 12:28 CRP (C REACTIVE PROTEIN) 30/12/19 13:58 C - REACTIVE PROTEIN = 0.94 mg/L (0 - 5) Less than 5.0 30/12/19 12:28 Urine Culture 30/12/19 12:28 URINE ROUTINE 30/12/19 12:58 GLUCOSE = NIL mmol/L ALBUMIN = NIL WBC = 4 /uL RBC = <4 /uL SQUAMOUS EPITH. CELLS = <4 /uL CAST = NIL CRYSTALS = NIL pH = 6.0 30/12/19 12:28 CBC 30/12/19 13:32 WBC. = 5.56 10 3/uL (5 - 15) 5.0-15.0 NEU# = 1.78 10 3/u…		F	37	2019-12-30 16:02:52	2019-12-30	GENERAL PRACTICE	AUGMENTIN	Acute upper respiratory infection, unspecified		Acute pharyngitis, unspecified	Inappropriate	unnecessary	33	Rustaq Polyclinic
68.8	F	65.8	wbc in urine				F	36	2019-01-06 07:09:42	2019-01-06	GENERAL PRACTICE	CEPHALEXIN	Urinary tract infection, site not specified		Urinary Tract Infection	Appropriate	Appropriate	19	WadiBaniAufHC
7.3	M	4.3	no			IMCI Examination: Diarrhoea :- No Cough :- No Throat Problems:- No Fever :- No Ear Problems :- No Additional complaints & Examination: no other complaints	F	36	2019-03-05 09:17:03	2019-03-05	GENERAL PRACTICE	AMOXYCILLIN	Localized swelling, mass and lump, unspecified		Localized swelling, mass and lump, unspecified	Inappropriate	unnecessary	13	WadiBaniAufHC
38.6	M	35.6	no		THROAT PAIN SEVER DRY COUGH CHEST PAIN FROM THE COUGH/2D SOB	? General Examination:- =>BP :- 130/87 mmHg ; SPO2 :- 100 ; Pulse :- 110bts/min ; General Condition :- Fair ; Jaundice :- No ; Pallor :- No ; Throat :- Congested ? Respiratory Examination:- =>NAD	F	36	2019-04-22 16:46:26	2019-04-22	GENERAL PRACTICE	AUGMENTIN	Acute bronchitis, unspecified		Acute bronchitis, unspecified	Inappropriate	unnecessary	7	WadiBaniAufHC
32.5	F	29.5	no		FEVER THROAT PAIN NO COLD OR COUGH NO DM OR HTN	? General Examination:- =>BP :- 130/80 mmHg ; Temp :- 36.6?C ; ; Pulse :- 100bts/min ; General Condition :- Fair ; Throat :- F.Tonsillitis	F	36	2019-06-16 09:46:50	2019-06-16	GENERAL PRACTICE	AUGMENTIN	Acute tonsillitis, unspecified	Acute follicular tonsillitis	Acute tonsillitis, unspecified	Appropriate	Appropriate	16	WadiBaniAufHC
4.8	F	1.8	no	fever with low oral intake since yestyerday. Moist cough + No cold or other complaints. UOP, BO - normal		? General Examination:- =>Appearance :- Hoarse voice + ; Temp :- 36.5?C ; ; Weight :- 8.8Kg ; ; Pallor :- No ; Dehydration :- No ; Lymphadenopathy :- No ; Throat :- Congested ? Respiratory Examination:- =>Clear ? Abdomen Examination:- =>Soft ? CVS Examination:- =>Dual thythm	M	37	2019-07-29 15:54:32	2019-07-29	GENERAL PRACTICE	ERYTHROMYCIN	Acute pharyngitis, unspecified		Acute pharyngitis, unspecified	Inappropriate	unnecessary	7	WadiBaniAufHC
26.2	M	23.2	no	Known pt with poorly controlled Type II DM with multiple complications He was admitted and followed up at Rustaq hospital, Having left lower limb swelling for about 2 months and arranged Doppler scan from RPC not not gone. Now C/O - Infected wound at left 4 th toe for anout 4 days. ?Not taken Insulin and breakfast today morning and agreed to it as soon as they go home now.		? General Examination:- =>Appearance :- Left lowel limb oedema + Infected wound present at left 4th toe with pus	M	37	2019-09-12 08:25:40	2019-09-12	GENERAL PRACTICE	CLOXACILLIN	Non-insulin-dependent diabetes mellitus With multiple complications	Infected wound	Infected wound	Appropriate	Appropriate	17	WadiBaniAufHC
6.5	M	3.5	no			sever productive cough throat pain fever , EPI No.: 001-04-16 IMCI Examination: Diarrhoea :- NoDehydration Classification:- No Cough:- Auscultatory Findings:mild crep Cough Classification:- Enlarged but Normal Bronchiolitis Throat Problems:- No Fever :- Yes Fever Classification:- Fever cause known Ear Problems :- No	F	36	2019-11-04 15:21:02	2019-11-04	GENERAL PRACTICE	AMOXYCILLIN	Acute bronchiolitis, unspecified		Acute bronchiolitis, unspecified	Inappropriate	unnecessary	7	WadiBaniAufHC
6.6	F	3.6	no			EPI No.: 005022016 IMCI Examination: Diarrhoea :- No Cough:- Yes Cough Classification:- Coryza(runing nose) Throat Problems:- No Throat Classification:- Suspected streptococcal sore throat Fever :- Yes Fever Classification:- Fever cause known Ear Problems :- No	M	37	2019-12-12 07:50:09	2019-12-12	GENERAL PRACTICE	AMOXYCILLIN	Acute upper respiratory infection, unspecified	Streptococcal pharyngitis	Acute pharyngitis, unspecified	Appropriate	Appropriate	19	WadiBaniAufHC
8.9	F	5.9	no	rt ear pain 1 day		? General Examination:- =>Temp :- 37.1?C ; ; General Condition :- Looks Well ; Throat :- Congested ? Respiratory Examination:- =>nad ? Abdomen Examination:- =>nad ? CVS Examination:- =>nad	M	46	2019-01-01 18:29:44	2019-01-01	GENERAL MEDICINE	AMOXYCILLIN	Otalgia	Acute pharyngitis	Acute pharyngitis, unspecified	Inappropriate	unnecessary	39	WadiBaniGafer Local Hospital
10.6	M	7.6	no	sore throat , fever 2 days		? General Examination:- =>Temp :- 37?C ; ; General Condition :- Looks Well ; Throat :- Tonsillitis ? Respiratory Examination:- =>nad ? Abdomen Examination:- =>nad ? CVS Examination:- =>nad	M	46	2019-01-14 16:55:25	2019-01-14	GENERAL MEDICINE	AMOXYCILLIN	Acute tonsillitis, unspecified		Acute tonsillitis, unspecified	Inappropriate	unnecessary	27	WadiBaniGafer Local Hospital
22.7	M	19.7	no	SMALL CUT WOUND IN THE RT THUMB TODAY .. NO LIMITATION OF MOVEMENT		? General Examination:- =>BP :- 120/80 mmHg ; Temp :- 37?C ; ; General Condition :- Looks Well ? Respiratory Examination:- =>NAD	M	46	2019-01-26 10:19:54	2019-01-26	GENERAL MEDICINE	CLOXACILLIN	Pain in limb	Open wound of unspecified body region	Open wound of unspecified body region	Inappropriate	unnecessary	16	WadiBaniGafer Local Hospital
5.6	M	2.6	no	fever , cough , runny nose 3 days , sore throat		? General Examination:- =>Temp :- 37?C ; ; General Condition :- Looks Well ; Throat :- Tonsillitis ? Respiratory Examination:- =>nad ? Abdomen Examination:- =>nad ? CVS Examination:- =>nad	M	46	2019-02-17 21:09:41	2019-02-17	GENERAL MEDICINE	AMOXYCILLIN	Acute upper respiratory infection, unspecified	Acute tonsillitis, unspecified	Acute tonsillitis, unspecified	Inappropriate	unnecessary	37	WadiBaniGafer Local Hospital
5.3	F	2.3	no	sore throat , fever , loss of appetite since 2 days		? General Examination:- =>Temp :- 37?C ; ; General Condition :- Looks Well ; Throat :- Tonsillitis ? Respiratory Examination:- =>nad ? Abdomen Examination:- =>nad ? CVS Examination:- =>nad	M	46	2019-03-02 17:20:15	2019-03-02	GENERAL MEDICINE	AMOXYCILLIN	Acute tonsillitis, unspecified		Acute tonsillitis, unspecified	Inappropriate	unnecessary	35	WadiBaniGafer Local Hospital
7.9	M	4.9	no	small superficial wound of the fore head			M	46	2019-03-27 16:36:29	2019-03-27	GENERAL PRACTICE	CLOXACILLIN	Pain, unspecified	Open wound of unspecified body region	Open wound of unspecified body region	Inappropriate	unnecessary	19	WadiBaniGafer Local Hospital
7.6	M	4.6	no	fever since yesterday , vomiting today..			M	46	2019-05-07 10:53:42	2019-05-07	GENERAL PRACTICE	AMOXYCILLIN	Acute pharyngitis, unspecified		Acute pharyngitis, unspecified	Inappropriate	unnecessary	22	WadiBaniGafer Local Hospital
4.3	F	1.3	no	fever since 2 days.. papular eruptions in both lower limbs and hands			M	46	2019-06-06 21:02:11	2019-06-06	GENERAL PRACTICE	AMOXYCILLIN	Fever, unspecified	Hand Foot Mouth Disease	Hand Foot Mouth Disease	Inappropriate	unnecessary	35	WadiBaniGafer Local Hospital
6.7	M	3.7	no	fever , loss of appetite since 2 days			M	46	2019-06-28 17:21:28	2019-06-28	GENERAL PRACTICE	AMOXYCILLIN	Fever, unspecified		Fever, unspecified	Inappropriate	unnecessary	24	WadiBaniGafer Local Hospital
5.7	F	2.7	no	FEVER , RUNNY NOSE , COUGH SINCE 2 DAYS			M	46	2019-08-09 21:35:44	2019-08-09	GENERAL PRACTICE	AMOXYCILLIN	Acute upper respiratory infection, unspecified	Acute nasopharyngitis [common cold]	Acute pharyngitis, unspecified	Inappropriate	unnecessary	18	WadiBaniGafer Local Hospital
5.4	M	2.4	no	cough , fever , runny nose ,since 2 days			M	46	2019-09-15 14:03:45	2019-09-15	GENERAL PRACTICE	AMOXYCILLIN	Acute upper respiratory infection, unspecified	Acute nasopharyngitis [common cold]	Acute pharyngitis, unspecified	Inappropriate	unnecessary	22	WadiBaniGafer Local Hospital
6.2	M	3.2	no	throat pain and fever since 3days no other c/o as per the mother			F	45	2019-10-02 11:09:05	2019-10-02	GENERAL PRACTICE	AMOXYCILLIN	Acute tonsillitis, unspecified		Acute tonsillitis, unspecified	Inappropriate	unnecessary	44	WadiBaniGafer Local Hospital
4.6	M	1.6	no	fever , runny nose , cough 4 days			M	46	2019-10-20 16:39:25	2019-10-20	GENERAL PRACTICE	AMOXYCILLIN	Acute upper respiratory infection, unspecified	Acute nasopharyngitis [common cold]	Acute pharyngitis, unspecified	Inappropriate	unnecessary	32	WadiBaniGafer Local Hospital
6.2	F	3.2	no	wound of lft 2nd toe / 3 d now redness + swelling			M	46	2019-12-09 21:19:23	2019-12-09	GENERAL PRACTICE	CLOXACILLIN	Pain in limb	Infected wound	Infected wound	Appropriate	Appropriate	47	WadiBaniGafer Local Hospital
5	F	2	no	came with c/o fever with ear discharge since since 4 days.		? General Examination:- =>Temp :- 37.4?C ; ; Weight :- 8Kg ; ; General Condition :- Fair ; Dehydration :- No ; Lymphadenopathy :- No ; Throat :- Congested	M	39	2019-02-14 19:56:02	2019-02-14	GENERAL PRACTICE	AMOXYCILLIN	Fever, unspecified	Otitis media, unspecified	Otitis media, unspecified	Appropriate	Appropriate	5	WadiMistl Local Hospital
15.7	M	12.7	no		productive cough with post tussive vomiting undocemuneted fever for 3 days paroxysmal dyspnea	fair t 36.9 wt 32.6kgs (+)rales, occassional	M	39	2019-04-15 20:45:15	2019-04-15	GENERAL PRACTICE	ERYTHROMYCIN	Acute upper respiratory infection, unspecified		Acute pharyngitis, unspecified	Inappropriate	unnecessary	19	WadiMistl Local Hospital
14.9	M	11.9	no	c/oNausea & vomiting -3-4 times since today mornig-after taking meals no fever,no Loose stools mild lower abd pain, cold & cough-4 days no wheezing UOP-ok		looks well,afebrile.not pale mild dehydration wt=24.7kg bp=105/68mmHg pulse-good volume Abd-soft,tender cetral region	F	41	2019-05-02 15:46:10	2019-05-02	GENERAL PRACTICE	AMOXYCILLIN	Noninfective gastroenteritis and colitis, unspecified		Gastroenteritis of presumed infectious origin	Inappropriate	unnecessary	15	WadiMistl Local Hospital
3.8	F	0.8	no			3 days with on off fever with cough and colds T MAx 40 at home, relieved with paracetamol looks well now afebrile (given paracetamol in the morning for T 37.8) T 36.2 wt 6.3 mucoid nasal discharge no TPC clear breath sounds	M	39	2019-06-17 11:01:05	2019-06-17	GENERAL PRACTICE	CEPHALEXIN	Acute upper respiratory infection, unspecified		Acute pharyngitis, unspecified	Inappropriate	unnecessary	14	WadiMistl Local Hospital
7.4	M	4.4	no	Child with Developmental delay & CP. C/o Productive cough ++ & cold for 2 days ,Fever -2 days reduced feeding-2 days NO Wheeze. No DIB.No SOB. UOp-Ok ,BO -ok		Looks ill ,not irritable ,Afebrle ,Hydration-ok , Wt=11.5kg temp=36.6 ,no neck stiffness. Ears-NAD Throat -inflammed++ ,Tonsilitis B/L Tender cervica LN^ + Lungs-B/L few crepts+ CVs-CRFT <2 sec Abd-NAD	F	41	2019-08-04 16:36:27	2019-08-04	GENERAL PRACTICE	AMOXYCILLIN	Other acute upper respiratory infections of multiple sites	Unspecified acute lower respiratory infection	Pneumonia	Appropriate	Appropriate	9	WadiMistl Local Hospital
13.1	F	10.1	no	c/o productive cough++ for -3 days fever on & off -undocumented Mild DIB+,no sOB No wheezing Appetite -reduced. No other compl;		Looks well ,afebrile ,WT=24.9kg Throat-NAd No cervical LN^ Lungs-B/L crepts+ ,AE= CVs=PR-88/min ,CRFT <2sec Abd-NAD	F	41	2019-09-16 09:24:36	2019-09-16	GENERAL PRACTICE	AMOXYCILLIN	Unspecified acute lower respiratory infection		Pneumonia	Inappropriate	unnecessary	8	WadiMistl Local Hospital
5.6	M	2.6	no			Presenting Complaints :- fever IMCI Examination: Diarrhoea :- No Cough:- Yes Cough Classification:- Coryza(runing nose) Throat Problems :- Enlarged and tender glands in front of the neck: Fever :- Yes Fever Classification:- Fever cause known Ear Problems :- No Counseling:- When to return General Danger Signs:	M	39	2019-10-13 19:12:10	2019-10-13	GENERAL PRACTICE	AMOXYCILLIN	Acute tonsillitis, unspecified		Acute tonsillitis, unspecified	Inappropriate	unnecessary	8	WadiMistl Local Hospital
8.2	M	5.2	no	c/o Recurrent Tonsilitis- father clams about 2-3 times per months for about 1 yr no fever now , Productive cough+++ & cold for 1 week -more symptoms at night. hx recurrent b/l eye discharge+ with sticky eye lashes+		Looks well ,afebrle ,Temp=36.3 WT= 11.7kg thraot-B/L tonsilar enlargements with inflammed. B/L cervical LN ^ + ,No skin rashes Lungs-B/L crepts+ ,AE= CRFt < 2sec Abd-NAd EyE-B/L Blepharitis+	F	41	2019-10-31 11:11:29	2019-10-31	GENERAL PRACTICE	ERYTHROMYCIN	Unspecified acute lower respiratory infection	Acute tonsillitis, unspecified	Acute tonsillitis, unspecified	Inappropriate	unnecessary	9	WadiMistl Local Hospital
8	M	5	wbc in urine		follow up review of urine analysis; UTI	proxy	M	39	2019-12-11 08:08:20	2019-12-11	GENERAL PRACTICE	CEPHALEXIN	Urinary tract infection, site not specified		Urinary Tract Infection	Appropriate	Appropriate	17	WadiMistl Local Hospital
3.8	F	0.8	no			EPI No.: 0041218 IMCI Examination: Diarrhoea :- No Cough:- Yes Cough Classification:- Enlarged but Normal Bronchiolitis Throat Problems:- No Fever :- No Ear Problems :- No Additional complaints & Examination: Cough & cold- 3 days hx of 3 days fever ,but no fever today mild DIB at night+ ,? wheezing at night Feeding-reduced UOP-ok Bo-NL ------------------- wt-7.7kg Afebrile hydration-ok throat-NAD…	F	41	2019-12-26 11:19:24	2019-12-26	GENERAL PRACTICE	AUGMENTIN	Unspecified acute lower respiratory infection	Acute bronchiolitis, unspecified	Acute bronchiolitis, unspecified	Inappropriate	unnecessary	17	WadiMistl Local Hospital
26.7	M	23.7	pos wbc in stool		loose motions and fever , no vomiting no any other complaint	? General Examination:- =>BP :- 138/85 mmHg ; Temp :- 36.8?C ;	M	37	2019-01-01 12:46:50	2019-01-01	GENERAL PRACTICE	METRONIDAZOLE	Diarrhoea and gastroenteritis of presumed infectious origin		Gastroenteritis of presumed infectious origin	Inappropriate	incorrect spectrum of antibiotic	19	Wudam Health Center
5	M	2	no			IMCI Examination: Diarrhoea:- No Cough:- No Throat Problems:- No Fever :- No Ear Problems:- No Additional complaints & Examination: AGE	M	49	2019-01-04 10:38:11	2019-01-04	GENERAL PRACTICE	METRONIDAZOLE	Diarrhoea and gastroenteritis of presumed infectious origin		Gastroenteritis of presumed infectious origin	Inappropriate	unnecessary	15	Wudam Health Center
16.8	M	13.8	EH		headache and loose motions , no fever no vomiting	? General Examination:- =>Temp :- 36.3?C ; ; Jaundice :- No ; Pallor :- No ; Throat :- Clear ? Abdomen Examination:- =>soft nontender	M	37	2019-01-06 20:30:02	2019-01-06	GENERAL PRACTICE	METRONIDAZOLE	Diarrhoea and gastroenteritis of presumed infectious origin		Gastroenteritis of presumed infectious origin	Appropriate	Appropriate	24	Wudam Health Center
19.5	M	16.5	wbc in urine	c/o dysuria for 1 d with no other complain 2-3 m ago same problem less drinking of water			M	33	2019-01-10 15:45:25	2019-01-10	GENERAL PRACTICE	NALIDIXIC ACID	Dysuria		Urinary Tract Infection	Inappropriate	incorrect spectrum of antibiotic	17	Wudam Health Center
11.5	F	8.5	no	has continue fever , with sore throut .., the fever not reduce .., taken amoxcillin 3 days but still no benifit ---		temp : 37.8 throut : folicular tonsilities .., with congested throut chest : clear	F	34	2019-01-16 09:31:40	2019-01-16	GENERAL PRACTICE	AUGMENTIN	Acute tonsillitis, unspecified	Acute follicular tonsillitis	Acute tonsillitis, unspecified	Appropriate	Appropriate	26	Wudam Health Center
47.5	M	44.5	no	cough - throat pain 1wk. ago		? General Examination:- =>General Condition :- Looks Well ; Throat :- Congested ? Respiratory Examination:- =>nad	M	49	2019-01-20 20:19:30	2019-01-20	GENERAL PRACTICE	CEPHALEXIN	Acute pharyngitis, unspecified		Acute pharyngitis, unspecified	Inappropriate	unnecessary	36	Wudam Health Center
75.8	M	72.8	no	c/o abscess in left side of the neck for 2 d with pain no fever h/o rt sided abscess drainage 18-11-2018 and in 2012 non DM		? General Examination:- =>General Condition :- Looks Well ; Jaundice :- No ; Pallor :- No ; Edema Feet :- No	M	33	2019-01-26 09:27:17	2019-01-26	GENERAL PRACTICE	CLOXACILLIN	Attention to surgical dressings and sutures	Cutaneous abscess, furuncle and carbuncle, unspecified	Cutaneous abscess, furuncle and carbuncle, unspecified	Appropriate	Appropriate	25	Wudam Health Center
7.5	F	4.5	no			EPI No.: 420315 IMCI Examination: Diarrhoea:- No Cough:- No Throat Problems:- No Fever :- No Ear Problems:- No Additional complaints & Examination: CHEST :CLEAR THROAT :CONGESTED	F	32	2019-01-29 19:14:44	2019-01-29	GENERAL PRACTICE	AMOXYCILLIN	Acute nasopharyngitis [common cold]		Acute pharyngitis, unspecified	Inappropriate	unnecessary	25	Wudam Health Center
14.2	M	11.2	no	sore throut .. since 3 days .., with high grade fever --- no medical hx of asthma		temp : throut : has folicular tonsilitis .. chest : clear	F	31	2019-02-04 17:04:30	2019-02-04	GENERAL PRACTICE	AMOXYCILLIN	Fever, unspecified	Acute follicular tonsillitis	Acute tonsillitis, unspecified	Appropriate	Appropriate	30	Wudam Health Center
4.1	F	1.1	no			EPI No.: 540818 IMCI Examination: Diarrhoea:- No Cough:- No Throat Problems:- No Fever :- No Ear Problems:- No Additional complaints & Examination: chest :clear abdS:oft	F	32	2019-02-12 08:45:33	2019-02-12	GENERAL PRACTICE	AMOXYCILLIN	Acute nasopharyngitis [common cold]		Acute pharyngitis, unspecified	Inappropriate	unnecessary	21	Wudam Health Center
8.2	M	5.2	no				F	32	2019-02-18 18:05:49	2019-02-18	GENERAL PRACTICE	AMOXYCILLIN	Acute tonsillitis, unspecified		Acute tonsillitis, unspecified	Inappropriate	unnecessary	39	Wudam Health Center
9.4	F	6.4	no	fever throat pain 2 days .. no cough no other c.o		? General Examination:- =>Temp :- 38.2?C ; ; Lymphadenopathy :- Yes ; Throat :- Tonsillitis ? Respiratory Examination:- =>nvb	F	39	2019-02-22 11:36:28	2019-02-22	GENERAL PRACTICE	AMOXYCILLIN	Acute pharyngitis, unspecified		Acute pharyngitis, unspecified	Inappropriate	unnecessary	34	Wudam Health Center
4.2	M	1.2	no			EPI No.: 02-08-18 IMCI Examination: Diarrhoea :- No Cough :- No Throat Problems:- No Fever :- No Ear Problems :- No Additional complaints & Examination: teething synd.	M	49	2019-02-25 18:54:51	2019-02-25	GENERAL PRACTICE	AMOXYCILLIN	Acute nasopharyngitis [common cold]		Acute pharyngitis, unspecified	Inappropriate	unnecessary	54	Wudam Health Center
9.5	F	6.5	no		H/O FEVER AND VOMTTING SINCE YESTERDAY	? General Examination:- =>Temp :- 38.5?C ; ; Throat :- Tonsillitis ? Respiratory Examination:- =>CLEAR	F	32	2019-02-28 20:45:48	2019-02-28	GENERAL PRACTICE	CEPHALEXIN	Acute tonsillitis, unspecified		Acute tonsillitis, unspecified	Inappropriate	unnecessary	28	Wudam Health Center
68.8	M	65.8	EH		c/o loose motions 4 times since morning , no fever no vomiting with lower abdominal pain	? General Examination:- =>BP :- 159/99 mmHg ; Temp :- 36.5?C ; ; Pulse :- 84bts/min ; Dehydration :- No	M	37	2019-03-05 13:35:48	2019-03-05	GENERAL PRACTICE	METRONIDAZOLE	Diarrhoea and gastroenteritis of presumed infectious origin		Gastroenteritis of presumed infectious origin	Appropriate	Appropriate	31	Wudam Health Center
16.7	M	13.7	no	pinpricking rt. foot for dressing			M	49	2019-03-10 10:17:32	2019-03-10	GENERAL PRACTICE	AMOXYCILLIN	Attention to surgical dressings and sutures	Open wound of unspecified body region	Open wound of unspecified body region	Appropriate	Appropriate	49	Wudam Health Center
12.2	M	9.2	no	cough - fever		? General Examination:- =>Temp :- 36.7?C ; ; Weight :- 31.5Kg ; ; General Condition :- Looks Well ; Throat :- Congested ? Respiratory Examination:- =>nad	M	49	2019-03-13 07:07:58	2019-03-13	GENERAL PRACTICE	AMOXYCILLIN	Acute upper respiratory infection, unspecified		Acute pharyngitis, unspecified	Inappropriate	unnecessary	34	Wudam Health Center
37.5	F	34.5	no	not known to have any medical illness complain of sore throat and fever x 2days no other complain		? General Examination:- =>BP :- 110/63 mmHg ; Temp :- 36?C ; ; Pulse :- 89bts/min ; General Condition :- Fair ; Jaundice :- No ; Pallor :- No ; Throat :- Congested ? Respiratory Examination:- =>equal air entery b.l clear chest	F	37	2019-03-17 09:28:00	2019-03-17	GENERAL PRACTICE	AMOXYCILLIN	Acute pharyngitis, unspecified		Acute pharyngitis, unspecified	Inappropriate	unnecessary	33	Wudam Health Center
13.5	M	10.5	no	runny nose and cough x 2days		? General Examination:- =>Temp :- 36.5?C ; ; Weight :- 32.8Kg ; ; General Condition :- Fair ; Jaundice :- No ; Pallor :- No ; Throat :- Congested ? Respiratory Examination:- =>equal air entery b.l clear b.l	F	37	2019-03-19 12:55:13	2019-03-19	GENERAL PRACTICE	AMOXYCILLIN	Acute pharyngitis, unspecified		Acute pharyngitis, unspecified	Inappropriate	unnecessary	15	Wudam Health Center
8.8	F	5.8	no	cough - fever 3 days ago		? General Examination:- =>General Condition :- Looks Well ; Throat :- Congested ? Respiratory Examination:- =>nad	M	49	2019-03-22 14:10:20	2019-03-22	GENERAL PRACTICE	AMOXYCILLIN	Acute pharyngitis, unspecified		Acute pharyngitis, unspecified	Inappropriate	unnecessary	20	Wudam Health Center
6.9	M	3.9	no			c,o pain in left ear today n also fever today ... o.e throat congested wd b.l enlarged tonsilis.. left ear wd discharge present .. temp 37	F	39	2019-03-25 18:51:51	2019-03-25	GENERAL PRACTICE	AMOXYCILLIN	Otalgia	Otitis media, unspecified	Otitis media, unspecified	Appropriate	Appropriate	39	Wudam Health Center
35	F	32	no	DIZZINESS WITH THROAT PAIN		? General Examination:- =>BP :- 105/66 mmHg ; Temp :- 36.4?C ; ; Pulse :- 81bts/min ; General Condition :- Looks Well ; Cyanosis :- No ; Throat :- Tonsillitis ? Respiratory Examination:- =>NAD	M	49	2019-03-28 10:39:56	2019-03-28	GENERAL PRACTICE	ERYTHROMYCIN	Dizziness and giddiness	Acute pharyngitis	Acute pharyngitis, unspecified	Inappropriate	unnecessary	45	Wudam Health Center
43.4	M	40.4	no	cough - throat pain - heartburn		? General Examination:- =>General Condition :- Looks Well ; Cyanosis :- No ; Throat :- Congested ? Respiratory Examination:- =>nad	M	49	2019-04-01 07:54:32	2019-04-01	GENERAL PRACTICE	CEPHALEXIN	Acute upper respiratory infection, unspecified	Acute pharyngitis	Acute pharyngitis, unspecified	Inappropriate	unnecessary	36	Wudam Health Center
16.5	M	13.5	no	diarrhea with vomiting and abd. Colic		? General Examination:- =>General Condition :- Looks Well ; Cyanosis :- No ; Throat :- Clear ? Respiratory Examination:- =>clear ? Abdomen Examination:- =>soft	M	49	2019-04-06 10:55:53	2019-04-06	GENERAL PRACTICE	ERYTHROMYCIN	Diarrhoea and gastroenteritis of presumed infectious origin		Gastroenteritis of presumed infectious origin	Inappropriate	unnecessary	55	Wudam Health Center
6.3	F	3.3	no			EPI No.: 12-07-16 IMCI Examination: Diarrhoea :- Yes Duration:- 1 Days Diarrhoea Classification:- Acute Diarrhea Dehydration Classification:- No Cough :- No Throat Problems:- No Fever :- No Ear Problems :- No Additional complaints & Examination: AGE	M	49	2019-04-08 17:33:18	2019-04-08	GENERAL PRACTICE	AMOXYCILLIN	Acute pharyngitis, unspecified		Acute pharyngitis, unspecified	Inappropriate	unnecessary	47	Wudam Health Center
8.6	F	5.6	no	pain in rt. Ear	rt. Asom		M	49	2019-04-10 12:37:23	2019-04-10	GENERAL PRACTICE	AMOXYCILLIN	Other acute nonsuppurative otitis media	Otitis media, unspecified	Otitis media, unspecified	Inappropriate	unnecessary	38	Wudam Health Center
12.6	F	9.6	no	4days cough , no fever		looks well.afebrile throat tonsilitis chest clear	F	34	2019-04-15 16:50:43	2019-04-15	GENERAL PRACTICE	AMOXYCILLIN	Acute tonsillitis, unspecified		Acute tonsillitis, unspecified	Inappropriate	unnecessary	36	Wudam Health Center
36.4	M	33.4	no	neck pain - fever - no cough		? General Examination:- =>Temp :- 37.5?C ; ; Cyanosis :- No ; Throat :- Congested ? Respiratory Examination:- =>clear	M	49	2019-04-19 09:06:13	2019-04-19	GENERAL PRACTICE	ERYTHROMYCIN	Spasmodic torticollis	Acute pharyngitis	Acute pharyngitis, unspecified	Inappropriate	unnecessary	28	Wudam Health Center
33	F	30	wbc in urine	has lower abdomen pain .., has dysuria			F	31	2019-04-22 13:07:43	2019-04-22	GENERAL PRACTICE	METRONIDAZOLE	Pain localized to other parts of lower abdomen	Urinary Tract Infection	Urinary Tract Infection	Inappropriate	incorrect spectrum of antibiotic	39	Wudam Health Center
10.2	F	7.2	no	medication was not available in MPC			M	33	2019-04-27 09:03:18	2019-04-27	GENERAL PRACTICE	CEPHALEXIN	Person consulting on behalf of another person		Person consulting on behalf of another person	Inappropriate	unnecessary	34	Wudam Health Center
4.5	F	1.5	no			EPI No.: 37-04-18 IMCI Examination: Diarrhoea :- Yes Duration:- 7 Days Diarrhoea Classification:- Persistent diarrhea Dehydration Classification:- No Cough :- No Throat Problems:- No Fever :- No Ear Problems :- No Additional complaints & Examination: AGE	M	49	2019-04-29 17:58:13	2019-04-29	GENERAL PRACTICE	AMOXYCILLIN	Diarrhoea and gastroenteritis of presumed infectious origin		Gastroenteritis of presumed infectious origin	Inappropriate	unnecessary	37	Wudam Health Center
11.6	M	8.6	no	infected scabies for 2 d			M	33	2019-05-02 20:17:50	2019-05-02	GENERAL PRACTICE	CLOXACILLIN	Atopic dermatitis, unspecified	Cellulitis, unspecified	Cellulitis, unspecified	Appropriate	Appropriate	22	Wudam Health Center
8.7	F	5.7	no	cough - fever		? General Examination:- =>General Condition :- Looks Well ; Throat :- Tonsillitis ? Respiratory Examination:- =>nad	M	49	2019-05-09 10:22:16	2019-05-09	GENERAL PRACTICE	ERYTHROMYCIN	Acute tonsillitis, unspecified		Acute tonsillitis, unspecified	Inappropriate	unnecessary	13	Wudam Health Center
8	F	5	no			right index finger red painful swelling small incesion done with pus drainage	M	37	2019-05-14 20:35:18	2019-05-14	GENERAL PRACTICE	AMOXYCILLIN	Cellulitis of finger and toe		Cellulitis, unspecified	Appropriate	Appropriate	41	Wudam Health Center
12.2	M	9.2	no		open wound by sharp object in inner aspect of left ankle		M	37	2019-05-20 19:45:22	2019-05-20	GENERAL PRACTICE	AMOXYCILLIN	Open wound of other parts of foot		Open wound of unspecified body region	Appropriate	Appropriate	23	Wudam Health Center
9.7	M	6.7	no	diarrhea with fever and legs pain		? General Examination:- =>General Condition :- Looks Well ; Dehydration :- No ; Throat :- Congested ? Respiratory Examination:- =>nad ? Abdomen Examination:- =>soft	M	49	2019-05-27 19:51:29	2019-05-27	GENERAL PRACTICE	AMOXYCILLIN	Diarrhoea and gastroenteritis of presumed infectious origin		Gastroenteritis of presumed infectious origin	Inappropriate	unnecessary	26	Wudam Health Center
28.8	F	25.8	no	sore throat x2days no fever has low back pain , on injectable method of birth spacing		afebrile throat tonsilitis chest:clear	F	34	2019-06-08 13:59:34	2019-06-08	GENERAL PRACTICE	CEPHALEXIN	Acute tonsillitis, unspecified		Acute tonsillitis, unspecified	Inappropriate	unnecessary	16	Wudam Health Center
6.1	F	3.1	no			c,o flu n fever 2 days .. o/e thrpoat conegsted wd l/n enlrged .. temp 38.9	F	39	2019-06-12 20:19:52	2019-06-12	GENERAL PRACTICE	AMOXYCILLIN	Acute pharyngitis, unspecified		Acute pharyngitis, unspecified	Appropriate	Appropriate	33	Wudam Health Center
12.8	F	9.8	no	date thorn in rt 1st toe extensor aspect about 1 inch ..deep			M	33	2019-06-18 19:52:51	2019-06-18	GENERAL PRACTICE	AMOXYCILLIN	Attention to surgical dressings and sutures		Open wound of unspecified body region	Inappropriate	unnecessary	24	Wudam Health Center
4	F	1	no				F	32	2019-06-26 13:16:53	2019-06-26	GENERAL PRACTICE	AMOXYCILLIN	Fever, unspecified		Fever, unspecified	Inappropriate	unnecessary	28	Wudam Health Center
6.7	M	3.7	no			EPI No.: 300216 IMCI Examination: Diarrhoea :- No Cough:- Yes Throat Problems:- No Throat Classification:- Suspected streptococcal sore throat Fever :- No Ear Problems :- No	M	33	2019-07-02 09:37:43	2019-07-02	GENERAL PRACTICE	AMOXYCILLIN	Acute upper respiratory infection, unspecified	Streptococcal pharyngitis	Acute pharyngitis, unspecified	Appropriate	Appropriate	29	Wudam Health Center
8.9	M	5.9	neg	fever , diarrhea with blood vomit no SOB no any other cmplain			M	34	2019-07-07 13:44:02	2019-07-07	GENERAL PRACTICE	METRONIDAZOLE	Diarrhoea and gastroenteritis of presumed infectious origin		Gastroenteritis of presumed infectious origin	Inappropriate	unnecessary	37	Wudam Health Center
5.2	M	2.2	no			fever since yesterday .., -- no cough no common cold -- o/e : afebrile chest : clear throut : congested	F	31	2019-07-13 11:17:43	2019-07-13	GENERAL PRACTICE	AMOXYCILLIN	Acute nasopharyngitis [common cold]		Acute pharyngitis, unspecified	Inappropriate	unnecessary	28	Wudam Health Center
5.1	F	2.1	no			EPI No.: 64-09-17 IMCI Examination: Diarrhoea :- No Cough:- Yes Throat Problems:- No Throat Classification:- Suspected streptococcal sore throat Fever :- No Ear Problems :- No	M	33	2019-07-18 16:34:46	2019-07-18	GENERAL PRACTICE	AMOXYCILLIN	Acute upper respiratory infection, unspecified	Streptococcal pharyngitis	Acute pharyngitis, unspecified	Appropriate	Appropriate	19	Wudam Health Center
7.4	F	4.4	no				M	49	2019-07-24 11:13:20	2019-07-24	GENERAL PRACTICE	AMOXYCILLIN	Acute pharyngitis, unspecified		Acute pharyngitis, unspecified	Inappropriate	unnecessary	28	Wudam Health Center
11	F	8	no	c/o sore throat for 2 d with abd colic, vomiting no fever		? General Examination:- =>Temp :- 36?C ; ; Jaundice :- No ; Pallor :- No ; Dehydration :- No ? Abdomen Examination:- =>soft, non tender	M	33	2019-07-29 18:14:55	2019-07-29	GENERAL PRACTICE	AMOXYCILLIN	Other and unspecified abdominal pain	Acute Pharyngitis	Acute pharyngitis, unspecified	Inappropriate	unnecessary	22	Wudam Health Center
4.5	F	1.5	no				F	31	2019-08-04 16:57:03	2019-08-04	GENERAL PRACTICE	CLOXACILLIN	Pain, unspecified		Pain, unspecified	Inappropriate	unnecessary	32	Wudam Health Center
4.4	F	1.4	no			EPI No.: 10.05.18 IMCI Examination: Diarrhoea :- No Cough:- Yes Cough Classification:- Coryza(runing nose) Throat Problems:- No Fever :- No Ear Problems :- No	M	33	2019-08-10 10:52:45	2019-08-10	GENERAL PRACTICE	AMOXYCILLIN	Acute bronchiolitis, unspecified		Acute bronchiolitis, unspecified	Inappropriate	unnecessary	18	Wudam Health Center
5.3	M	2.3	no			runny nose ,fever no cough n o SOB no any other complain	M	49	2019-08-18 17:52:45	2019-08-18	GENERAL PRACTICE	AMOXYCILLIN	Acute tonsillitis, unspecified		Acute tonsillitis, unspecified	Inappropriate	unnecessary	57	Wudam Health Center
5.6	M	2.6	no			cam wd bleeding wound on chin a while ago by fall near 1.5 cm long deep wound local xylocain given 1 cc n 2 sutures 4/0 silk applied	F	39	2019-08-22 12:03:57	2019-08-22	GENERAL PRACTICE	AMOXYCILLIN	Attention to surgical dressings and sutures		Open wound of unspecified body region	Inappropriate	unnecessary	37	Wudam Health Center
29.9	F	26.9	no				F	37	2019-08-27 09:22:45	2019-08-27	GENERAL PRACTICE	CLOXACILLIN	Routine postpartum follow-up		Routine postpartum follow-up	Inappropriate	unnecessary	24	Wudam Health Center
9.5	F	6.5	no	redness lt. eye with perioribital swelling and skin lesion of the lt. forearm			M	49	2019-09-01 11:26:24	2019-09-01	GENERAL PRACTICE	CEPHALEXIN	Acute conjunctivitis, unspecified	Chalazion	Chalazion	Inappropriate	unnecessary	32	Wudam Health Center
15.2	M	12.2	no	cough - fever		? General Examination:- =>General Condition :- Looks Well ; Throat :- Congested ? Respiratory Examination:- =>nad	M	49	2019-09-03 20:42:59	2019-09-03	GENERAL PRACTICE	ERYTHROMYCIN	Acute pharyngitis, unspecified		Acute pharyngitis, unspecified	Inappropriate	unnecessary	48	Wudam Health Center
13.1	M	10.1	no				M	49	2019-09-07 13:41:14	2019-09-07	GENERAL PRACTICE	CEPHALEXIN	Acute pharyngitis, unspecified		Acute pharyngitis, unspecified	Inappropriate	unnecessary	37	Wudam Health Center
11	F	8	no	c/o sore throat for 2 d with common cold fever		? General Examination:- =>Temp :- 37.6?C ; ; Weight :- 16.7Kg ; ; General Condition :- Looks Well ; Jaundice :- No ; Pallor :- No ; Dehydration :- No ; Throat :- Tonsillitis ? Respiratory Examination:- =>clear	M	33	2019-09-10 10:43:22	2019-09-10	GENERAL PRACTICE	AMOXYCILLIN	Acute tonsillitis, unspecified		Acute tonsillitis, unspecified	Inappropriate	unnecessary	28	Wudam Health Center
47.6	M	44.6	no	c/o sore throat for 2 d with dry cough no fever		? General Examination:- =>Temp :- 37?C ; ; General Condition :- Looks Well ; Jaundice :- No ; Pallor :- No ; Dehydration :- No ; Throat :- Congested ? Respiratory Examination:- =>clear	M	33	2019-09-15 13:23:17	2019-09-15	GENERAL PRACTICE	AMOXYCILLIN	Acute nasopharyngitis [common cold]		Acute pharyngitis, unspecified	Inappropriate	unnecessary	51	Wudam Health Center
7	M	4	no			EPI No.: 54-10-15 IMCI Examination: Diarrhoea :- No Cough :- No Throat Problems:- No Fever :- No Ear Problems :- No Additional complaints & Examination: urti	M	49	2019-09-18 19:39:40	2019-09-18	GENERAL PRACTICE	ERYTHROMYCIN	Acute pharyngitis, unspecified		Acute pharyngitis, unspecified	Inappropriate	unnecessary	44	Wudam Health Center
8.5	M	5.5	no	C.O RUNNY NOSE WITH COUGH X3DAYS CASE OF ASTHMA ON REGULARE F.U		LOOKS WELL.NOT ON RS DISTRESS . TEMP 37.5C WT 17KG CHEST:CLEAR	F	34	2019-09-23 11:21:58	2019-09-23	GENERAL PRACTICE	AMOXYCILLIN	Acute pharyngitis, unspecified		Acute pharyngitis, unspecified	Inappropriate	unnecessary	45	Wudam Health Center
10	M	7	no	cough - fever		? General Examination:- =>General Condition :- Looks Well ; Throat :- Congested ? Respiratory Examination:- =>nad	M	49	2019-09-25 18:38:49	2019-09-25	GENERAL PRACTICE	AMOXYCILLIN	Acute pharyngitis, unspecified		Acute pharyngitis, unspecified	Inappropriate	unnecessary	35	Wudam Health Center
42.1	M	39.1	no	anal abscess			M	49	2019-09-29 14:05:22	2019-09-29	GENERAL PRACTICE	CLOXACILLIN	Anal abscess		Cutaneous abscess, furuncle and carbuncle, unspecified	Appropriate	Appropriate	56	Wudam Health Center
12.6	M	9.6	no	c/o sore throat for 2 d with common cold fever		? General Examination:- =>General Condition :- Looks Well ; Jaundice :- No ; Pallor :- No ; Dehydration :- No ; Throat :- Congested ? Respiratory Examination:- =>clear	M	33	2019-10-01 18:49:31	2019-10-01	GENERAL PRACTICE	AMOXYCILLIN	Acute upper respiratory infection, unspecified		Acute pharyngitis, unspecified	Inappropriate	unnecessary	36	Wudam Health Center
11.3	M	8.3	no	fever		? General Examination:- =>General Condition :- Looks Well ; Throat :- Congested ? Respiratory Examination:- =>nad	M	49	2019-10-05 10:18:40	2019-10-05	GENERAL PRACTICE	AMOXYCILLIN	Acute pharyngitis, unspecified		Acute pharyngitis, unspecified	Inappropriate	unnecessary	28	Wudam Health Center
69.8	M	66.8	no	paronychea in rt thumb for 2 d k/c/o DM		? General Examination:- =>General Condition :- Looks Well ; Jaundice :- No ; Pallor :- No	M	33	2019-10-08 07:07:50	2019-10-08	GENERAL PRACTICE	CLOXACILLIN	Attention to surgical dressings and sutures	Cellulitis, unspecified	Cellulitis, unspecified	Appropriate	Appropriate	40	Wudam Health Center
11.7	F	8.7	no	cough - fever		? General Examination:- =>General Condition :- Looks Well ; Throat :- Congested ? Respiratory Examination:- =>nad	M	49	2019-10-09 19:07:47	2019-10-09	GENERAL PRACTICE	AMOXYCILLIN	Acute nasopharyngitis [common cold]		Acute pharyngitis, unspecified	Inappropriate	unnecessary	45	Wudam Health Center
9.6	M	6.6	no	cough - fever		? General Examination:- =>General Condition :- Looks Well ; Throat :- Congested ? Respiratory Examination:- =>nad	M	49	2019-10-13 09:20:02	2019-10-13	GENERAL PRACTICE	CEPHALEXIN	Acute nasopharyngitis [common cold]		Acute pharyngitis, unspecified	Inappropriate	unnecessary	64	Wudam Health Center
36.1	M	33.1	no	fever with sore thraot x2days		looks sick , afebrile throat tonsilitis with exudate chest:clear	F	34	2019-10-14 17:24:18	2019-10-14	GENERAL PRACTICE	AMOXYCILLIN	Acute tonsillitis, unspecified	Streptococcal tonsillitis	Acute tonsillitis, unspecified	Appropriate	Appropriate	52	Wudam Health Center
7.8	F	4.8	no			EPI No.: 11-01-15 IMCI Examination: Diarrhoea :- No Cough:- Yes Throat Problems:- No Throat Classification:- Suspected streptococcal sore throat Fever :- No Ear Problems :- No	M	33	2019-10-16 19:45:26	2019-10-16	GENERAL PRACTICE	AMOXYCILLIN	Acute upper respiratory infection, unspecified	Streptococcal pharyngitis	Acute pharyngitis, unspecified	Appropriate	Appropriate	45	Wudam Health Center
3.7	M	0.7	no			cough ,runny nose, rapid breathing no fever no vomiting bowel habit normal no any other complain	M	34	2019-10-20 10:04:02	2019-10-20	GENERAL PRACTICE	AMOXYCILLIN	Acute nasopharyngitis [common cold]		Acute pharyngitis, unspecified	Inappropriate	unnecessary	63	Wudam Health Center
30.8	F	27.8	no		rt thumb swelling and pain, since 2d, with pus collection ? and petechial pathch near it no h/o trauma,		F	32	2019-10-22 10:56:27	2019-10-22	GENERAL PRACTICE	CLOXACILLIN	Localized swelling, mass and lump, upper limb		Cutaneous abscess, furuncle and carbuncle, unspecified	Appropriate	Appropriate	36	Wudam Health Center
10.5	M	7.5	no		c.o with sore throut .., associated with high grade fever since 2 days no medical hx .. === afebrile throut : acute tonsilitis chest :clear		F	31	2019-10-25 10:55:50	2019-10-25	GENERAL PRACTICE	AMOXYCILLIN	Acute tonsillitis, unspecified		Acute tonsillitis, unspecified	Inappropriate	unnecessary	25	Wudam Health Center
6	M	3	no			EPI No.: 4.10.16 IMCI Examination: Diarrhoea :- No Cough:- Yes Throat Problems:- No Throat Classification:- Suspected streptococcal sore throat Fever :- No Ear Problems :- No	M	33	2019-10-29 17:43:03	2019-10-29	GENERAL PRACTICE	AMOXYCILLIN	Acute upper respiratory infection, unspecified	Streptococcal pharyngitis	Acute pharyngitis, unspecified	Appropriate	Appropriate	46	Wudam Health Center
5.5	F	2.5	no			EPI No.: 38-04-17 IMCI Examination: Diarrhoea :- No Cough:- Yes Cough Classification:- Coryza(runing nose) Throat Problems:- No Fever :- No Ear Problems :- No Additional complaints & Examination: look well afebrile throat congested chest equal air entery b.l ,, normal breathing sound	F	37	2019-11-03 09:57:23	2019-11-03	GENERAL PRACTICE	AMOXYCILLIN	Nausea and vomiting	Acute nasopharyngitis [common cold]	Acute pharyngitis, unspecified	Inappropriate	unnecessary	41	Wudam Health Center
35.8	M	32.8	no	c/o sore thraot for 2 d with heratburn no other complain		? General Examination:- =>General Condition :- Looks Well ; Jaundice :- No ; Pallor :- No ; Dehydration :- No ; Throat :- Congested	M	33	2019-11-05 15:55:32	2019-11-05	GENERAL PRACTICE	CEPHALEXIN	Streptococcal pharyngitis		Acute pharyngitis, unspecified	Appropriate	Appropriate	50	Wudam Health Center
8.7	M	5.7	no				M	49	2019-11-07 16:15:04	2019-11-07	GENERAL PRACTICE	AMOXYCILLIN	Acute tonsillitis, unspecified		Acute tonsillitis, unspecified	Inappropriate	unnecessary	46	Wudam Health Center
4.8	M	1.8	no			has common cold .., has fever since 2 days .., --- has teeth ingrowing syndome .. --- o/e : temp : 37.1 chest : wheezing throut : congested ..	F	31	2019-11-11 10:30:42	2019-11-11	GENERAL PRACTICE	AMOXYCILLIN	Fever, unspecified		Fever, unspecified	Inappropriate	unnecessary	55	Wudam Health Center
7	M	4	no			EPI No.: 411015 IMCI Examination: Diarrhoea :- No Cough :- No Throat Problems:- No Fever :- No Ear Problems :- No Additional complaints & Examination: urti	M	49	2019-11-13 08:47:43	2019-11-13	GENERAL PRACTICE	AMOXYCILLIN	Acute nasopharyngitis [common cold]		Acute pharyngitis, unspecified	Inappropriate	unnecessary	34	Wudam Health Center
11.5	M	8.5	no	cough - fever		? General Examination:- =>General Condition :- Looks Well ; Throat :- Congested ? Respiratory Examination:- =>nad	M	49	2019-11-16 09:30:07	2019-11-16	GENERAL PRACTICE	AMOXYCILLIN	Acute pharyngitis, unspecified		Acute pharyngitis, unspecified	Inappropriate	unnecessary	26	Wudam Health Center
6.2	M	3.2	no			IMCI Examination: Diarrhoea :- No Cough :- No Throat Problems:- No Fever :- No Ear Problems :- No Additional complaints & Examination: fever, not coming easily with paracetamol, not eating well, looks sick, mild dehydration, temp 38 throat congested	F	32	2019-11-19 10:51:01	2019-11-19	GENERAL PRACTICE	AMOXYCILLIN	Acute nasopharyngitis [common cold]		Acute pharyngitis, unspecified	Inappropriate	unnecessary	43	Wudam Health Center
5.4	F	2.4	no			EPI No.: 570517 IMCI Examination: Diarrhoea :- No Cough :- No Throat Problems:- No Fever :- No Ear Problems :- No Additional complaints & Examination: urti	M	49	2019-11-21 16:43:49	2019-11-21	GENERAL PRACTICE	AMOXYCILLIN	Acute pharyngitis, unspecified		Acute pharyngitis, unspecified	Inappropriate	unnecessary	24	Wudam Health Center
12	M	9	no	Lt knee abressions			M	34	2019-11-25 09:43:45	2019-11-25	GENERAL PRACTICE	CLOXACILLIN	Open wound of knee		Open wound of unspecified body region	Inappropriate	unnecessary	45	Wudam Health Center
8.2	M	5.2	no		fever, cold since yesterday	? General Examination:- =>Temp :- 36?C ; ; Weight :- 12.5Kg ; ; General Condition :- Looks Well ; Throat :- Tonsillitis ? Respiratory Examination:- =>clear	F	32	2019-11-30 11:09:11	2019-11-30	GENERAL PRACTICE	AMOXYCILLIN	Acute tonsillitis, unspecified		Acute tonsillitis, unspecified	Inappropriate	unnecessary	43	Wudam Health Center
48.5	M	45.5	no	C.O SORE THROAT WITH FEVER X2DAYS		LOOKS SICK THROAT TONSILITIS CHEST:CLEAR	F	34	2019-12-02 08:36:26	2019-12-02	GENERAL PRACTICE	AMOXYCILLIN	Acute tonsillitis, unspecified		Acute tonsillitis, unspecified	Inappropriate	unnecessary	47	Wudam Health Center
46.1	F	43.1	no	mouth pain - cough	glossitis	? General Examination:- =>General Condition :- Looks Well ; Throat :- Congested ? Respiratory Examination:- =>nad	M	49	2019-12-04 18:19:37	2019-12-04	GENERAL PRACTICE	CEPHALEXIN	Pain in joint	Acute pharyngitis	Acute pharyngitis, unspecified	Inappropriate	unnecessary	55	Wudam Health Center
9.3	M	6.3	no	c/o common cold for 2 d sore throat with runny nose fever		? General Examination:- =>Temp :- 39?C ; ; Jaundice :- No ; Pallor :- No ; Dehydration :- No ? Respiratory Examination:- =>clear	M	33	2019-12-08 17:58:57	2019-12-08	GENERAL PRACTICE	AMOXYCILLIN	Acute nasopharyngitis [common cold]		Acute pharyngitis, unspecified	Inappropriate	unnecessary	39	Wudam Health Center
5	M	2	no			IMCI Examination: Diarrhoea :- No Cough :- No Throat Problems:- No Fever :- No Ear Problems :- No Additional complaints & Examination: scalp wound for dressing	M	49	2019-12-10 12:07:54	2019-12-10	GENERAL PRACTICE	AMOXYCILLIN	Attention to surgical dressings and sutures		Open wound of unspecified body region	Inappropriate	unnecessary	41	Wudam Health Center
12.6	M	9.6	no				M	37	2019-12-13 10:55:25	2019-12-13	GENERAL PRACTICE	CLOXACILLIN	Attention to surgical dressings and sutures		Open wound of unspecified body region	Inappropriate	unnecessary	25	Wudam Health Center
4.1	M	1.1	no			EPI No.: 430918 IMCI Examination: Diarrhoea :- No Cough :- No Throat Problems:- No Fever :- No Ear Problems :- No Additional complaints & Examination: AGE	M	49	2019-12-16 10:26:54	2019-12-16	GENERAL PRACTICE	AMOXYCILLIN	Diarrhoea and gastroenteritis of presumed infectious origin		Gastroenteritis of presumed infectious origin	Inappropriate	unnecessary	42	Wudam Health Center
23.4	F	20.4	no	peristent cough -bodyache		? General Examination:- =>BP :- 113/73 mmHg ; Temp :- 37.5?C ; ; General Condition :- Looks Well ; Throat :- Congested ? Respiratory Examination:- =>nad	M	49	2019-12-19 11:35:01	2019-12-19	GENERAL PRACTICE	AMOXYCILLIN	Acute pharyngitis, unspecified		Acute pharyngitis, unspecified	Inappropriate	unnecessary	25	Wudam Health Center
3.7	M	0.7	no			c/o right ear bleeding after traumatic rupture of tympanic membrane as her older sister was cleaning her ear by cotton rod she already was c/o purulent ear discharge last few days	M	37	2019-12-24 20:24:38	2019-12-24	GENERAL PRACTICE	AMOXYCILLIN	Perforation of tympanic membrane, unspecified	Otitis media, unspecified	Otitis media, unspecified	Appropriate	Appropriate	22	Wudam Health Center
12.4	F	9.4	no		h/o fever and thorat pain today	? General Examination:- =>Throat :- Congested ? Respiratory Examination:- =>clear	F	32	2019-12-29 17:21:21	2019-12-29	GENERAL PRACTICE	AMOXYCILLIN	Acute pharyngitis, unspecified		Acute pharyngitis, unspecified	Inappropriate	unnecessary	29	Wudam Health Center
